## How clustered protocadherin binding specificity is tuned for neuronal self/non-self-recognition

Kerry M. Goodman<sup>1,7</sup>, Phinikoula S. Katsamba<sup>1,7</sup>, Rotem Rubinstein<sup>5,6</sup>  
Göran Ahlsén<sup>1</sup>, Fabiana Bahna<sup>1</sup>, Seetha Mannepalli<sup>1</sup>, Hanbin Dan<sup>4</sup>,  
Rosemary Sampogna<sup>4</sup>, Lawrence Shapiro<sup>1,2\*</sup>, and Barry Honig<sup>1,2,3,4\*</sup>

<sup>1</sup>Zuckerman Mind, Brain and Behavior Institute, Columbia University, New York, NY 10027, USA

<sup>2</sup>Department of Biochemistry and Molecular Biophysics, Columbia University, New York, NY 10032, USA

<sup>3</sup>Department of Systems Biology, Columbia University, New York, NY 10032, USA

<sup>4</sup>Department of Medicine, Division of Nephrology, Columbia University, New York, NY 10032, USA

<sup>5</sup>School of Neurobiology, Biochemistry and Biophysics, Tel Aviv University, Israel

<sup>6</sup>Sagol School of Neuroscience, Tel Aviv University, Israel

<sup>7</sup>Equal contribution

\*Correspondence: lss8@columbia.edu (L.S.); bh6@cumc.columbia.edu (B.H.)

1 **Abstract (152 words)**

2 The stochastic expression of fewer than 60 clustered protocadherin (cPcdh) isoforms provides  
3 diverse identities to individual vertebrate neurons and a molecular basis for self/non-self-  
4 discrimination. cPcdhs form chains mediated by alternating *cis* and *trans* interactions between  
5 apposed membranes, which has been suggested to signal self-recognition. Such a mechanism  
6 requires that cPcdh *cis* dimers form promiscuously to generate diverse recognition units, and that  
7 *trans* interactions have precise specificity so that isoform mismatches terminate chain growth.  
8 However, the extent to which cPcdh interactions fulfill these requirements has not been  
9 definitively demonstrated. Here we report biophysical experiments showing that cPcdh *cis*  
10 interactions are promiscuous, but with preferences favoring formation of heterologous *cis* dimers.  
11 *Trans*-homophilic interactions are remarkably precise, with no evidence for heterophilic  
12 interactions between different isoforms. A new C-type cPcdh crystal structure and mutagenesis  
13 data help to explain these observations. Overall, the interaction characteristics we report for cPcdhs  
14 help explain their function in neuronal self/non-self-discrimination.

## 15 Introduction

16 Clustered protocadherins (cPcdhs) are a large family of cadherin-like proteins named for the  
17 clustered arrangement of their genes in vertebrate genomes (Wu and Maniatis, 1999; Wu et al.,  
18 2001). cPcdhs play roles in many facets of neural development (Peek et al., 2017), including circuit  
19 development, most notably neurite self-avoidance in vertebrates (Kostadinov and Sanes, 2015;  
20 Lefebvre et al., 2012; Mountoufaris et al., 2017), and tiling (Chen et al., 2017). In self-avoidance,  
21 neurites from the same neuron (sister neurites) actively avoid one another, whereas neurons from  
22 different neurons can freely interact. Tiling is similar to self-avoidance, but in tiling all neurons  
23 acquire the same identity, so that there is uniform repulsion among self- and non-self neurites  
24 (Chen et al., 2017). Self-avoidance among sister neurites leads to the characteristic arbor structures  
25 of dendritic trees, and prevents the formation of self-synapses (Kostadinov and Sanes, 2015;  
26 Lefebvre et al., 2012).

27

28 The molecular mechanisms through which neurons discriminate self from non-self, differ between  
29 vertebrate and most invertebrate animals. For arthropod invertebrates such as *Drosophila*  
30 *melanogaster*, self-avoidance is mediated by immunoglobulin superfamily Dscam1 cell surface  
31 proteins. The stochastic alternative splicing of *Dscam1* pre-mRNAs can, in principle, generate  
32 19,008 distinct extracellular isoforms; the vast majority of which, based on ELISA-based binding  
33 assay, mediate homophilic recognition (Miura et al., 2013; Schmucker et al., 2000; Wojtowicz et  
34 al., 2004; Wojtowicz et al., 2007). Each neuron expresses a repertoire estimated at 10–50 isoforms  
35 and the large number of Dscam1 isoforms ensures a low probability that any two contacting  
36 neurons will have an identical or even a similar isoform repertoire thus minimizing the chance of  
37 inappropriate avoidance between non-self neurons (Hattori et al., 2009).

38

39 In mammalian nervous systems cPcdh isoform expression is controlled by the unique organization  
40 of three tandem gene clusters, *Pcdh $\alpha$* , *Pcdh $\beta$* , and *Pcdh $\gamma$*  (Wu and Maniatis, 1999), with each  
41 cluster containing multiple variable exons, which encode full cPcdh ectodomain regions with six  
42 extracellular cadherin (EC) domains, a single transmembrane region, and a short cytoplasmic  
43 extension (Figure 1A). The *Pcdh $\alpha$*  and *Pcdh $\gamma$*  gene clusters also contain three ‘constant’ exons that  
44 encode cluster-specific intracellular domains. The last two variable exons in the *Pcdh $\alpha$*  gene

45 cluster and the last three variable exons of the *Pcdhγ* gene cluster diverge in sequence from other  
46 cPcdh isoforms and are referred to as ‘C-type’ cPcdhs (Wu and Maniatis, 1999; Wu et al., 2001).  
47 Sequence differences further subdivide *Pcdhγ* genes into two subfamilies – *PcdhγA* and *PcdhγB*  
48 (Wu and Maniatis, 1999). The full mouse cPcdh complement is comprised of 53 non-C-type  
49 cPcdhs, commonly known as alternate cPcdhs ( $\alpha$ 1–12,  $\beta$ 1–22,  $\gamma$ A1–12, and  $\gamma$ B1–7), whose  
50 expression choices vary stochastically between cells through alternate promoter choice (Canzio  
51 and Maniatis, 2019); and 5 C-type cPcdhs ( $\alpha$ C1,  $\alpha$ C2,  $\gamma$ C3,  $\gamma$ C4, and  $\gamma$ C5), which are constitutively  
52 expressed. cPcdh expression, either stochastic or constitutive, varies between cell types: For  
53 example, olfactory sensory neurons express ~5–10 cPcdhs stochastically; Purkinje neurons express  
54 ~10 alternate cPcdhs stochastically and all five C-types constitutively (Esumi et al., 2005; Kaneko  
55 et al., 2006); and serotonergic neurons express just  $\alpha$ C2 constitutively (Canzio and Maniatis, 2019;  
56 Chen et al., 2017). While the cPcdh and Dscam1 systems bear striking similarities, the relatively  
57 small number of cPcdh isoforms – fewer than 60 – has presented a significant challenge to  
58 generation of sufficient diversity to provide mammalian neurons with functionally unique  
59 identities.

60  
61 Solution biophysics and functional mutagenesis studies, have shown that cPcdhs interact in *trans*  
62 through antiparallel interactions between their EC1–EC4 regions (Rubinstein et al. 2015), and  
63 crystal structures of alternate  $\alpha$ ,  $\beta$ , and  $\gamma$  cPcdh *trans*-homodimers have revealed interfaces  
64 involving EC1 interacting with EC4 and EC2 with EC3 (Figure 1B) (Goodman et al., 2016a;  
65 Goodman et al., 2016b; Nicoludis et al., 2016; Rubinstein et al., 2015; Thu et al., 2014). cPcdhs  
66 also form *cis* dimers through their membrane-proximal EC5–EC6 regions, and are presented on  
67 cell surfaces as *cis* dimers (Goodman et al., 2017; Rubinstein et al., 2015; Thu et al., 2014). Crystal  
68 structures of *cis*-interacting protocadherin ectodomains (Brasch et al., 2019; Goodman et al., 2017)  
69 have revealed an asymmetrical interaction mode, where one molecule interacts through elements  
70 of EC5 and EC6, and the other interacts exclusively through EC6 (Figure 1C). To date, structural  
71 studies of C-type cPcdh interactions have not been available. Here we extend our molecular  
72 understanding of cPcdhs to C-type isoforms as well, with the goal of understanding the  
73 evolutionary design of the entire family.

74

75 In order to explain how about 60 cPcdh isoforms can provide a comparable or even greater level  
76 of neuronal diversity as 19,000 Dscam isoforms, Rubinstein et al. (2015) proposed that cPcdhs  
77 located on apposed membrane surfaces would form an extended zipper-like lattice through  
78 alternating *cis* and *trans* interactions (Figure 1D). In self-interactions – between two membranes  
79 with identical cPcdh repertoires – these chains would grow to form large structures, limited mainly  
80 by the number of molecules (Brasch et al., 2019; Rubinstein et al., 2015). However, in non-self-  
81 interactions – between two membranes with differing cPcdh repertoires – such large linear  
82 assemblies would not form since even a single mismatch between expressed isoforms would  
83 terminate chain assembly (Brasch et al., 2019; Rubinstein et al., 2017; Rubinstein et al., 2015).  
84 This “isoform-mismatch chain-termination model” for the “barcoding” of vertebrate neurons  
85 envisions the assembly of long cPcdh chains between sites of neurite-neurite contact to represent  
86 the signature of “self”, which is then translated by downstream signaling that leads to self-  
87 avoidance (Fan et al., 2018). X-ray crystallographic studies and cryo-electron tomography (cryo-  
88 ET) studies of the full-length cPcdh ectodomains bound between the surfaces of adherent  
89 liposomes revealed the existence of linear zippers thus providing strong evidence supporting the  
90 validity of the model (Brasch et al., 2019). However, crucial questions remain unanswered. Here,  
91 a number of them are addressed.

92  
93 1) For the proposed mechanism to successfully explain neuronal barcoding, *cis* interactions must  
94 be promiscuous to generate diverse repertoires of *cis*-dimeric biantennary ‘interaction units’, while  
95 *trans* interactions must be highly specific so that mismatched isoforms do not inappropriately  
96 enable growth of the chain through heterophilic interactions. While cell aggregation assays have  
97 suggested *trans* homophilic specificity, these assays only reflect a *competition* between different  
98 cell populations and thus don’t inform as to the strength of heterophilic interactions. Moreover,  
99 the results of cell aggregation assays depend critically on the *relative* strengths of homophilic and  
100 heterophilic interactions and thus do not inform as to actual binding affinities (Honig and Shapiro,  
101 2020). It is thus necessary to establish the extent to which heterophilic *trans* interactions are truly  
102 disallowed.

103  
104 2) The assumption that *cis* interactions are promiscuous is based in large part on the fact that  $\alpha$ -  
105 cPcdhs and  $\gamma$ C4 cannot reach the cell surface without binding *in cis* to another “carrier” isoform

106 (Bonn et al., 2007; Goodman et al., 2016b; Murata et al., 2004; Schreiner and Weiner, 2010; Thu  
107 et al., 2014). As is the case for *trans* interactions, the strength of *cis* interactions has only been  
108 probed quantitatively in a small number of cases so that the term “promiscuous” is qualitative at  
109 best. In fact, as compared to  $\gamma$ B and  $\beta$  cPcdh isoforms, most  $\gamma$ A-Pcdhs do not form measurable *cis*  
110 homodimers in solution (Goodman et al., 2016b) (Figure 4—source data 1). Nevertheless, all  $\gamma$ A-  
111 Pcdhs are still able to reach the cell surface when expressed alone (Thu et al., 2014). This  
112 observation can be understood if the *cis* dimerization affinity of  $\gamma$ A-Pcdhs is large enough to enable  
113 them to dimerize in the 2D membrane environment (Goodman et al., 2016b; Wu et al., 2013).  
114 Nevertheless, their weak dimerization affinities suggest, more generally, that cPcdhs may exhibit  
115 a range of *cis* dimerization affinities. We establish below that a wide range of affinities does in  
116 fact exist and, strikingly, most homophilic *cis* interactions are weaker than their heterophilic  
117 counterparts. We consider the functional implications of this novel observation in the discussion.

118

119 3) Structures have not yet been determined for complete C-type cPcdh ectodomains. Yet these  
120 isoforms play unique functional roles, some of which have no apparent connection to isoform  
121 diversity. For example, a single C-type isoform is sufficient for tiling which can be simply  
122 understood in terms of the formation of zippers containing identical homodimers so that all  
123 interacting neurons will avoid one another (Chen et al., 2017). Moreover, Garrett and coworkers  
124 discovered that neuronal survival and postnatal viability is controlled solely by  $\gamma$ C4 suggesting a  
125 function that is unique to this isoform (although it presumably requires  $\beta$  and/or other  $\gamma$  carriers to  
126 reach the cell surface) (Garrett et al., 2019). Additionally, a recent paper by Iqbal and coworkers  
127 has shown that genetic  $\gamma$ C4 variants cause a neurodevelopmental disorder which is potentially  
128 linked to  $\gamma$ C4’s role in programmed cell death of neuronal cells (Iqbal et al., 2021). Below we  
129 report extensive biophysical interaction studies of C-type isoform ectodomains and report the first  
130 crystal structure of a *trans* dimer formed by  $\gamma$ C4. Our findings reveal that the specialized functions  
131 of C-type cPcdhs probably do not involve unique structural or biophysical properties of their  
132 ectodomains.

133

134 Overall, in accordance with the requirements of the isoform-mismatch chain-termination model,  
135 we find that *trans*-homophilic interactions are remarkably precise, with no evidence for  
136 heterophilic interactions between different cPcdh isoforms. In contrast cPcdh *cis* interactions are

137 largely promiscuous but with relatively weak intra-subfamily and, especially, homophilic  
138 interactions. Possible implications of this somewhat surprising finding are considered in the  
139 discussion. Our study reveals how the extraordinary demands posed by the need to assign each  
140 neuron with a unique identity are met by an unprecedented level of protein-protein interaction  
141 specificity.

142

## 143 **Results**

### 144 *cPcdh trans interactions are strictly homophilic*

145 We generated biotinylated ectodomain fragments containing the *trans*-interacting EC1–4 regions  
146 (Nicoludis et al., 2015; Rubinstein et al., 2015) of six representative  $\alpha$ ,  $\beta$ ,  $\gamma$ A, and  $\gamma$ B mouse cPcdh  
147 isoforms –  $\alpha$ 7,  $\beta$ 6,  $\beta$ 8,  $\gamma$ A8,  $\gamma$ A9 and  $\gamma$ B2 – which include the most closely related isoforms by  
148 sequence identity from the  $\beta$  and  $\gamma$ A subfamilies ( $\beta$ 6/8 and  $\gamma$ A8/9) (Rubinstein et al., 2015). These  
149 molecules were coupled over independent Neutravidin-immobilized flow cells and *trans*-  
150 interacting ectodomain fragments of multiple members of each cPcdh subfamily, including the C-  
151 types ( $\alpha$ 4,  $\alpha$ 7,  $\alpha$ 12,  $\beta$ 6,  $\beta$ 8,  $\gamma$ A4,  $\gamma$ A8,  $\gamma$ A9,  $\gamma$ B2,  $\gamma$ B4,  $\gamma$ B5,  $\alpha$ C2,  $\gamma$ C3,  $\gamma$ C4, and  $\gamma$ C5), were then  
152 flowed over the six cPcdh surfaces to assess their binding. The surface plasmon resonance (SPR)  
153 binding profiles reveal strictly homophilic binding (Figure 2A). All ectodomain fragments used  
154 in these SPR experiments were confirmed to form homodimers in solution by sedimentation  
155 equilibrium analytical ultracentrifugation (AUC) (Figure 2—source data 1), validating that these  
156 proteins are well-behaved and active. Remarkably, no heterophilic binding was observed for any  
157 of the analytes over any of the six surfaces (Figure 2A). Even  $\beta$ 6/8 and  $\gamma$ A8/9 that have 92% and  
158 82% sequence identities respectively in their *trans*-binding EC1–4 regions exhibit no heterophilic  
159 binding. We estimate that, for heterophilic *trans*-dimers, the lower limit for the dissociation  
160 constant ( $K_D$ ) would be  $\sim$ 200  $\mu$ M. Mutations designed to disrupt  $\alpha$ 7,  $\beta$ 6, and  $\gamma$ A8 *trans* interaction  
161 inhibited homophilic binding, demonstrating that the observed binding occurs via the *trans*  
162 interface (Figure 2—figure supplement 1A) (Goodman et al., 2016a; Goodman et al., 2016b;  
163 Rubinstein et al., 2015). This behavior is unlike that of other adhesion receptor families where,  
164 whether they display homophilic or heterophilic preferences, the signal is never as binary as the  
165 one shown in Figure 2 (Honig and Shapiro, 2020).

166

167 Much of the original evidence as to homophilic specificity was based on cell aggregation assays  
168 (Rubinstein et al., 2015; Schreiner and Weiner, 2010; Thu et al., 2014) and it is of interest to  
169 compare the results obtained from these assays to those obtained from SPR. We do this in the  
170 context of examining the heterophilic binding specificity between  $\beta_{6_{1-4}}$  and  $\beta_{8_{1-4}}$  *trans* fragments  
171 that share 92% sequence identity and differ at only five residues (Figure 2—figure supplement  
172 2A), within their respective binding interfaces (Goodman et al., 2016a). Each of these residues  
173 was mutated individually and in combination. Figure 2—figure supplement 2B and C display SPR  
174 profiles and cell aggregation images, respectively, for wild type  $\beta_6$  and  $\beta_8$  and for the various  
175 mutations. We first note that changing all five residues in  $\beta_6$  to those of  $\beta_8$  generates a mutant  
176 protein with essentially wild type  $\beta_8$  properties; it binds strongly to  $\beta_8$  but not to  $\beta_6$  as seen in  
177 SPR and also forms mixed aggregates with  $\beta_8$  but not  $\beta_6$ . In contrast, most of the single residue  
178 mutants retain  $\beta_6$ -like properties in both assays whereas double and triple mutants exhibit  
179 intermediate behavior between  $\beta_6$  and  $\beta_8$ . These results demonstrate that despite the 92% sequence  
180 identity between  $\beta_6$  and  $\beta_8$ , their highly specific homophilic properties can be attributed to five  
181 interfacial residues. Moreover, the cell aggregation assays are consistent with the heterophilic  
182 binding traces measured by SPR; cells expressing mutants that generate strong SPR signals with  
183 either wild type  $\beta_6$  or  $\beta_8$  also form mixed aggregates with cells expressing the same wild-type  
184 protein.

185  
186 Of note, *trans*-interacting fragments of all four C-type cPcdhs tested showed no binding over the  
187 alternate cPcdh SPR surfaces (Figure 2A). To test whether C-type cPcdhs also show strict  
188 homophilic specificity with respect to each other we coupled biotinylated *trans*-interacting  
189 fragments of  $\alpha C_2$ ,  $\gamma C_3$ ,  $\gamma C_4$ , and  $\gamma C_5$  to SPR chips and passed the same four fragments alongside  
190 alternate cPcdh *trans* fragments over these four surfaces. Only homophilic binding was observed,  
191 with each of the four C-type fragments binding to its cognate partner and no other isoform (Figure  
192 2B). Disrupting the  $\gamma C_5$  *trans* interaction with the S116R mutation (Rubinstein et al., 2015),  
193 inhibited binding to the  $\gamma C_5$  surface, demonstrating that the observed binding occurs via the *trans*  
194 interface (Figure 2—figure supplement 1B).

195



196 In contrast to the other C-type isoforms,  $\alpha$ C1 does not mediate cell-cell interactions in cell  
197 aggregation assays even when co-expressed with cPcdhs that facilitate cell-surface delivery of  $\gamma$ C4  
198 (Thu et al., 2014). Although we have been able to produce an  $\alpha$ C1 EC1–4 fragment the  
199 recombinant molecule forms disulfide-linked multimers which are likely non-native, precluding  
200 confident examination of  $\alpha$ C1's potential *trans* interactions. Notably, the sequence of mouse  $\alpha$ C1  
201 reveals the EC3:EC4 linker does not contain the full complement of calcium-coordinating residues,  
202 which may impact the structure and binding properties of this protein (Thu et al., 2014).

203  
204 Since all the cPcdh *trans* fragment molecules used in these SPR experiments homodimerize our  
205 SPR data cannot be used to determine accurate binding affinities (Rich and Myszka, 2007). We  
206 therefore used AUC to measure the *trans*-homodimer  $K_{DS}$  (Figure 2—source data 1) revealing a  
207 >200-fold range of binding affinities, from 2.9  $\mu$ M ( $\alpha$ 7<sub>1-5</sub>) to >500  $\mu$ M ( $\gamma$ C4<sub>1-4</sub>). Regardless of  
208 their *trans* binding affinity, all cPcdhs (except  $\alpha$ C1) have previously been shown to effectively  
209 mediate cell-cell interactions in cell aggregation assays (Schreiner and Weiner, 2010; Thu et al.,  
210 2014).

211  
212 ***Crystal structure of C-type cPcdh  $\gamma$ C4 reveals EC1–4-mediated head-to-tail trans dimer interaction***  
213 The biophysical properties of C-type cPcdhs pose a number of interesting questions: Despite their  
214 more divergent sequences compared with alternate cPcdhs, AUC data has confirmed that C-type  
215 cPcdhs  $\alpha$ C2,  $\gamma$ C3, and  $\gamma$ C5 form *trans*-dimers using their EC1–4 domains (Goodman et al., 2016b;  
216 Rubinstein et al., 2015). However,  $\gamma$ C4<sub>1-4</sub> behaved as a very weak dimer in AUC ( $K_D > 500 \mu$ M;  
217 Figure 2—source data 1), nevertheless full-length  $\gamma$ C4 can mediate cell aggregation when  
218 delivered to the cell surface by co-expression with a ‘carrier’ cPcdh (Thu et al., 2014). In addition,  
219 C-type isoforms have unique expression profile and function compared to alternate cPcdhs (Canzio  
220 and Maniatis, 2019; Mountoufaris et al., 2016). However, there are no published crystal structures  
221 of C-type cPcdh *trans* dimers. We therefore sought to crystallize a C-type cPcdh engaged in a *trans*  
222 interaction and obtained two distinct crystal forms of  $\gamma$ C4<sub>EC1-4</sub>, one at 2.4 Å resolution (crystallized  
223 at pH 7.5) and the other with anisotropic diffraction at 4.6/3.9/3.5 Å resolution (Figure 3A, Figure  
224 3—figure supplement 1A,B, Figure 3—source data 1) (crystallized at pH 6.0). Both crystal  
225 structures revealed an EC1–4-mediated head-to-tail *trans* dimer: The 4.6/3.9/3.5 Å crystal

226 structure appears to have a fully intact *trans* interface with a total buried surface area of 3800 Å<sup>2</sup>,  
227 which is a similar size to other cPcdh *trans* dimer interfaces (Goodman et al., 2016a; Goodman et  
228 al., 2016b; Nicoludis et al., 2016) (Figure 3B, Figure 3—figure supplement 1B). However, the 2.4  
229 Å structure had an apparently partially disrupted EC2:EC3 interface resulting in a total buried  
230 surface area of just 2900 Å<sup>2</sup> (Figure 3B). The difference between the two structures may be due to  
231 differences in the pH of the crystallization and its effect on the ionization state of the three  
232 histidines present in the EC2:EC3 interface (Figure 3B). The differences could also reflect distinct  
233 states of a dynamic interaction, as has previously been observed crystallographically (Nicoludis et  
234 al., 2016; Goodman et al., 2016b) and explored computationally for other cPcdh *trans* interactions  
235 (Nicoludis et al., 2019).

236  
237 Despite the  $\gamma$ C4 *trans* dimer sharing structural similarity and the interface having similar buried  
238 surface area as alternate  $\alpha$ ,  $\beta$ ,  $\gamma$ A, and  $\gamma$ B cPcdhs and  $\delta$ 2 non-clustered Pcdhs (Figure 3—source  
239 data 2) (Cooper et al., 2016; Goodman et al., 2016a; Goodman et al., 2016b; Harrison et al., 2020;  
240 Hudson et al., 2021; Nicoludis et al., 2016), its binding affinity is very weak. The two most  
241 structurally similar molecules to  $\gamma$ C4 over their *trans* interacting domains, cPcdh  $\gamma$ B2 and non-  
242 clustered Pcdh19.  $\gamma$ B2 and Pcdh19 have *trans* dimer  $K_{DS}$  of 21.8  $\mu$ M and 0.48  $\mu$ M respectively  
243 (Harrison et al., 2020), while that of  $\gamma$ C4 is >500  $\mu$ M. Comparison between the  $\gamma$ B2 and  $\gamma$ C4 dimer  
244 interfaces highlighted two buried charges in the  $\gamma$ C4 *trans* interface, E78 and D290, which could  
245 potentially contribute to the low interaction affinity (Figure 3C). To test this, we mutated these  
246 two residues to neutral amino acids and used AUC to determine whether the binding affinity  
247 increased: The two D290 mutations we tested, D290A and D290N, had no measurable impact on  
248 binding; but mutating E78 significantly increased the binding affinity with  $\gamma$ C4<sub>EC1-4</sub> E78A showing  
249 a  $K_D$  of 58  $\mu$ M and  $\gamma$ C4<sub>EC1-4</sub> E78Q, 83  $\mu$ M (Figure 3D, Figure 3—figure supplement 1C). The  
250 equivalent residue to E78 in  $\gamma$ B2 is also charged (D77) and forms a salt bridge with K340 in the  
251  $\gamma$ B2 dimer (Figure 3C). To assess whether generating a similar salt bridge in  $\gamma$ C4 would  
252 compensate for the negative impact of E78 on dimer affinity we generated an S344R mutant.  
253 Similar to the E78 mutants,  $\gamma$ C4<sub>EC1-4</sub> S344R also had a stronger binding affinity than wild type  
254 with a  $K_D$  of 112  $\mu$ M (Figure 3D, Figure 3-figure supplement 1C). It appears then that E78 plays

255 an important role in weakening cPcdh  $\gamma$ C4's *trans* interaction although the functional reasons for  
256  $\gamma$ C4's weak *trans* interaction are unclear.

257

### 258 ***Clustered protocadherin cis interactions are promiscuous with a range of interaction strengths***

259 To systematically investigate cPcdh *cis* interactions, we coupled *cis*-interacting fragments of  $\beta$ 9,  
260  $\gamma$ A4,  $\gamma$ A9,  $\gamma$ B2,  $\alpha$ C2,  $\gamma$ C3, and  $\gamma$ C5 to SPR chip surfaces. *Cis*-interacting fragments of three  
261 members from each of the  $\beta$ ,  $\gamma$ A, and  $\gamma$ B subfamilies ( $\beta$ 1,  $\beta$ 6,  $\beta$ 9,  $\gamma$ A3,  $\gamma$ A4,  $\gamma$ A9,  $\gamma$ B2,  $\gamma$ B5,  $\gamma$ B7)  
262 alongside  $\alpha$ C2,  $\gamma$ C3, and  $\gamma$ C5 fragments were flowed over the seven surfaces to detect their  
263 heterophilic binding (Figure 4A). Alternate  $\alpha$ -cPcdhs, and the C-types  $\alpha$ C1 and  $\gamma$ C4 were not  
264 included in this study since EC6-containing fragments of these molecules cannot be expressed,  
265 although an  $\alpha$ 7<sub>EC1-5</sub>/ $\gamma$ C3<sub>EC6</sub> chimera was included among the analytes to assess the role of  $\alpha$ 7 EC5  
266 (Figure 4—figure supplement 1C). Each of the analytes was also analyzed by AUC to determine  
267 their homophilic *cis*-interaction behavior (Figure 4—source data 1): Four analytes,  $\beta$ 1<sub>3-6</sub>,  $\gamma$ A4<sub>3-</sub>  
268  $\gamma$ A9<sub>3-6</sub>, and  $\gamma$ C3<sub>3-6</sub>, are monomeric in solution as measured by AUC, therefore their SPR binding  
269 profiles could be analyzed to determine their heterophilic binding affinities (Figure 4B, Figure 4—  
270 figure supplement 1A,B). For the remaining analytes, due to the added complexity of their  
271 homophilic *cis* interactions in solution competing with their binding to the immobilized molecules,  
272 the SPR responses could not be analyzed to determine accurate  $K_{DS}$  (Rich and Myszka, 2007).

273

274 The data clearly demonstrate a wide range of *cis* dimerization affinities with strong heterophilic  
275 binding signals (500–2000 RU), with much weaker homophilic binding responses typically  
276 between 100–140 RU. The strongest heterophilic *cis* interactions are in the sub-micromolar range;  
277 for example,  $\gamma$ C3/ $\beta$ 9 can heterophilically *cis*-dimerize with a  $K_D$  of 0.22  $\mu$ M, while  $\beta$ 9<sub>3-6</sub>,  $\gamma$ B2<sub>3-6</sub>,  
278  $\alpha$ C2<sub>2-6</sub> and  $\gamma$ C5<sub>2-6</sub> homodimerize with AUC-determined  $K_{DS}$  of 9–80  $\mu$ M. In addition to uniformly  
279 weak homophilic interactions, within-subfamily *cis* interactions were consistently among the  
280 weakest observed although a number of inter-subfamily interactions were also relatively weak  
281 (Figure 4A). For example, for the  $\beta$ 9 surface comparatively weak binding was observed for all  
282 tested  $\beta$  and  $\gamma$ A isoforms except  $\gamma$ A3, with the monomeric  $\beta$ 1,  $\gamma$ A4 and  $\gamma$ A9 producing low  
283 responses that could not be fit to a binding isotherm to calculate accurate  $K_{DS}$  (Figure 4B, Figure  
284 4—figure supplement 1B). In contrast, robust binding to the  $\beta$ 9 surface was observed for all  $\gamma$ B

285 and C-type isoforms. These data are consistent with the binding responses when  $\beta 9$  was used as  
286 an analyte over the other six surfaces, with weak to no binding observed over the  $\gamma A4$  and  $\gamma A9$   
287 surfaces and robust responses over the  $\gamma B2$ ,  $\alpha C2$ ,  $\gamma C3$ , and  $\gamma C5$  surfaces (Figure 4A). The  $\gamma A4$  and  
288  $\gamma A9$  surfaces showed a similar pattern of binding behaviors, with weak to no binding observed for  
289 the  $\gamma A$  and  $\alpha C2$  analytes, and robust binding for the  $\gamma C$ -cPcdhs with  $K_{DS}$  for  $\gamma C3_{3-6}$  of 2.73 and  
290 9.60  $\mu M$  respectively over each surface (Figure 4, Figure 4—figure supplement 1B).

291  
292 Overall, these SPR data show that cPcdh *cis* binding is generally promiscuous, with measurable  
293 *cis* interactions observed for 86% of pairs tested (using a 40 RU threshold). However, the wide range  
294 of binding responses and homo- and hetero-dimeric  $K_{DS}$  that span 0.2201  $\mu M$  to no measurable  
295 interaction in solution suggests certain *cis* dimers will form preferentially to others. For the  
296 heterophilic binding pairs for which  $K_{DS}$  could be determined (Figure 4B, Figure 4—figure  
297 supplement 1, Figure 4—figure supplement 2), the alternate cPcdhs in particular, form markedly  
298 stronger *cis* heterodimers with members of different subfamilies, particularly  $\gamma C3$  and/or  $\gamma C5$ ,  
299 compared to their homodimeric and within-subfamily interactions.  $\gamma C3$  also formed stronger  
300 heterodimers with  $\alpha C2$  than with itself or  $\gamma C5$ . Of note,  $\alpha C2$  and  $\gamma C5$  both form strong *cis*  
301 homodimers with  $K_{DS}$  of 8.9  $\mu M$  and 18.4  $\mu M$  respectively as determined from AUC experiments  
302 (Figure 4—source data 1), a magnitude similar to many of their heterodimeric interactions of 11.5  
303  $\mu M$  and 6.9–18.2  $\mu M$  respectively (Figure 4B).

304  
305 In the next section we rationalize *cis* binding preferences in terms of the structural properties of  
306 *cis* dimers.

307  
308 ***The asymmetric cis dimer interface and cis binding specificity***

309 The crystal structure of the  $\gamma B7$  *cis* dimer revealed an asymmetric interaction, with the dimer  
310 formed by one protomer engaging using surface of both EC5 and EC6 and one protomer engaging  
311 using only EC6 (Goodman et al., 2017) with regions of EC6 overlapping in both EC5–6 and the  
312 EC6-only interfaces for all cPcdh subfamilies (Thu et al., 2014; Goodman et al., 2017). The  
313 asymmetric nature of the *cis* interaction implies that for each dimer interaction there are two  
314 possible arrangements: one with protomer “1” forming the EC5–6 side and protomer “2” forming

315 the EC6-only side and the second where protomer “1” forms the EC6-only side and “2” the EC5–  
316 6 side. These two configurations are distinct with different residue:residue interactions. Alternate  
317  $\alpha$ -cPcdhs, which can only form the EC5–6 side of the *cis* dimer, require co-expression with a  
318 “carrier” cPcdh from another cPcdh subfamily, which can form the EC6-only side of the *cis* dimer,  
319 for robust delivery to the cell surface (Thu et al., 2014, Goodman et al., 2017). Although  $\alpha$ -cPcdhs  
320 and  $\gamma$ C4, which also requires a carrier for delivery to the cell surface, are likely to be extreme  
321 cases, sequence analysis alongside the low homodimerization ability of many cPcdh isoforms  
322 suggests many cPcdhs will more readily form one side of the *cis* interface than the other (Goodman  
323 et al., 2017).

324  
325 We previously suggested that  $\gamma$ A-cPcdhs will prefer to form the EC6-only side of the interface  
326 since they have a poorly conserved EC5 interface and do not form strong homodimers in solution  
327 (Figure 4—source data 1) (Goodman et al., 2017). The C-type cPcdh  $\gamma$ C3 also does not form *cis*  
328 homodimers in solution. However, as shown in Figure 4,  $\gamma$ A-cPcdhs form strong heterodimers  
329 with  $\gamma$ C3 with dissociation constants in the low-micromolar range (Figure 4B and Figure 4—figure  
330 supplement 1B). Structure-guided sequence analysis for the  $\gamma$ A4/ $\gamma$ C3 dimer in both EC6-only and  
331 EC5–6 possible orientations, using the available crystal structures of the  $\gamma$ B7<sub>EC3–6</sub> *cis* dimer and  
332 monomeric  $\gamma$ A4<sub>EC3–6</sub> (Figure 5A and Figure 5—figure supplement 1), suggests that  $\gamma$ C3 prefers to  
333 form the EC5–6 side:  $\gamma$ C3 has a number of residue differences in interface residues that are  
334 conserved among  $\beta$ ,  $\gamma$ A and  $\gamma$ B cPcdhs (V/L555, R/K558, W/V562, and S/R595) that seem likely  
335 to disfavor the EC6-only side of the interface and favor the EC5–6 side (Figure 5—figure  
336 supplement 1B,C). Two of these residues, V555 and S595, result in a potential loss of EC6-only  
337 interface buried surface area and are shared with  $\alpha$ -cPcdhs, which cannot occupy the EC6-only  
338 position (Goodman et al., 2017). Structural analysis further suggests that  $\gamma$ C3-specific residue  
339 R558 would not be well accommodated from the EC6-only side, potentially causing van der Waals  
340 clashes (Figure 5—figure supplement 1C). By contrast, from the EC5–6 side R558 is positioned  
341 to form an additional salt bridge with  $\gamma$ A4 residue E544 and a hydrogen bond with Y532,  
342 promoting dimer formation (Figure 5A; Figure 5—figure supplement 1B).  $\gamma$ A4 residue E544 is  
343 positioned to form this salt bridge due to the EC6 A/A' loop region adopting a different

344 arrangement in the  $\gamma$ A4 crystal structure to that observed for  $\gamma$ B2 and  $\gamma$ B7 in their respective crystal  
345 structures (Goodman et al., 2016c; Goodman et al., 2017).

346  
347 Based on our analysis, we generated mutants of both  $\gamma$ A4 and  $\gamma$ C3 targeting the EC6-only side of  
348 the interface and used size exclusion-coupled multi-angle light scattering (SEC-MALS) to assess  
349 their preferred orientation on  $\gamma$ A4/ $\gamma$ C3 heterodimerization. In SEC-MALS wild type  $\gamma$ A4<sub>EC3-6</sub> and  
350  $\gamma$ C3<sub>EC3-6</sub> behave as monomers when run alone, and form a dimer when mixed in equimolar  
351 amounts (Figure 5B; Figure 5—figure supplement 2A). The V560R mutation ( $\gamma$ B7 numbering, see  
352 methods for sequence alignment) is based on EC6-only impaired  $\alpha$ -cPcdhs, and has been  
353 previously shown to block  $\gamma$ B6's homophilic *cis* interaction in solution (Goodman et al., 2017).  
354  $\gamma$ A4 V560R did not dimerize with wild-type  $\gamma$ C3, whereas  $\gamma$ C3 V560R could still dimerize with  
355 wild type  $\gamma$ A4 (Figure 5B). Therefore impairing  $\gamma$ A4's EC6-only interface blocks  $\gamma$ A4/ $\gamma$ C3 dimer  
356 formation while impairing  $\gamma$ C3's EC6-only interface does not (although the dimerization appears  
357 to be weaker compared to the wild type  $\gamma$ A4/ $\gamma$ C3 *cis* interacting pairs). We also generated a  $\gamma$ C3-  
358 like mutant of  $\gamma$ A4, K558R, which also targets the EC6-only interface. Like  $\gamma$ A4 V560R,  $\gamma$ A4  
359 K558R also did not dimerize with wild type  $\gamma$ C3 in MALS and, when replicated, in SPR  
360 experiments (Figure 5B, Figure 5—figure supplement 2B). The reverse mutation in  $\gamma$ C3, R558K,  
361 inhibited dimerization with wild type  $\gamma$ A4 (Figure 5B). Therefore, like the  $\alpha$ -specific R560 residue,  
362  $\gamma$ C3-specific R558 has distinct effects on dimerization when in  $\gamma$ A4 or  $\gamma$ C3, inhibiting  
363 heterodimerization when mutated into  $\gamma$ A4 but promoting heterodimerization in  $\gamma$ C3. Together  
364 these data suggest that the  $\gamma$ A4/ $\gamma$ C3 dimer has a preferred orientation, with  $\gamma$ A4 predominantly  
365 occupying the EC6-only position and  $\gamma$ C3 the EC5-6 side. Our data also account for the fact that  
366 neither isoform homodimerizes in solution since the EC5-6 side would be impaired in the  $\gamma$ A4  
367 homodimer while the EC6 side would be impaired in the  $\gamma$ C3 homodimer.

368  
369 Next, we sought to test whether  $\gamma$ A4 and  $\gamma$ C3 preferentially adopt these specific positions in *cis*  
370 interactions with a  $\gamma$ B isoform. To accomplish this we generated mutants of  $\gamma$ B7 individually  
371 targeting the EC6-only interaction surface,  $\gamma$ B7 Y532G, and the EC5-6 side,  $\gamma$ B7 A570R,  
372 respectively (Goodman et al., 2017) (Figure 4—source data 1). In SPR,  $\gamma$ B7 Y532G had only a

373 small impact on  $\gamma$ A4 binding, while  $\gamma$ B7 A570R abolished  $\gamma$ A4 binding (Figure 5C). In contrast,  
374  $\gamma$ B7 Y532G prevented  $\gamma$ C3 binding while  $\gamma$ B7 A570R showed robust  $\gamma$ C3 binding (Figure 5C).  
375 These results suggest that  $\gamma$ A4/ $\gamma$ B7 and  $\gamma$ C3/ $\gamma$ B7 *cis* heterodimers also have preferred orientations  
376 with  $\gamma$ A4 and  $\gamma$ C3 maintaining their preferences for the EC6-only and EC5–6 positions  
377 respectively. Additionally, SPR data for the  $\gamma$ B7 mutants over the  $\alpha$ C2 surface suggests  $\alpha$ C2  
378 preferentially occupies the EC6-only side in  $\alpha$ C2/ $\gamma$ B7 dimers (Figure 5C). This is notable since  
379  $\alpha$ C2 forms robust *cis*-homodimers and therefore, like  $\gamma$ B7, can presumably readily occupy both  
380 positions in its homophilic interactions, implying that the  $\alpha$ C2/ $\gamma$ B7 orientation preference could  
381 be specific to the particular heterodimer pairing. However, since this interpretation is based on a  
382 single mutation further interrogation of  $\alpha$ C2's interactions would be required to be conclusive. A  
383 broader examination of orientation preferences among *cis* dimer pairings beyond those of  
384 molecules with weak *cis* homodimer affinities, such as  $\gamma$ A4 and  $\gamma$ C3 examined here, could be  
385 instructive.

386

## 387 **Discussion**

388 *Trans specificity* - The results of this study add to our current understanding of cPcdhs in a number  
389 of ways. First, they reveal a remarkable level of specificity in *trans* homophilic interactions in the  
390 sense that in no case was a heterophilic *trans* interaction detected in our SPR measurements. Prior  
391 data has clearly indicated that cPcdhs exhibit a preference for homophilic *trans* interactions but  
392 the extent of this specificity was not established in quantitative terms but were, rather, based on  
393 cell aggregation experiments. The SPR experiments with cPcdhs reported here show no evidence  
394 of cross-interaction between non-identical cPcdh isoforms. This level of specificity is unusual for  
395 cell-cell recognition proteins, as significant intra-family interactions are evident in most other  
396 families examined to date including type I cadherins (Katsamba et al., 2009; Vendome et al., 2014),  
397 type II cadherins (Brasch et al., 2018), DIPs and Dprs (Cosmanescu et al., 2018), sidekicks  
398 (Goodman et al., 2016c), and nectins (Harrison et al., 2012). Even the non-clustered  $\delta$ -  
399 protocadherins, which are preferentially homophilic and utilize an antiparallel EC1–4 interface  
400 like the cPcdhs (Cooper et al., 2016; Harrison et al., 2020; Modak and Sotomayor, 2019), show

401 heterophilic intra-family *trans* interactions, though they show no cross-reactivity with cPcdhs  
402 (Harrison et al., 2020).

403

404 High fidelity homophilic interaction is a strict requirement of the chain termination model for the  
405 barcoding of vertebrate neurons and has been accomplished through the exploitation of a  
406 multidomain interface of almost 4000 Å<sup>2</sup> (Nicoludis et al., 2019) that enables the positioning of  
407 enough “negative constraints” (Sergeeva et al., 2020) to preclude the dimerization of about 1600  
408 heterophilic pairs of 58 mouse cPcdh isoforms (Rubinstein et al., 2017). Dscams accomplish the  
409 same task for thousands of isoforms by exploiting the combinatorics made possible by a three-  
410 domain interface where each domain interacts largely independently with an identical domain on  
411 its interacting partner (see discussion in (Zipursky and Grueber, 2013)). Although it is likely that  
412 Dscams dimerize with a comparable level of homophilic specificity to that of cPcdhs, the evidence  
413 is based on a semi-quantitative ELISA-type assay of recombinant multimerized isoforms  
414 (Wojtowicz et al., 2007) and AUC experiments on a few select isoforms (Wu et al., 2012).

415

416 *Cis interactions* – Despite early evidence that *cis* interactions are promiscuous, the data reported  
417 here indicate that this generalization needs to be significantly refined. Functional mutagenesis  
418 studies have already established that alternate  $\alpha$  cPcdhs and the C-type  $\gamma$ C4 do not form intra-  
419 subtype *cis* interactions and can only reach the cell surface when mediated by heterophilic *cis*  
420 interactions with members of other subtype families (Goodman et al., 2017; Thu et al., 2014). The  
421 data presented in Figure 4 indicate that this is an extreme example of quite general behavior: intra-  
422 subtype *cis* interactions are invariably weaker than inter-subtype interactions. However, unlike  $\alpha$   
423 cPcdhs, most cPcdhs can reach the cell surface on their own. This includes  $\beta$ 1, all  $\gamma$ A-Pcdhs, and  
424  $\gamma$ C3 which do not form measurable homodimeric *cis* interactions in our solution-based AUC  
425 experiments. We have attributed this to their presence on the restricted 2D surface of membranes  
426 which can promote *cis*-dimerization (Wu et al., 2013) whereas biophysical experiments are carried  
427 out in a 3D solution environment (Goodman et al., 2016b). (There may of course be other, still  
428 undetermined, factors involved in cPcdh cell surface transport (Phillips et al., 2017).) Therefore,  
429 although our biophysical experiments demonstrate that intra-subtype *cis* interactions are  
430 comparatively weak and, in some cases undetectable in solution, intra-subtype *cis* dimers likely  
431 assemble when constrained in more native membrane environments. As such, while  $\alpha$  cPcdhs and



432  $\gamma$ C4 are obligate participants in *cis*-heterodimers, at least in their cell surface transport, our data  
433 show that the remaining cPcdhs are preferentially, although not exclusively, participants in *cis*-  
434 heterodimers.

435  
436 The *cis* binding preferences indicated by our data can be largely understood in terms of the  
437 asymmetric interface discussed above. Specifically, different isoforms preferentially form one side  
438 of the *cis* dimer: for example, the EC6-only side for cPcdh- $\gamma$ A4 and the EC5–6 side for cPcdh-  
439  $\gamma$ C3. Homodimerization requires participation of single isoform on both sides of an interface  
440 posing challenges in the optimization of binding affinities since, in some cases, the same residue  
441 must participate in different intermolecular interactions. Given significant sequence conservation  
442 in all members of an alternate cPcdh subfamily (Figure 4—figure supplement 3) even intra-  
443 subfamily heterophilic interactions are more difficult to optimize relative to inter-subfamily  
444 heterodimerization where there are no constraints on the two interacting surfaces. Additionally,  
445 the robust cell surface delivery of many cPcdhs in cells expressing only a single isoform also  
446 suggests that all carrier isoforms –  $\beta$ -,  $\gamma$ A-, and  $\gamma$ B-cPcdhs, plus C-types  $\alpha$ C2,  $\gamma$ C3, and  $\gamma$ C5 – can  
447 fill both the EC6 and EC5–6 roles, as *cis*-dimer formation is thought to be required for cell surface  
448 export (Goodman et al., 2017; Goodman et al., 2016b; Thu et al., 2014). Therefore side preferences  
449 are most likely not absolute for carrier cPcdh isoforms and may vary among individual isoform  
450 and/or subtype pairings.

451  
452 *Functional implications of cPcdh interactions* – The functional role of precise *trans* homophilic  
453 specificity in ensuring high fidelity discrimination between neuron self and non-self has been  
454 discussed previously (Rubinstein et al., 2017; Rubinstein et al., 2015) and is summarized above. It  
455 is an essential feature of the chain termination model. The role of promiscuous *cis* interactions can  
456 also be understood in terms of this model in that *cis* promiscuity enables the formation of a large  
457 and diverse set of *cis* dimers that can only form long molecular zippers when all isoforms are  
458 matched. However, the results of this study reveal strong preferences for inter-subgroup  
459 heterophilic interactions whose biological rationale is uncertain. cPcdhs from the three subfamilies  
460 have been shown to act cooperatively in certain neuronal contexts although whether this relates to  
461 their *cis* interactions is unknown (Hasegawa et al., 2016; Ing-Esteves et al., 2018).

462

463 One possible advantage of weak homophilic *cis* interactions would be to ensure that once reaching  
464 the cell surface a diverse set of *cis* dimers forms. This explanation implicitly assumes that most  
465 isoforms (except for  $\alpha$ -Pcdhs and  $\gamma$ C4) reach the surface as homodimers that must then quickly  
466 dissociate and form more stable heterodimers. Another explanation posits that homotypic zippers  
467 consisting solely of *cis*-homodimers are kinetically easier to form than heterotypic zippers since  
468 in a homotypic zipper, either “wing” of the new *cis* dimer can form *trans* interactions with the  
469 wing at the chain terminus. In contrast, in a hetero-dimeric zipper, only one wing can form  
470 homophilic interactions with the chain terminus (Figure 1D). A preference for homotypic zippers  
471 would then reduce the diversity required in the chain termination model since, in this model, it is  
472 essential that all isoforms be incorporated into a growing zipper. The formation of long homotypic  
473 zippers might lead to a repulsive phenotype even when mismatches are present.

474  
475 However, these explanations would not fully account for interfamily heterophilic preferences. One  
476 possibility is suggested by the observation that C-types are often highly expressed compared to  
477 alternate cPcdhs, for example in Purkinje cells (Esumi et al., 2005; Kaneko et al., 2006). To ensure  
478 sufficient diversity in growing zippers, it would then be important to ensure that zippers that are  
479 formed are not overly enriched in C-type isoforms as would be accomplished through preferential  
480 heterophilic *cis* interactions. This same logic would also pertain to alternate cPcdhs in cases where  
481 one subfamily is more heavily expressed than another.

482  
483 C-type cPcdhs have different functions than alternate cPcdhs and these are reflected in different  
484 expression patterns. For example,  $\alpha$ C2 can be alone responsible for tiling (Chen et al., 2017) (Of  
485 note, in the chain termination model, a completely homophilic zipper is sufficient to initiate self-  
486 avoidance facilitating tiling). On the other hand  $\gamma$ C4, which has a unique and crucial role in  
487 neuronal survival (Garrett et al., 2019), requires co-expression with another cPcdh isoform for  
488 robust cell surface expression and therefore is likely unable to act in isolation (Thu et al., 2014).  
489 Furthermore, as detailed above,  $\gamma$ C4 has a much weaker *trans* interaction affinity than any other  
490 cPcdh isoform measured to date, although it is still able to mediate cell aggregation when delivered  
491 to the cell surface (Thu et al., 2014). The presence of E78 appears in large part to be responsible  
492 for this weak affinity. It is unclear whether  $\gamma$ C4’s weak *trans* affinity plays any functional role,  
493 although a weak homodimer interaction may facilitate extracellular interactions with other,

494 currently unidentified, proteins. More generally, it seems likely that different intracellular  
495 interactions account for the specialized functions of C-type Pcdhs. The cytoplasmic domain plays  
496 an important role in the activation of Wnt, WAVE, and other signaling cascades (Chen et al., 2009;  
497 Fukuda et al., 2008; Keeler et al., 2015; Mah and Weiner, 2017; Onouchi et al., 2015; Pancho et  
498 al., 2020). In some cases, the cytoplasmic domains of a subset or even a single cPcdh isoform  
499 activates a specific signaling cascade. For example, cPcdh  $\gamma$ C3 is the only isoform able to interact  
500 and inhibit Axin1, a Wnt pathway activator (Mah et al., 2016). Of note,  $\gamma$ -cPcdh intracellular  
501 domains consist of a C-terminal constant region common to all  $\gamma$  isoforms (including the three  $\gamma$   
502 C-types) and a membrane-proximal variable region consisting of ~100 residues that could account  
503 for the unique intracellular interactions and signaling of individual isoforms. Additionally it is  
504 possible that extracellular interactions to molecules from other families, such as Neuroligins, may  
505 account for some distinctions in function (Molumby et al., 2017; Steffen et al., 2021).

506  
507 Overall, the results of this study demonstrate the remarkable tuning of the interactions among  
508 clustered protocadherin family members: homophilic *trans* interactions are remarkably specific  
509 despite the high level of sequence identity among family members while *cis* interactions, though  
510 somewhat promiscuous, also appear designed to have binding preferences of still uncertain  
511 function. These binding properties match requirements of the “isoform-mismatch chain-  
512 termination model” for neuronal self-vs-non-self discrimination in which all expressed cPcdh  
513 isoforms assemble into intercellular zippers formed by alternating promiscuous *cis* and matched  
514 *trans* interactions with assembly size dictated by the presence or absence of mismatched isoforms.  
515 It remains to be seen whether such assemblies can be observed *in vivo* and how they control  
516 downstream signaling pathways.

## 517 **Materials and Methods**

### 518 **Protein production and purification**

519 cDNAs for cPcdh ectodomain fragments, excluding the predicted signal sequences, were cloned  
520 into a p $\alpha$ SHP-H mammalian expression vector (a kind gift from Daniel J. Leahy, John Hopkins  
521 University) modified with the human Binding immunoglobulin protein (BiP;  
522 MKLSLVAAMLLLLSAARA) signal sequence and a C-terminal octa-histidine tag (Rubinstein et  
523 al., 2015). The signal sequences were predicted using the SignalP 4.0 server (Petersen et al., 2011).  
524 Point mutations were introduced into cDNA constructs using the KOD hot start polymerase  
525 (Novagen) following the standard Quikchange protocol (Stratagene).

526  
527 Suspension-adapted HEK293 Freestyle cells (Invitrogen) in serum free media (Invitrogen) grown  
528 and maintained at 37 °C and 10% carbon dioxide were used for protein expression. The plasmid  
529 constructs were transfected into cells using polyethyleneimine (Polysciences Inc.) (Baldi et al.,  
530 2012). Media was supplemented with 10 mM CaCl<sub>2</sub> 4 hours after transfection. Conditioned media  
531 was harvested ~6 days after transfection and the secreted proteins were purified using batch nickel-  
532 nitrilotriacetic acid (Ni-NTA) affinity chromatography followed by size exclusion  
533 chromatography over Superdex 200 26/60 column (Cytiva) on an AKTA pure fast protein liquid  
534 chromatography system (Cytiva). Purified proteins were concentrated to >2 mg/ml in 10 mM Tris-  
535 Cl pH 8.0, 150 mM NaCl, 3 mM CaCl<sub>2</sub>, and 100–250 mM imidazole pH 8.0 and stored at 4 °C for  
536 short-term use or flash frozen in liquid nitrogen for long-term storage at –80 °C.

537  
538 Constructs encoding biotinylated cPcdh fragments for immobilization in SPR experiments were  
539 prepared by insertion of an Avi-tag (GLNDIFEAQKIEWHE)-encoding sequence between the  
540 octa-histidine tag and stop codon. These were co-transfected with a plasmid encoding the biotin-  
541 Ligase BirA from *E. coli* (Lys2–Lys321) with a BiP signal sequence and a C-terminal endoplasmic  
542 reticulum-retention signal (DYKDEL) (Barat and Wu, 2007). The expression and BirA plasmids  
543 were mixed at a 9:1 ratio for transfection and 50  $\mu$ M Biotin (Sigma) was added to the media 4 h  
544 post-transfection. Purification was carried out exactly as for the non-biotinylated constructs and  
545 biotinylation was confirmed by western blot using NeutrAvidin-HRP (ThermoFisher).

546

547 **Sedimentation equilibrium analytical ultracentrifugation (AUC)**

| Protein                                            | Imidazole pH 8.0 (mM) | Spin speeds (rpm)          |
|----------------------------------------------------|-----------------------|----------------------------|
| $\alpha$ 4 EC1–5                                   | 100                   | 9000, 11000, 13000, 15000  |
| $\alpha$ 7 EC1–5 L301R                             | 100                   | 9000, 11000, 13000, 15000  |
| $\alpha$ 12 EC1–5 ( <i>poorly behaved</i> )        | 200                   | 11000, 14000, 17000, 20000 |
| $\gamma$ B4 EC1–5                                  | 200                   | 11000, 14000, 17000, 20000 |
| $\gamma$ B5 EC1–4-AVI                              | 200                   | 11000, 14000, 17000, 20000 |
| $\gamma$ C5 EC1–5 S116R                            | 200                   | 11000, 14000, 17000, 20000 |
| $\beta$ 6 EC1–4                                    | 100                   | 9000, 11000, 13000, 15000  |
| $\beta$ 6 EC1–4-AVI tag                            | 200                   | 11000, 14000, 17000, 20000 |
| $\beta$ 6 EC1–4 R41N                               | 200                   | 11000, 14000, 17000, 20000 |
| $\beta$ 6 EC1–4 S117I                              | 200                   | 11000, 14000, 17000, 20000 |
| $\beta$ 6 EC1–4 L125P                              | 200                   | 11000, 14000, 17000, 20000 |
| $\beta$ 6 EC1–4 E369K                              | 200                   | 11000, 14000, 17000, 20000 |
| $\beta$ 6 EC1–4 Y371F                              | 200                   | 11000, 14000, 17000, 20000 |
| $\beta$ 6 EC1–4 R41N/S117I ( <i>precipitates</i> ) | 200                   | 11000, 14000, 17000, 20000 |
| $\beta$ 6 EC1–4 R41N/E369K                         | 200                   | 11000, 14000, 17000, 20000 |
| $\beta$ 6 EC1–4 S117I/L125P                        | 200                   | 11000, 14000, 17000, 20000 |
| $\beta$ 6 EC1–4 R41N/S117I/L125P                   | 200                   | 11000, 14000, 17000, 20000 |
| $\beta$ 6 EC1–4 R41N/S117I/E369K                   | 200                   | 11000, 14000, 17000, 20000 |
| $\beta$ 6 EC1–4 R41N/E369K/Y371F                   | 200                   | 11000, 14000, 17000, 20000 |
| $\beta$ 6 EC1–4 R41N/S117I/L125P/ E369K/Y371F      | 200                   | 11000, 14000, 17000, 20000 |
| $\beta$ 1 EC3–6                                    | 200                   | 12000, 16000, 20000, 24000 |
| $\beta$ 6 EC1–6                                    | 250                   | 9000, 11000, 13000, 15000  |
| $\beta$ 9 EC3–6                                    | 200                   | 11000, 14000, 17000, 20000 |
| $\gamma$ A3 EC3–6                                  | 200                   | 11000, 14000, 17000, 20000 |
| $\gamma$ A9 EC3–6                                  | 200                   | 11000, 14000, 17000, 20000 |
| $\gamma$ B7 EC3–6 A570R                            | 200                   | 13000, 17000, 21000, 25000 |
| $\alpha$ C2 EC3–6-AVI tag                          | 200                   | 11000, 14000, 17000, 20000 |
| $\gamma$ C5 EC2–6                                  | 250                   | 9000, 11000, 13000, 15000  |
| $\gamma$ C4 EC1–4                                  | 250                   | 11000, 14000, 17000, 20000 |
| $\gamma$ C4 EC1–4 D290A                            | 250                   | 11000, 14000, 17000, 20000 |
| $\gamma$ C4 EC1–4 D290N                            | 250                   | 11000, 14000, 17000, 20000 |
| $\gamma$ C4 EC1–4 E78A                             | 250                   | 11000, 14000, 17000, 20000 |
| $\gamma$ C4 EC1–4 E78Q                             | 250                   | 11000, 14000, 17000, 20000 |
| $\gamma$ C4 EC1–4 S344R                            | 250                   | 11000, 14000, 17000, 20000 |

548 Experiments were performed in a Beckman XL-A/I analytical ultracentrifuge (Beckman-Coulter,  
549 Palo Alto CA, USA), utilizing six-cell centerpieces with straight walls, 12 mm path length and  
550 sapphire windows. Protein samples were dialyzed overnight and then diluted in 10 mM Tris-Cl  
551 pH 8.0, 150 mM NaCl, 3 mM CaCl<sub>2</sub> with 100–250 mM imidazole pH 8.0, as detailed in the above  
552 table. The samples were diluted to an absorbance of 0.65, 0.43 and 0.23 at 10 mm and 280 nm in  
553 channels A, B and C, respectively. For each sample, buffer was used as blank. The samples were  
554 run in duplicate at four speeds as detailed in the above table. The lowest speed was held for 20 h

555 then four scans were conducted with 1 h interval, the subsequent three speeds were each held for  
556 10 h followed by four scans with 1 hour interval each. Measurements were taken at 25 °C, and  
557 detection was by UV at 280 nm or interference. Solvent density and protein  $\bar{v}$  at both  
558 temperatures were determined using the program SednTerp (Alliance Protein Laboratories, Corte  
559 Cancion, Thousand Oaks, CA, USA). The molecular weight of each protomer used in AUC  
560 experiments, was determined by MALDI mass spectrometry. For calculation of dimeric  $K_D$  and  
561 apparent molecular weight, all data were used in a global fit, using the program HeteroAnalysis,  
562 ([www.biotech.uconn.edu/auf](http://www.biotech.uconn.edu/auf)). Calculation of the tetramer  $K_{dS}$  was done with the program Sedphat  
563 (<http://www.analyticalultracentrifugation.com/sedphat/index.htm>).

564

### 565 **Surface plasmon resonance (SPR) binding experiments**

566 SPR binding experiments were performed using a Biacore T100 biosensor equipped with a Series  
567 S CM4 sensor chip, immobilized with NeutrAvidin over all four flow cells. NeutrAvidin  
568 immobilization was performed in HBS-P buffer, pH 7.4 at 32 °C, over all four surfaces using  
569 amine-coupling chemistry as described in Katsamba et al. (2009), resulting in approximately  
570 10,000 RU of NeutrAvidin immobilized (Katsamba et al., 2009). Binding experiments were  
571 performed at 25 °C in a running buffer containing 10 mM Tris-Cl pH 8.0, 150 mM NaCl, 3 mM  
572 CaCl<sub>2</sub>, 20 mM imidazole, 0.25 mg/mL BSA and 0.005% (v/v) Tween-20 unless otherwise noted.

573

574 C-terminal biotinylated fragments were tethered over individual NeutrAvidin-immobilized flow  
575 cells (shown in the left column of each Figures 2, 4, 5C, Figure 2—figure supplement 1, Figure  
576 2—figure supplement 2B, Figure 4—figure supplement 1 and Figure 5—figure supplement 2B) at  
577 2300–3000 RU, depending on the experiment, using a flow rate of 20  $\mu$ L/min. A NeutrAvidin-  
578 immobilized flow cell was used as a reference in each experiment to subtract bulk refractive index  
579 changes. The analytes tested in each experiment are listed at the top row. All analytes (with  
580 exceptions for the *cis* interacting pairs  $\gamma C_{3-6}/\beta 9_{3-6}$ , in both orientations, and  $\beta 6_{1-6}/\gamma C_{3-6}$  in Figure  
581 4A, discussed below) were tested at six concentrations ranging between 24, 8, 2.667, 0.889, 0.296,  
582 and 0.099  $\mu$ M, prepared using a three-fold dilution series.  $\gamma C_{3-6}$  binding over  $\beta 9_{3-6}$  (Figure 4A)  
583 was tested at five concentrations from 8–0.099  $\mu$ M.

584 For all experiments, analyte samples were injected over the captured surfaces at 50  $\mu\text{L}/\text{min}$  for 40  
585 s, followed by 180 s of dissociation phase, a running buffer wash step and a buffer injection at 100  
586  $\mu\text{L}/\text{min}$  for 60 s. Protein samples were tested in order of increasing concentration, and within the  
587 same experiment the entire concentration series was repeated to confirm reproducibility. Every  
588 three binding cycles, buffer was used as an analyte instead of a protein sample to double reference  
589 the binding responses by removing systematic noise and instrument drift. The resulting binding  
590 curves were normalized for molecular weight differences according to data provided by mass spec  
591 for each molecule. The data was processed using Scrubber 2.0 (BioLogic Software). To provide  
592 an estimate of the number of possible heterophilic binding pairs, we have used a cut-off of 40RU,  
593 which is the lowest signal that can be observed for a homodimeric *cis* fragment pair,  $\gamma\text{B}_{2-6}$ .

594  
595 In Figure 4A,  $\beta_{61-6}$  and  $\beta_{93-6}$  were tested over  $\gamma\text{C}_{3-6}$  at six concentrations ranging from 900 to 3.7  
596 nM, which is 27-fold lower than the other interactions, prepared using a three-fold dilution series  
597 in a running buffer containing increased concentrations of imidazole (100 mM) and BSA (0.5  
598 mg/mL) to minimize nonspecific interactions. For these two interactions, although analyte samples  
599 were injected over the captured surfaces at 50  $\mu\text{L}/\text{min}$  for 40s, the dissociation phase was  
600 monitored for 300s to provide additional time for complex dissociation. Nevertheless, higher  
601 analyte concentrations produced binding profiles that were not reproducible, most likely due to the  
602 fact that bound complexes could not dissociate completely at these higher concentrations.

603  
604 For the calculation of heterophilic  $K_{\text{DS}}$  for the monomeric *cis* fragments  $\beta_{13-6}$ ,  $\gamma\text{A}_{43-6}$ ,  $\gamma\text{A}_{93-6}$  and  
605  $\gamma\text{C}_{3-6}$  over each of the six surfaces, except  $\beta_{93-6}$ , the duplicate binding responses were fit globally,  
606 using an 1:1 interaction model and a single  $K_{\text{D}}$  was calculated as the analyte concentration that  
607 would yield 0.5  $R_{\text{max}}$  and a fitting error, indicated in brackets.  $K_{\text{DS}}$  lower than 24  $\mu\text{M}$  were  
608 calculated using an independent  $R_{\text{max}}$ . For  $K_{\text{DS}}$  greater 24  $\mu\text{M}$ , the  $R_{\text{max}}$  was fixed to a global value  
609 determined by the  $R_{\text{max}}$  of a different cPcdh analyte tested over the same surface during the same  
610 experiment that showed binding above 50% and therefore produced a more accurate  $R_{\text{max}}$ . For  $K_{\text{DS}}$   
611  $>50 \mu\text{M}$ , a lower limit is listed since at the analyte concentrations used, (0.098-24  $\mu\text{M}$ ), accurate  
612  $K_{\text{DS}}$  could not be determined, even when the  $R_{\text{max}}$  is fixed. NB (No Binding) represents  
613 interactions that did not yield any binding signal. The binding curves of  $\gamma\text{C}_{3-6}$  over the  $\beta_{93-6}$  did  
614 not come to equilibrium during the time-course of the experiment, so a kinetic analysis was

615 performed to calculate a  $K_D$  (Figure 4—figure supplement 1A). Binding of  $\gamma C3_{3-6}$  was tested using  
616 a concentration range of 900–0.411 nM prepared using a three-fold dilution series in a running  
617 buffer containing increased concentrations of imidazole (100 mM) and BSA (0.5 mg/mL) to  
618 minimize any nonspecific interactions. Protein samples were injected over the captured surfaces  
619 at 50  $\mu$ L/min for 90 s, followed by 420 s of dissociation phase, a running buffer wash step and a  
620 buffer injection at 100  $\mu$ L/min for 60 s. Protein samples were tested in order of increasing  
621 concentration in triplicate to confirm reproducibility. Every three binding cycles, buffer was used  
622 as an analyte instead of a protein sample to double reference the binding responses by removing  
623 systematic noise and instrument drift. The binding data was analyzed using a 1:1 interaction  
624 model to calculate the kinetic parameters and the  $K_D$ .

625

### 626 **K562 cell aggregation assays**

627 Full-length cPcdhs  $\beta 6$  and  $\beta 8$  cDNAs were cloned into the pMax expression vectors encoding C-  
628 terminal mCherry or mVenus tagged cPcdh proteins, then transfected into K562 cells (ATCC  
629 CCL243) as previously described (Goodman et al., 2017; Thu et al., 2014). Point mutants were  
630 generated using the QuikChange method (Stratagene). In brief, K562 cells were cultured at 37 °C  
631 with 5% CO<sub>2</sub> in DMEM with GlutaMAX (GIBCO) supplemented with 10% FBS and 1%  
632 penicillin-streptomycin for two days. Next, cells were counted, centrifuged, and resuspended at a  
633 density of  $\sim 1.5 \times 10^4$  cells/ $\mu$ L in SF Cell Line 4D-Nucleofector Solution SF with supplement  
634 according to manufacturer instructions (Lonza). 2  $\mu$ g of each Pcdh expression construct were  
635 transfected into 20  $\mu$ L of the K562 cell suspension by electroporation using an Amaxa 4D-  
636 Nucleofector (Lonza). Transfected cells were transferred to a 24-well plate in 500  $\mu$ L of medium  
637 per well and incubated overnight at 37°C and 5% CO<sub>2</sub>. Cells then were mixed, re-incubated with  
638 gentle rocking for 4 hours, then imaged with an Olympus IX73 fluorescent microscope to  
639 determine the extent of aggregation.

640

### 641 **Size-exclusion coupled multi-angle light scattering (SEC–MALS)**

642 SEC-MALS experiments were performed using a Superdex 200 Increase 3.2/300 size exclusion  
643 column on an AKTA FPLC system (Cytiva) coupled to inline static light scattering (Dawn Heleos  
644 II, Wyatt Technology), differential refractive index (Optilab rEX, Wyatt Technology) and UV  
645 detection. Purified cPcdh proteins were diluted to 18  $\mu$ M in running buffer (150 mM NaCl, 10 mM



646 Tris-Cl pH 8, 3 mM CaCl<sub>2</sub>, 200 mM Imidazole pH 8) and 50 or 100 μl samples were run at a flow  
647 rate of 0.5 ml/min at room temperature. Mixtures of cPcdh fragments were prepared in the same  
648 buffer at final concentrations of 18 μM for each protein and run under the same conditions. Data  
649 were analyzed using ASTRA software (Wyatt Technologies).

650

651 During SEC-MALS experiments, a dimer/monomer equilibrium is established as proteins move  
652 through the size exclusion chromatography column, which is influenced by the K<sub>D</sub> of the  
653 interaction. The concentrations used in the current experiments (18 μM for each cPcdh fragment),  
654 although above the K<sub>D</sub> of 3 μM for the γC3/γA4 *cis* interaction, are not sufficiently high for all the  
655 *cis* fragments to be bound into heterodimers, leaving a significant population of molecules as  
656 monomers, resulting in apparent molecular weights of ~76 kDa for the dimeric species compared  
657 to the predicted molecular weight for a dimer of ~108 kDa. For the γA4 + γC3 V560R mixture, a  
658 lower K<sub>D</sub> allows for only a small proportion of molecules to assemble into heterodimers at 18 μM,  
659 therefore the dimer and monomer peaks elute at different volumes and are completely resolved.

660

### 661 **X-ray crystallography**

662 Crystallization screening of γC4<sub>1-4</sub> using the vapor diffusion method yielded two protein crystal  
663 forms: The first crystal form crystals were grown using a protein concentration of 7 mg/ml in 10%  
664 (w/v) PEG8000, 20% ethylene glycol, 10% Morpheus Amino Acids (Molecular Dimensions), and  
665 0.1 M Morpheus Buffer System 2 (Hepes/MOPS buffer; Molecular Dimensions) pH 7.5. No  
666 additional cryoprotection was required for this crystal form. The second crystal form crystals were  
667 grown using a protein concentration of 7 mg/ml in 1 M LiCl, 0.1 M Mes pH 6.0, and 10% (w/v)  
668 PEG6000. The crystal used for data collection was cryo-protected in the crystallization condition  
669 plus 30% (w/v) glycerol. X-ray diffraction data for each crystal form were collected at 100K from  
670 single crystals at Northeastern Collaborative Access Team (NE-CAT) beamline 24ID-E at the  
671 Advanced Photon Source, Argonne National Laboratory.

672

### 673 ***γC4<sub>1-4</sub> crystal form 1: Diffraction anisotropy and pseudosymmetry***

674 The X-ray diffraction data for the first crystal form showed strong diffraction anisotropy, with  
675 relatively strong diffraction along c\* and much weaker diffraction along a\* and b\* (Figure 3—  
676 figure supplement 1A). These data were therefore truncated using ellipsoidal limits with using a

677 3.0 F/sigma cut-off along each of the three principal crystal axes as implemented in the UCLA  
678 Diffraction Anisotropy Server (Strong et al., 2006) to 4.6/3.9/3.5 Å. The completeness within the  
679 applied ellipsoidal resolution limits was 96.8% (Figure 3—source data 1).

680

#### 681 *$\gamma$ C<sub>41-4</sub> crystal form 1: Crystal structure phasing and refinement*

682 The  $\gamma$ C<sub>41-4</sub> crystal structure was solved by molecular replacement using Phaser (McCoy et al.,  
683 2007), implemented in CCP4 (Winn et al., 2011). The  $\gamma$ C<sub>5<sub>EC1-3</sub></sub> crystal structure (PDB: 4ZPO)  
684 modified using a sequence alignment to  $\gamma$ C<sub>4</sub> with Phenix's MRage program (Liebschner et al.,  
685 2019) was used as a search model. Following an initial round of rigid body refinement in Phenix  
686 (Liebschner et al., 2019) the EC domain 4 from the  $\alpha$ 7<sub>EC1-5</sub> crystal structure (PDB: 5DZV) was  
687 manually placed into the electron density map, using structural alignment to the EC1–3 regions as  
688 a guide. The resulting model was subjected to a further round of rigid body refinement. At this  
689 stage there was clear difference density for the interdomain calcium ions and covalently linked  
690 glycans not present in the models. Iterative model building using Coot (Emsley et al., 2010) and  
691 maximum-likelihood refinement using Phenix (Liebschner et al., 2019) was subsequently  
692 conducted. The higher resolution (2.4 Å) crystal form 2 crystal structure (see below) was used as  
693 a reference model in later rounds of iterative model-building and refinement to guide the local  
694 geometry choices in this lower resolution structure. Final refinement statistics are given in Figure  
695 3—source data 1.

696

#### 697 *$\gamma$ C<sub>41-4</sub> crystal form 2: data processing, phasing, and refinement*

698 The  $\gamma$ C<sub>41-4</sub> crystal form 2 dataset was indexed using XDS (Kabsch, 2010) and scaled using  
699 AIMLESS (Evans and Murshudov, 2013). The data was spherically truncated with high resolution  
700 limit of 2.4 Å. Data collection statistics are given in Figure 3—source data 1.

701

702 The  $\gamma$ C<sub>41-4</sub> crystal form 2 crystal structure has two molecules in the asymmetric unit was solved  
703 by molecular replacement using Phaser (McCoy et al., 2007), implemented in Phenix (Liebschner  
704 et al., 2019), using the EC2–3 portion of the *trans*-dimer from the crystal form 1 crystal structure  
705 early in refinement as a search model. The molecular replacement solution was then subjected to  
706 an initial round of rigid body refinement using Phenix, followed by two rounds of model building

707 in Coot (Emsley et al., 2010) and maximum likelihood refinement in Phenix. The two EC4  
708 domains were then manually placed in the electron density and subjected to rigid body refinement.  
709 Following a further two iterative rounds of model building and refinement the two EC1 domains  
710 were manually placed. Iterative model-building and refinement continued yielding the final crystal  
711 structure whose statistics are given in Figure 3—source data 1.

712

### 713 **Structure analysis**

714 Buried surface areas were calculated using 'Protein interfaces, surfaces and assemblies' service  
715 (PISA) at the European Bioinformatics Institute ([http://www.ebi.ac.uk/pdbe/prot\\_int/pistart.html](http://www.ebi.ac.uk/pdbe/prot_int/pistart.html))  
716 (Krissinel and Henrick, 2007) and are given as the change in accessible surface area over both  
717 protomers. Root mean square deviations over aligned C $\alpha$  atoms (RMSDs) between structures were  
718 calculated using Pymol (Schrödinger, LLC). Crystal structure figures were made using Pymol  
719 (Schrödinger, LLC).

720

### 721 **Sequence analysis**

722 Multiple sequence alignments were generated using Clustal Omega (Sievers et al., 2011) and  
723 visualized using ESPript3.0 (Robert and Gouet, 2014). Sequence logos were generated from  
724 multiple sequence alignments using WebLogo3 (Crooks et al., 2004).

725

### 726 ***Amino acid sequence alignment of cPcdhs $\gamma$ B7, $\gamma$ A4, and $\gamma$ C3 EC1–6 regions***

727 CLUSTAL O(1.2.4) multiple sequence alignment

728

|     |             |                                                               |     |
|-----|-------------|---------------------------------------------------------------|-----|
| 729 | $\gamma$ B7 | -QPVRYSIPEELDRGSSVVGKLAIDLGLSVLEVSARKLRVS--AEKLHFSVDSESGDLLVK | 57  |
| 730 | $\gamma$ A4 | -EQIRYSVPEELERGSVVGNAADLGLLEPGKLAERGVRIIVSRGKTQLFALNPRSGSLVTA | 59  |
| 731 | $\gamma$ C3 | STIIHYEILEERERGFVGVNVTDLGLDLGSLSARRLRVVGASRRFFEVNWETGEMFVN    | 60  |
| 732 |             | ::*.: ** :** **::.. ****. .:: * :*: .. * :. :*.:..            |     |
| 733 |             |                                                               |     |
| 734 | $\gamma$ B7 | DRIDREQICKGRKCELQLEAVLENPLNIFHVVEIEDVNDHAPQFPKDEINLEISESDS    | 117 |
| 735 | $\gamma$ A4 | GRVDREGLCDRSPKCTANLEILLEDKVRILAIEVEIIDVNDNAPSFGAQREIKVAESEN   | 119 |
| 736 | $\gamma$ C3 | DRLDREELCGTLPSCVTTLVVENPLELFSAEVVVQDINDNPNPSFPTGEMKLEISEALA   | 120 |
| 737 |             | .*:*** :* .* ** :*: :.: * : :***: *.* : :*:*:*                |     |
| 738 |             |                                                               |     |
| 739 | $\gamma$ B7 | PGARTILESAKDLDIGMNSLSKYQLSPNDYFLLLVDKNDPDGSKYPELELQKMLDREAEST | 177 |
| 740 | $\gamma$ A4 | PGTRFPLPEAFDLDIGVNALQGYQLSSNDHFSLDVQSGPDGIKYPELVLENALDREEEAV  | 179 |
| 741 | $\gamma$ C3 | PGTRFPLESAHDPDVGNSLQTYELSHNEYFALRVQTREDGTYAELVLERALDWEREPS    | 180 |
| 742 |             | **:* * .* * *:* *:* *:* *:* * * : ** ** * * :. ** * *         |     |
| 743 |             |                                                               |     |
| 744 | $\gamma$ B7 | HHLMLTAVDGGDPRTGTTLRLIRVVDANDNRPVFSQDVYRVRLPEDLPPTVLRKAM      | 237 |
| 745 | $\gamma$ A4 | HHLVLTAFDGGDPVRSQTATIQTIVLVDTNDNAPVFTQPEYHISVKENLPVGTLLTIKAT  | 239 |
| 746 | $\gamma$ C3 | VQLVLTALDGGTPARSATLPIRITVLDANDNAPAFNQSLYRARVREDAPPGTRVAQVLAT  | 240 |

|     |             |                                                                |     |
|-----|-------------|----------------------------------------------------------------|-----|
| 747 |             | :*:***.*** * *:. * ::: :*:*** *.*. * *: : * : * ** : : *       |     |
| 748 |             |                                                                |     |
| 749 | $\gamma$ B7 | DQDEGINAEFTYSFLGV-ANK--AQFSLDPITGDIVTRQSLDFEVEQYITIDVEAKDRGS   | 294 |
| 750 | $\gamma$ A4 | DPDEGVNGEVITYSFRNV-REKISQLFQLNSLTGDIITVLGELDYEDSGFYDVDVEAHDGPG | 298 |
| 751 | $\gamma$ C3 | DLDEGLNGEIVYSFGSHNRAGVRELFALDLVLTGVLTIKGRDLDFEDTKLHEIYIQAKDKGA | 300 |
| 752 |             | * ***:*.*.*** . * *: **: . * **: * : : : ** : *                |     |
| 753 |             |                                                                |     |
| 754 | $\gamma$ B7 | --LSSQCKVIEIIVLDENDNRPEIIITSLSDQISEDSPSGTVVALFKVVRDRDSGENAEVMC | 352 |
| 755 | $\gamma$ A4 | --LRARSKVLVTVLDVNDNAPEVTVTSLTSSIQEASSPGTVIALFNVHSDSGENGLVTC    | 356 |
| 756 | $\gamma$ C3 | NPEGAHCKVLVEVVDVNDNAPEITVTSVYSPVPEDAPLGTVIALLSVTDLDAGENGLVTC   | 360 |
| 757 |             | ::.***: *:* *** **: **: . : * : ***:***:.* * *:***. * *        |     |
| 758 |             |                                                                |     |
| 759 | $\gamma$ B7 | SLSGNPFKIHSSNNYYKLVTDSDLREQTPGYNVTITATDRGKPPSSSTTITLNVAD       | 412 |
| 760 | $\gamma$ A4 | SIPDNLFFRLEKTYGNYHRLLIHRTLDRREEVSDYNITITATDQGTPLSTETYISLQVVD   | 416 |
| 761 | $\gamma$ C3 | EVPPGLPFLSLSLKNYFTLKTSAALDRETMPEYNLSITARDSGIPSLSALTTVKVQVSD    | 420 |
| 762 |             | .: . ** : .: *. * **** **:*** * * * **: * :.*** *              |     |
| 763 |             |                                                                |     |
| 764 | $\gamma$ B7 | VNDNAPVFQQQAYLINVAENNPQTSITQVKAWDPDVGSNGLVSYIIASDLEPKALSSF     | 472 |
| 765 | $\gamma$ A4 | INDNPPFTFTHASYSAYIPENNPARGASILSITAQDPDSENAQVIYSLSEDTIQGAPMSSY  | 476 |
| 766 | $\gamma$ C3 | INDNPPQSSQSSYDVYVEENNLPGVPILNLSVWDPDAPPNARLSFFLLEPGAETGLVSRY   | 480 |
| 767 |             | :*** * ::* : *** *. * .*** * . : : : : : * : *                 |     |
| 768 |             |                                                                |     |
| 769 | $\gamma$ B7 | VSVNQDSGVVYAQRAFDEHQIRSFQLTLQARDQGSFALSANVSMRVLVDDRNDNAPRVLY   | 532 |
| 770 | $\gamma$ A4 | VSINSNTGVLYALRSFDYEQFDLKLVTARDSGTPPLSSNVSLSLVLDQNDNTPPEILY     | 536 |
| 771 | $\gamma$ C3 | FTINRDNGVLTTLVPLDYEDQREFQLTAHINDGGTPVLATNISVNVFVTDNRNDNAPQVLY  | 540 |
| 772 |             | ::* :.***: : * **: :.*** * * * **: * * **:***:***              |     |
| 773 |             |                                                                |     |
| 774 | $\gamma$ B7 | PTLEPDGSALFDMVPRAAEPGYLVTKVVAVDADSGHNAWLSYHVLQASDPGLFSLGLRTG   | 592 |
| 775 | $\gamma$ A4 | PTIPTDGSTGVELTFRSADPGYLVTKVVAVDKDSGQNAWLSYRLLKASEPGLFSVGLHTG   | 596 |
| 776 | $\gamma$ C3 | PR---PGQSSVEMLPRGTAAGHVSRVVGWDADAGHNAWLSYLLGAPNQSLFAVGLHTG     | 597 |
| 777 |             | * * .: .: * *: * **:***. * * *:***** :* * : .***:***:***       |     |
| 778 |             |                                                                |     |
| 779 | $\gamma$ B7 | EVRTARALSDKDAARQLLVAVRDGGQPPLSATATLLLVFADSLQE                  | 638 |
| 780 | $\gamma$ A4 | EVRTARALLDRDALKQSLVVTVDHGGQPPLSATVTLTIAVSDNIPD                 | 642 |
| 781 | $\gamma$ C3 | QISTARPIQDTPSRQILTVLISDSGPELLSTTATLTVSVTEESPE                  | 643 |
| 782 |             | :: *** : * *: : * * * : * * : * **:***. * * : .*** : *         |     |
| 783 |             |                                                                |     |

## 784 Structure-based sequence analysis of the $\gamma$ A4/ $\gamma$ C3 interaction

785 Since both  $\gamma$ A4<sub>3-6</sub> and  $\gamma$ C3<sub>3-6</sub> are monomeric in solution but form a robust heterodimer when mixed  
786 (in SPR, AUC, and SEC-MALS) we hypothesized that these molecules might have opposing *cis*  
787 interaction side preferences. To facilitate hypothesis generation on the nature of their *cis*  
788 heterodimer interaction we modeled the two possible  $\gamma$ A4/ $\gamma$ C3 *cis* dimers: one with  $\gamma$ A4 occupying  
789 the EC6-only position and  $\gamma$ C3 the EC5-6 position; and the second with  $\gamma$ C3 in the EC6-only  
790 position and  $\gamma$ A4 in the EC5-6 position. To do this the monomeric  $\gamma$ A4<sub>EC3-6</sub> crystal structure (PDB:  
791 5SZQ) was structurally superimposed over EC6 domains with the EC6-only protomer from the  
792  $\gamma$ B7<sub>EC3-6</sub> *cis*-dimer crystal structure (PDB: 5V5X; RMSD 0.7 Å over 91 aligned C $\alpha$ s) or over EC5-  
793 6 domains with the EC5-6 protomer (RMSD 1.0 Å over 194 aligned C $\alpha$ s). Since  $\gamma$ A4 and  $\gamma$ B7 are

794 so structurally similar in their EC5–6 regions modeling  $\gamma$ A4's *cis* interactions in this manner as a  
795 basis for hypothesis generation seemed reasonable. The only region of significant structural  
796 deviation within the EC5–6 regions between  $\gamma$ A4 and  $\gamma$ B7 is in the EC6 A–A' loop region which  
797 has a peripheral role in the EC6-only protomer interface. For modelling  $\gamma$ C3 we used  
798 computational mutagenesis of the  $\gamma$ B7 structure selecting the best-fit rotamer for each amino acid  
799 from the Dunbrack rotamer library (Shapovalov and Dunbrack, 2011), implemented in UCSF  
800 Chimera (Pettersen et al., 2004). No energy minimization was conducted and the models are  
801 intended only for use in hypothesis generation.

802

### 803 *Cis interface mutants*

804 Our studies of Pcdh *cis* interactions we have found that mutagenesis of the *cis* interface commonly  
805 has a deleterious impact on protein expression levels in our system (Goodman et al., 2017). We  
806 assume this is because *cis* interaction is required for robust cell-surface delivery/secretion (Thu et  
807 al., 2014), although this hasn't been specifically addressed in our HEK293 protein expression  
808 system.

809

810 To test our structure-guided hypotheses regarding  $\gamma$ A4 and  $\gamma$ C3s' *cis* interactions and side  
811 preferences as we tried to make a number of different *cis* interface mutants and were able to obtain  
812 four different mutants (see table below). Since protein yields were generally too low for AUC and  
813 SPR, MALS was used to study the impact of these mutants on  $\gamma$ A4/ $\gamma$ C3 *cis* dimer formation.

814

| <b>Mutant protein<br/>(<math>\gamma</math>B7 numbering given in parentheses)</b> | <b><i>Cis</i> interface side<br/>targeted</b> | <b>Protein expression in<br/>25 mL test</b> |
|----------------------------------------------------------------------------------|-----------------------------------------------|---------------------------------------------|
| $\gamma$ C3 EC3–6 Y540G (Y532G equivalent)                                       | EC6-only                                      | No                                          |
| $\gamma$ C3 EC3–6 V560D (L555D equivalent)                                       | EC6-only                                      | No                                          |
| $\gamma$ C3 EC3–6 V565R (V560R equivalent)                                       | EC6-only                                      | Yes                                         |
| $\gamma$ C3 EC3–6 A575R (A570R equivalent)                                       | EC5–6                                         | No                                          |
| $\gamma$ C3 EC3–6 R563K (K558R equivalent)                                       | Both                                          | Yes                                         |
| $\gamma$ A4 EC3–6 Y536G (Y532G equivalent)                                       | EC6-only                                      | No                                          |
| $\gamma$ A4 EC3–6 L559D (L555D equivalent)                                       | EC6-only                                      | No                                          |
| $\gamma$ A4 EC3–6 V564R (V560R equivalent)                                       | EC6-only                                      | Yes                                         |
| $\gamma$ A4 EC3–6 A574R (A570R equivalent)                                       | EC5–6                                         | No                                          |
| $\gamma$ A4 EC3–6 K562R (K558R equivalent)                                       | EC6-only                                      | Yes                                         |
| $\beta$ 1 EC3–6 V563R (V560R equivalent)                                         | EC6-only                                      | No                                          |
| $\beta$ 1 EC3–6 S573R (A570R equivalent)                                         | EC6-only                                      | No                                          |
| $\beta$ 1 EC3–6 K561R (K558R equivalent)                                         | EC5–6                                         | No                                          |
| $\beta$ 9 EC3–6 V563R (V560R equivalent)                                         | EC6-only                                      | No                                          |
| $\beta$ 9 EC3–6 A573R (A570R equivalent)                                         | EC6-only                                      | No                                          |
| $\beta$ 9 EC3–6 K561R (K558R equivalent)                                         | EC5–6                                         | No                                          |

815

816 **Accession numbers**

817 Atomic coordinates and structure factors for the  $\gamma$ C4 EC1–4 crystal structures are deposited in the  
818 protein data bank with accession codes PDB: 7JGZ and 7RGF.

819 **Author contributions**

820 K.M.G., B.H., and L.S. designed experiments and analyzed data. S.M., F.B., and K.M.G. cloned,  
821 expressed, purified and crystallized the proteins. K.M.G. determined the crystal structures and  
822 conducted the sequence and structural analysis. S.M. and F.B. performed the site-directed  
823 mutagenesis. P.S.K. performed and analyzed the surface plasmon resonance experiments. G.A.  
824 performed and analyzed the analytical ultracentrifugation and multi-angle light scattering  
825 experiments. H.D. and R.S. performed and analyzed the cell aggregation experiments. K.M.G. and  
826 P.S.K. produced the figures. K.M.G. and L.S. drafted the manuscript. K.M.G., P.S.K., R.R., B.H.,  
827 and L.S. edited the manuscript.

828 **Acknowledgements**

829 We thank Surajit Banerjee for help with synchrotron data collection at the APS NE-CAT 24-ID-  
830 C/E beamlines, supported by NIH P41GM103403. This work was supported by the NIH (grants  
831 R01MH114817 to L.S. and R01DK106548 to R.S.), the National Science Foundation (grant MCB-  
832 1412472 to B.H.), the Israel Science Foundation (grant 1463/19 to R.R.) and the Israel Cancer  
833 Research Fund (grant ICRF 19-203-RCDA to R.R.).

834

835 **Competing Interests**

836 The authors declare no competing interests.

837 **Supplementary Files**

838 Figure 2—figure supplements 1–2 and source data 1

839 Figure 3—figure supplement 1 and source data 1–2

840 Figure 4—figure supplements 1–3 and source data 1

841 Figure 5—figure supplements 1–2

## 842 **References**

- 843 Baldi, L., Hacker, D.L., Meerschman, C., and Wurm, F.M. (2012). Large-Scale Transfection of Mammalian  
844 Cells. In *Protein Expression in Mammalian Cells: Methods and Protocols*, J.L. Hartley, ed. (Totowa, NJ:  
845 Humana Press), pp. 13-26.
- 846 Barat, B., and Wu, A.M. (2007). Metabolic biotinylation of recombinant antibody by biotin ligase retained  
847 in the endoplasmic reticulum. *Biomolecular Engineering* 24, 283-291.
- 848 Bonn, S., Seeburg, P.H., and Schwarz, M.K. (2007). Combinatorial Expression of  $\alpha$ - and  $\gamma$ -Protocadherins  
849 Alters Their Presenilin-Dependent Processing. *Molecular and Cellular Biology* 27, 4121-4132.
- 850 Brasch, J., Goodman, K.M., Noble, A.J., Rapp, M., Mannepalli, S., Bahna, F., Dandey, V.P., Bepler, T.,  
851 Berger, B., Maniatis, T., *et al.* (2019). Visualization of clustered protocadherin neuronal self-recognition  
852 complexes. *Nature* 569, 280-283.
- 853 Brasch, J., Katsamba, P.S., Harrison, O.J., Ahlsén, G., Troyanovsky, R.B., Indra, I., Kaczynska, A., Kaeser,  
854 B., Troyanovsky, S., Honig, B., *et al.* (2018). Homophilic and Heterophilic Interactions of Type II  
855 Cadherins Identify Specificity Groups Underlying Cell-Adhesive Behavior. *Cell Reports* 23, 1840-1852.
- 856 Canzio, D., and Maniatis, T. (2019). The generation of a protocadherin cell-surface recognition code for  
857 neural circuit assembly. *Current Opinion in Neurobiology* 59, 213-220.
- 858 Chen, J., Lu, Y., Meng, S., Han, M.-H., Lin, C., and Wang, X. (2009).  $\alpha$ - and  $\gamma$ -Protocadherins Negatively  
859 Regulate PYK2. *Journal of Biological Chemistry* 284, 2880-2890.
- 860 Chen, W.V., Nwakeze, C.L., Denny, C.A., O’Keeffe, S., Rieger, M.A., Mountoufaris, G., Kirner, A.,  
861 Dougherty, J.D., Hen, R., Wu, Q., *et al.* (2017). *Pcdhac2* is required for axonal tiling and assembly of  
862 serotonergic circuitries in mice. *Science* 356, 406-411.
- 863 Cooper, S.R., Jontes, J.D., and Sotomayor, M. (2016). Structural determinants of adhesion by  
864 Protocadherin-19 and implications for its role in epilepsy. *eLife* 5, e18529.
- 865 Cosmanescu, F., Katsamba, P.S., Sergeeva, A.P., Ahlsen, G., Patel, S.D., Brewer, J.J., Tan, L., Xu, S., Xiao,  
866 Q., Nagarkar-Jaiswal, S., *et al.* (2018). Neuron-Subtype-Specific Expression, Interaction Affinities, and  
867 Specificity Determinants of DIP/Dpr Cell Recognition Proteins. *Neuron* 100, 1385-1400.e1386.
- 868 Crooks, G.E., Hon, G., Chandonia, J.-M., and Brenner, S.E. (2004). WebLogo: A Sequence Logo  
869 Generator. *Genome Research* 14, 1188-1190.
- 870 Emsley, P., Lohkamp, B., Scott, W.G., and Cowtan, K. (2010). Features and development of Coot. *Acta*  
871 *Crystallographica Section D: Biological Crystallography* 66, 486-501.



- 872 Esumi, S., Kakazu, N., Taguchi, Y., Hirayama, T., Sasaki, A., Hirabayashi, T., Koide, T., Kitsukawa, T.,  
873 Hamada, S., and Yagi, T. (2005). Monoallelic yet combinatorial expression of variable exons of the  
874 protocadherin-alpha gene cluster in single neurons. *Nature Genetics* 37, 171-176.
- 875 Evans, P.R., and Murshudov, G.N. (2013). How good are my data and what is the resolution? *Acta*  
876 *Crystallographica Section D: Biological Crystallography* 69, 1204-1214.
- 877 Fan, L., Lu, Y., Shen, X., Shao, H., Suo, L., and Wu, Q. (2018). Alpha protocadherins and Pyk2 kinase  
878 regulate cortical neuron migration and cytoskeletal dynamics via Rac1 GTPase and WAVE complex in  
879 mice. *eLife* 7, e35242.
- 880 Fukuda, E., Hamada, S., Hasegawa, S., Katori, S., Sanbo, M., Miyakawa, T., Yamamoto, T., Yamamoto,  
881 H., Hirabayashi, T., and Yagi, T. (2008). Down-regulation of protocadherin- $\alpha$  A isoforms in mice changes  
882 contextual fear conditioning and spatial working memory. *European Journal of Neuroscience* 28, 1362-  
883 1376.
- 884 Garrett, A.M., Bosch, P.J., Steffen, D.M., Fuller, L.C., Marcucci, C.G., Koch, A.A., Bais, P., Weiner, J.A.,  
885 and Burgess, R.W. (2019). CRISPR/Cas9 interrogation of the mouse *Pcdhg* gene cluster reveals a crucial  
886 isoform-specific role for *Pcdhgc4*. *PLOS Genetics* 15, e1008554.
- 887 Goodman, K.M., Rubinstein, R., Dan, H., Bahna, F., Mannepalli, S., Ahlsén, G., Aye Thu, C., Sampogna,  
888 R.V., Maniatis, T., Honig, B., *et al.* (2017). Protocadherin *cis*-dimer architecture and recognition unit  
889 diversity. *Proceedings of the National Academy of Sciences* 114, E9829-E9837.
- 890 Goodman, K.M., Rubinstein, R., Thu, C.A., Bahna, F., Mannepalli, S., Ahlsen, G., Rittenhouse, C.,  
891 Maniatis, T., Honig, B., and Shapiro, L. (2016a). Structural Basis of Diverse Homophilic Recognition by  
892 Clustered alpha- and beta-Protocadherins. *Neuron* 90, 709-723.
- 893 Goodman, K.M., Rubinstein, R., Thu, C.A., Mannepalli, S., Bahna, F., Ahlsén, G., Rittenhouse, C.,  
894 Maniatis, T., Honig, B., and Shapiro, L. (2016b).  $\gamma$ -Protocadherin structural diversity and functional  
895 implications. *eLife* 5, e20930.
- 896 Goodman, K.M., Yamagata, M., Jin, X., Mannepalli, S., Katsamba, P.S., Ahlsén, G., Sergeeva, A.P., Honig,  
897 B., Sanes, J.R., and Shapiro, L. (2016c). Molecular basis of sidekick-mediated cell-cell adhesion and  
898 specificity. *eLife* 5, e19058.
- 899 Harrison, O.J., Brasch, J., Katsamba, P.S., Ahlsen, G., Noble, A.J., Dan, H., Sampogna, R.V., Potter, C.S.,  
900 Carragher, B., Honig, B., *et al.* (2020). Family-wide Structural and Biophysical Analysis of Binding  
901 Interactions among Non-clustered  $\delta$ -Protocadherins. *Cell Reports* 30, 2655-2671.e2657.
- 902 Harrison, O.J., Vendome, J., Brasch, J., Jin, X., Hong, S., Katsamba, P.S., Ahlsen, G., Troyanovsky, R.B.,  
903 Troyanovsky, S.M., Honig, B., *et al.* (2012). Nectin ectodomain structures reveal a canonical adhesive  
904 interface. *Nature Structural & Molecular Biology* 19, 906-915.
- 905 Hasegawa, S., Kumagai, M., Hagihara, M., Nishimaru, H., Hirano, K., Kaneko, R., Okayama, A.,  
906 Hirayama, T., Sanbo, M., and Hirabayashi, M. (2016). Distinct and Cooperative Functions for the

- 907 Protocadherin- $\alpha$ - $\beta$  and- $\gamma$  Clusters in Neuronal Survival and Axon Targeting. *Frontiers in Molecular*  
908 *Neuroscience* 9, 155.
- 909 Hattori, D., Chen, Y., Matthews, B.J., Salwinski, L., Sabatti, C., Grueber, W.B., and Zipursky, S.L. (2009).  
910 Robust discrimination between self and non-self neurites requires thousands of Dscam1 isoforms. *Nature*  
911 461, 644-U687.
- 912 Honig, B., and Shapiro, L. (2020). Adhesion Protein Structure, Molecular Affinities, and Principles of Cell-  
913 Cell Recognition. *Cell* 181, 520-535.
- 914 Hudson, J.D., Tamilselvan, E., Sotomayor, M., and Cooper, S.R. (2021). A complete Protocadherin-19  
915 ectodomain model for evaluating epilepsy-causing mutations and potential protein interaction sites.  
916 *Structure*.
- 917 Ing-Esteves, S., Kostadinov, D., Marocha, J., Sing, A.D., Joseph, K.S., Laboulaye, M.A., Sanes, J.R., and  
918 Lefebvre, J.L. (2018). Combinatorial Effects of Alpha- and Gamma-Protocadherins on Neuronal Survival  
919 and Dendritic Self-Avoidance. *The Journal of Neuroscience* 38, 2713-2729.
- 920 Iqbal, M., Maroofian, R., Çavdarlı, B., Riccardi, F., Field, M., Banka, S., Bubshait, D.K., Li, Y., Hertecant,  
921 J., Baig, S.M., *et al.* (2021). Biallelic variants in PCDHGC4 cause a novel neurodevelopmental syndrome  
922 with progressive microcephaly, seizures, and joint anomalies. *Genetics in Medicine*.
- 923 Kabsch, W. (2010). XDS. *Acta Crystallographica Section D: Biological Crystallography* 66, 125-132.
- 924 Kaneko, R., Kato, H., Kawamura, Y., Esumi, S., Hirayama, T., Hirabayashi, T., and Yagi, T. (2006). Allelic  
925 gene regulation of Pcdh-alpha and Pcdh-gamma clusters involving both monoallelic and biallelic  
926 expression in single Purkinje cells. *Journal of Biological Chemistry* 281, 30551-30560.
- 927 Katsamba, P., Carroll, K., Ahlsen, G., Bahna, F., Vendome, J., Posy, S., Rajebhosale, M., Price, S., Jessell,  
928 T.M., Ben-Shaul, A., *et al.* (2009). Linking molecular affinity and cellular specificity in cadherin-mediated  
929 adhesion. *Proceedings of the National Academy of Sciences* 106, 11594-11599.
- 930 Keeler, A.B., Schreiner, D., and Weiner, J.A. (2015). Protein Kinase C Phosphorylation of a  $\gamma$ -  
931 Protocadherin C-terminal Lipid Binding Domain Regulates Focal Adhesion Kinase Inhibition and Dendrite  
932 Arborization. *Journal of Biological Chemistry* 290, 20674-20686.
- 933 Kostadinov, D., and Sanes, J.R. (2015). Protocadherin-dependent dendritic self-avoidance regulates neural  
934 connectivity and circuit function. *Elife* 4.
- 935 Krissinel, E., and Henrick, K. (2007). Inference of Macromolecular Assemblies from Crystalline State.  
936 *Journal of Molecular Biology* 372, 774-797.
- 937 Lefebvre, J.L., Kostadinov, D., Chen, W.V., Maniatis, T., and Sanes, J.R. (2012). Protocadherins mediate  
938 dendritic self-avoidance in the mammalian nervous system. *Nature* 488, 517-521.

- 939 Liebschner, D., Afonine, P.V., Baker, M.L., Bunkoczi, G., Chen, V.B., Croll, T.I., Hintze, B., Hung, L.-  
940 W., Jain, S., McCoy, A.J., *et al.* (2019). Macromolecular structure determination using X-rays, neutrons  
941 and electrons: recent developments in Phenix. *Acta Crystallographica Section D* 75, 861-877.
- 942 Mah, K.M., Houston, D.W., and Weiner, J.A. (2016). The gamma-Protocadherin-C3 isoform inhibits  
943 canonical Wnt signalling by binding to and stabilizing Axin1 at the membrane. *Scientific Reports* 6.
- 944 Mah, K.M., and Weiner, J.A. (2017). Regulation of Wnt signaling by protocadherins. *Seminars in Cell &*  
945 *Developmental Biology* 69, 158-171.
- 946 McCoy, A.J., Grosse-Kunstleve, R.W., Adams, P.D., Winn, M.D., Storoni, L.C., and Read, R.J. (2007).  
947 Phaser crystallographic software. *Journal of Applied Crystallography* 40, 658-674.
- 948 Miura, S.K., Martins, A., Zhang, K.X., Graveley, B.R., and Zipursky, S.L. (2013). Probabilistic Splicing of  
949 Dscam1 Establishes Identity at the Level of Single Neurons. *Cell* 155, 1166-1177.
- 950 Modak, D., and Sotomayor, M. (2019). Identification of an adhesive interface for the non-clustered  $\delta 1$   
951 protocadherin-1 involved in respiratory diseases. *Communications Biology* 2, 354.
- 952 Molumby, M.J., Anderson, R.M., Newbold, D.J., Koblesky, N.K., Garrett, A.M., Schreiner, D., Radley,  
953 J.J., and Weiner, J.A. (2017).  $\gamma$ -Protocadherins Interact with Neuroligin-1 and Negatively Regulate  
954 Dendritic Spine Morphogenesis. *Cell Reports* 18, 2702-2714.
- 955 Mountoufaris, G., Canzio, D., Nwakeze, C.L., Chen, W.V., and Maniatis, T. (2016). Writing, Reading, and  
956 Translating the Clustered Protocadherin Cell Surface Recognition Code for Neural Circuit Assembly.  
957 *Annual Review of Cell and Developmental Biology* 34, 471-493.
- 958 Mountoufaris, G., Chen, W.V., Hirabayashi, Y., O'Keefe, S., Chevee, M., Nwakeze, C.L., Polleux, F., and  
959 Maniatis, T. (2017). Multicenter Pcdh diversity is required for mouse olfactory neural circuit assembly.  
960 *Science* 356, 411-414.
- 961 Murata, Y., Hamada, S., Morishita, H., Mutoh, T., and Yagi, T. (2004). Interaction with Protocadherin- $\gamma$   
962 Regulates the Cell Surface Expression of Protocadherin- $\alpha$ . *Journal of Biological Chemistry* 279, 49508-  
963 49516.
- 964 Nicoludis, J.M., Green, A.G., Walujkar, S., May, E.J., Sotomayor, M., Marks, D.S., and Gaudet, R. (2019).  
965 Interaction specificity of clustered protocadherins inferred from sequence covariation and structural  
966 analysis. *Proceedings of the National Academy of Sciences* 116, 17825-17830.
- 967 Nicoludis, J.M., Lau, S.-Y., Schaefer, C.P.I., Marks, D.S., Weihofen, W.A., and Gaudet, R. (2015).  
968 Structure and Sequence Analyses of Clustered Protocadherins Reveal Antiparallel Interactions that Mediate  
969 Homophilic Specificity. *Structure* 23, 2087-2098.
- 970 Nicoludis, J.M., Vogt, B.E., Green, A.G., Scharfe, C.P.I., Marks, D.S., and Gaudet, R. (2016). Antiparallel  
971 protocadherin homodimers use distinct affinity- and specificity-mediating regions in cadherin repeats 1-4.  
972 *eLife* 5.

- 973 Onouchi, T., Kishino-Kaneko, Y., Kameshita, I., Ishida, A., and Sueyoshi, N. (2015). Regulation of  
974 Ca<sup>2+</sup>/calmodulin-dependent protein kinase phosphatase (CaMKP/PPM1F) by protocadherin- $\gamma$ C5 (Pcdh-  
975  $\gamma$ C5). *Archives of Biochemistry and Biophysics* 585, 109-120.
- 976 Pancho, A., Aerts, T., Mitsogiannis, M.D., and Seuntjens, E. (2020). Protocadherins at the Crossroad of  
977 Signaling Pathways. *Front Mol Neurosci* 13, 117.
- 978 Peek, S.L., Mah, K.M., and Weiner, J.A. (2017). Regulation of neural circuit formation by protocadherins.  
979 *Cellular and Molecular Life Sciences*.
- 980 Petersen, T.N., Brunak, S., von Heijne, G., and Nielsen, H. (2011). SignalP 4.0: discriminating signal  
981 peptides from transmembrane regions. *Nat Meth* 8, 785-786.
- 982 Pettersen, E.F., Goddard, T.D., Huang, C.C., Couch, G.S., Greenblatt, D.M., Meng, E.C., and Ferrin, T.E.  
983 (2004). UCSF Chimera—A visualization system for exploratory research and analysis. *Journal of*  
984 *Computational Chemistry* 25, 1605-1612.
- 985 Phillips, G.R., LaMassa, N., and Nie, Y.M. (2017). Clustered protocadherin trafficking. *Seminars in Cell*  
986 *& Developmental Biology* 69, 131-139.
- 987 Rich, R.L., and Myszka, D.G. (2007). Survey of the year 2006 commercial optical biosensor literature.  
988 *Journal of Molecular Recognition* 20, 300-366.
- 989 Robert, X., and Gouet, P. (2014). Deciphering key features in protein structures with the new ENDscript  
990 server. *Nucleic Acids Research* 42, W320-W324.
- 991 Rubinstein, R., Goodman, K.M., Maniatis, T., Shapiro, L., and Honig, B. (2017). Structural origins of  
992 clustered protocadherin-mediated neuronal barcoding. *Seminars in Cell & Developmental Biology* 69, 140-  
993 150.
- 994 Rubinstein, R., Thu, C.A., Goodman, K.M., Wolcott, H.N., Bahna, F., Mannepalli, S., Ahlsen, G., Chevee,  
995 M., Halim, A., Clausen, H., *et al.* (2015). Molecular Logic of Neuronal Self-Recognition through  
996 Protocadherin Domain Interactions. *Cell* 163, 629-642.
- 997 Schmucker, D., Clemens, J.C., Shu, H., Worby, C.A., Xiao, J., Muda, M., Dixon, J.E., and Zipursky, S.L.  
998 (2000). *Drosophila* Dscam is an axon guidance receptor exhibiting extraordinary molecular diversity. *Cell*  
999 101, 671-684.
- 1000 Schreiner, D., and Weiner, J.A. (2010). Combinatorial homophilic interaction between gamma-  
1001 protocadherin multimers greatly expands the molecular diversity of cell adhesion. *Proceedings of the*  
1002 *National Academy of Sciences of the United States of America* 107, 14893-14898.
- 1003 Sergeeva, A.P., Katsamba, P.S., Cosmanescu, F., Brewer, J.J., Ahlsen, G., Mannepalli, S., Shapiro, L., and  
1004 Honig, B. (2020). DIP/Dpr interactions and the evolutionary design of specificity in protein families. *Nat*  
1005 *Commun* 11, 2125.

- 1006 Shapovalov, M.V., and Dunbrack, R.L., Jr. (2011). A smoothed backbone-dependent rotamer library for  
1007 proteins derived from adaptive kernel density estimates and regressions. *Structure* *19*, 844-858.
- 1008 Sievers, F., Wilm, A., Dineen, D., Gibson, T.J., Karplus, K., Li, W., Lopez, R., McWilliam, H., Remmert,  
1009 M., Söding, J., *et al.* (2011). Fast, scalable generation of high-quality protein multiple sequence alignments  
1010 using Clustal Omega. *Molecular Systems Biology* *7*, 539-539.
- 1011 Steffen, D.M., Ferri, S.L., Marcucci, C.G., Blocklinger, K.L., Molumby, M.J., Abel, T., and Weiner, J.A.  
1012 (2021). The  $\gamma$ -Protocadherins Interact Physically and Functionally with Neuroligin-2 to Negatively  
1013 Regulate Inhibitory Synapse Density and Are Required for Normal Social Interaction. *Molecular*  
1014 *Neurobiology* *58*, 2574-2589.
- 1015 Strong, M., Sawaya, M.R., Wang, S., Phillips, M., Cascio, D., and Eisenberg, D. (2006). Toward the  
1016 structural genomics of complexes: Crystal structure of a PE/PPE protein complex from *Mycobacterium*  
1017 *tuberculosis*. *Proceedings of the National Academy of Sciences of the United States of America* *103*, 8060-  
1018 8065.
- 1019 Thu, C.A., Chen, W.V., Rubinstein, R., Chevee, M., Wolcott, H.N., Felsovalyi, K.O., Tapia, J.C., Shapiro,  
1020 L., Honig, B., and Maniatis, T. (2014). Single-Cell Identity Generated by Combinatorial Homophilic  
1021 Interactions between alpha, beta, and gamma Protocadherins. *Cell* *158*, 1045-1059.
- 1022 Vendome, J., Felsovalyi, K., Song, H., Yang, Z., Jin, X., Brasch, J., Harrison, O.J., Ahlsen, G., Bahna, F.,  
1023 Kaczynska, A., *et al.* (2014). Structural and energetic determinants of adhesive binding specificity in type  
1024 I cadherins. *Proceedings of the National Academy of Sciences of the United States of America* *111*, E4175-  
1025 E4184.
- 1026 Winn, M.D., Ballard, C.C., Cowtan, K.D., Dodson, E.J., Emsley, P., Evans, P.R., Keegan, R.M., Krissinel,  
1027 E.B., Leslie, A.G.W., McCoy, A., *et al.* (2011). Overview of the CCP4 suite and current developments.  
1028 *Acta Crystallographica Section D* *67*, 235-242.
- 1029 Wojtowicz, W.M., Flanagan, J.J., Millard, S.S., and Zipursky, S.L. (2004). Alternative splicing of  
1030 *Drosophila* Dscam generates axon guidance receptors that exhibit isoform-specific homophilic binding.  
1031 *Cell* *118*, 619-633.
- 1032 Wojtowicz, W.M., Wu, W., Andre, I., Qian, B., Baker, D., and Zipursky, S.L. (2007). A vast repertoire of  
1033 Dscam binding Specificities arises from modular interactions of variable ig domains. *Cell* *130*, 1134-1145.
- 1034 Wu, Q., and Maniatis, T. (1999). A striking organization of a large family of human neural cadherin-like  
1035 cell adhesion genes. *Cell* *97*, 779-790.
- 1036 Wu, Q., Zhang, T., Cheng, J.F., Kim, Y., Grimwood, J., Schmutz, J., Dickson, M., Noonan, J.P., Zhang,  
1037 M.Q., Myers, R.M., *et al.* (2001). Comparative DNA sequence analysis of mouse and human protocadherin  
1038 gene clusters. *Genome Research* *11*, 389-404.
- 1039 Wu, W., Ahlsen, G., Baker, D., Shapiro, L., and Zipursky, S.L. (2012). Complementary Chimeric Isoforms  
1040 Reveal Dscam1 Binding Specificity In Vivo. *Neuron* *74*, 261-268.

1041 Wu, Y., Honig, B., and Ben-Shaul, A. (2013). Theory and Simulations of Adhesion Receptor Dimerization  
1042 on Membrane Surfaces. *Biophysical Journal* *104*, 1221-1229.

1043 Zipursky, S.L., and Grueber, W.B. (2013). The Molecular Basis of Self-Avoidance. In *Annual Review of*  
1044 *Neuroscience*, Vol 36, S.E. Hyman, ed., pp. 547-568.

1045

1046

1047 **Figure legends:**

1048

1049 **Figure 1: cPcdh domain organization and extracellular interactions**

1050 **(A)** Schematic depicting the domain organization of cPcdhs. EC, extracellular cadherin domain;  
1051 TM, transmembrane domain; ECD, ectodomain; ICD, intracellular domain.

1052 **(B)** Schematic of two cPcdhs interacting via the EC1–4 *trans* interface.

1053 **(C)** Schematic of two cPcdhs interacting via the EC5–6/EC6 *cis* interface.

1054 **(D)** Schematic depiction of the *cis/trans* cPcdh zipper comprising multiple cPcdh isoforms  
1055 (various colors) engaged in homophilic *trans* interactions and promiscuous *cis* interactions as  
1056 required for the proposed “isoform-mismatch chain-termination model” of cPcdh-mediated  
1057 neuronal self-recognition and self-avoidance.

1058

1059 **Figure 2: cPcdhs show strict homophilic specificity in their *trans* interactions**

1060 **(A)** SPR binding profiles of cPcdh *trans* fragment analytes from all cPcdh subfamilies (denoted in  
1061 the top row) flowed over six surfaces coated with alternate cPcdh *trans* fragments (rows).  
1062 Responses over all surfaces are drawn on the same scale and normalized for molecular weight.

1063 **(B)** SPR binding profiles of cPcdh *trans* fragment analytes from all cPcdh subfamilies (shown in  
1064 columns) flowed over individual surfaces coated with C-type and  $\alpha 4$  cPcdh *trans* fragments  
1065 (rows). Responses over all surfaces are drawn on the same scale and normalized for molecular  
1066 weight.

1067

1068 **Figure 3: C-type cPcdh  $\gamma C4$  adopts an EC1–4-mediated head-to-tail *trans* dimer like  
1069 alternate cPcdhs with a comparatively weak dimer affinity**

1070 **(A)** Ribbon diagrams of the  $\gamma C4_{EC1-4}$  *trans* dimer crystal structures obtained from two different  
1071 crystal forms. Bound calcium ions are shown as green spheres and glycans are shown in pale blue  
1072 spheres.

1073 **(B)** The two crystal structures have a markedly different *trans* interface buried surface area (BSA).  
1074 *Left*, Surface views of the two *trans* dimer crystal structures highlight the difference, with a gap  
1075 apparent in the EC2:EC3 region of the interface in crystal form 2 that is absent from crystal form  
1076 1. Surfaces are colored by atom type with the carbons colored orange for crystal form 1 and yellow  
1077 for crystal form 2. *Right*, Close up view of the gap region in the crystal form 2 dimer with the side

1078 chains depicted as sticks. The intact crystal form 1  $\gamma$ C4 dimer is similar overall to those of the  
1079 published intact alternate  $\alpha$ ,  $\beta$ ,  $\gamma$ A, and  $\gamma$ B cPcdhs and the published  $\delta$ 2 non-clustered (nc) Pcdh  
1080 *trans* dimers (root mean square deviation over aligned C $\alpha$ s (RMSD) 2.4–4.5 Å; Figure 3—source  
1081 data 2). The published crystal structures of  $\gamma$ A8,  $\gamma$ A1, and  $\gamma$ B3 also show partially disrupted *trans*  
1082 interfaces though in differing regions of the interface (Goodman et al., 2016b, Nicoludis et al.,  
1083 2016).

1084 (C) Comparison between the (i) EC1:EC4 and (ii) EC2:EC3 regions of the  $\gamma$ C4 (orange) and  $\gamma$ B2  
1085 (blue, PDB 5T9T) *trans* dimer interfaces. (i) Structural alignment of the EC1:EC4 portion of the  
1086  $\gamma$ C4 and  $\gamma$ B2 *trans* dimers highlights a possible destabilizing role for  $\gamma$ C4 residue E78 since unlike  
1087 its counterpart in  $\gamma$ B2 (D77) it is not juxtaposed with a basic residue. (ii) Similarly, an additional  
1088 negatively charged residue (D290) which occupies a central position in the  $\gamma$ C4 EC2:EC3 interface  
1089 may also contribute to  $\gamma$ C4's comparatively weak *trans* dimer interaction. Distances between the  
1090 D290 side chain and its nearest contacts are shown as dashed grey lines with distances given in  
1091 Angstroms.

1092 (D) Sedimentation equilibrium AUC experiments were conducted on  $\gamma$ C4 EC1–4 wild type (wt)  
1093 and interface mutants to assess whether E78 and D290 negatively impact *trans* dimerization. Table  
1094 details the oligomeric state and dissociation constants for each protein tested.

1095

1096 **Figure 4: cPcdh *cis* interactions are promiscuous with a preference for interfamily**  
1097 **heterodimers**

1098 (A) SPR binding profiles of cPcdh *cis* fragment analytes from all cPcdh subfamilies except alphas  
1099 (shown in columns) flowed over individual surfaces coated with cPcdh *cis* fragments. Binding  
1100 profiles for each surface are individually scaled and responses are normalized for molecular  
1101 weight.

1102 (B) Table of dissociation constants calculated from the SPR data for the four monomeric analytes.  
1103 The number in brackets represents the error of the fit based on analysis of duplicate responses.  
1104 Binding signals were not detected for interactions labeled NB (no binding) while >50, represents  
1105 interactions with  $K_D$ s >50  $\mu$ M, where an accurate  $K_D$  cannot be determined.

1106

1107



1108 **Figure 5:  $\gamma$ A4 preferentially forms the EC6-only side and  $\gamma$ C3 the EC5–6 side in *cis* dimers**

1109 (A) Structural model of  $\gamma$ A4/ $\gamma$ C3 *cis* dimer based on  $\gamma$ B7<sub>EC3–6</sub> *cis* dimer and  $\gamma$ A4<sub>EC3–6</sub> crystal  
1110 structures (PDBs: 5V5X and 5SZQ).  $\gamma$ A4 is shown adopting the EC6-only side (blue protomer)  
1111 and  $\gamma$ C3 is shown adopting the EC5–6 side (yellow protomer). Left, schematic of the  $\gamma$ A4/ $\gamma$ C3  
1112 EC3–6 *cis* dimer. Right, close-up view of the EC6:EC6 interface from the modeled *cis* dimer  
1113 showing interfacial residue side chains. Bound calcium ions are shown as green spheres. Residues  
1114 which were mutated in the panel B are circled in red.  $\gamma$ B7 crystal structure numbering is used for  
1115 both  $\gamma$ A4 and  $\gamma$ C3 residues. See methods for  $\gamma$ A4 and  $\gamma$ C3 alignment. Please note the model shown  
1116 here is solely for hypothesis generation, since it is unlikely to be completely accurate. See methods  
1117 for further details of structural modeling.

1118 (B) *Top*, SEC-MALS data for an equimolar mixture of wild-type  $\gamma$ A4<sub>EC3–6</sub> and  $\gamma$ C3<sub>EC3–6</sub> showing  
1119 dimer formation. Plot shows size exclusion absorbance at 280 nm trace (left axis), molecular  
1120 weight of the eluant peaks (right axis), and the monomer molecular weights of  $\gamma$ A4<sub>EC3–6</sub> and  
1121  $\gamma$ C3<sub>EC3–6</sub> measured by mass spectrometry – 54.5 kDa and 56.5 kDa respectively – as dashed grey  
1122 lines. Average molecular weight of the molecules in the dimer and monomer eluant peaks are  
1123 labeled. *Middle*, SEC-MALS data for V560R mutants, which target the EC6-only side of the  
1124 interface. *Bottom*, SEC-MALS data for residue 558 mutants. The  $\gamma$ C3-like K558R mutation in  $\gamma$ A4  
1125 inhibits heterodimer formation with wild-type  $\gamma$ C3. Similarly, the  $\gamma$ A4-like R558K in  $\gamma$ C3 inhibits  
1126 dimerization with wild-type  $\gamma$ A4.

1127 (C) SPR binding profiles for  $\gamma$ B7<sub>EC3–6</sub> wild type and *cis* interface mutants flowed over three  
1128 individual wild-type *cis* fragment surfaces. The two mutations specifically target one side of the  
1129 *cis* interface.

1130

1131 **Figure 2—figure supplement 1: *Trans* interface mutants demonstrate homophilic**  
1132 **interactions observed in SPR are mediated by the *trans* dimer interface**

1133 **(A)** SPR binding curves for wild-type and *trans* mutant alternate cPcdhs flowed over their  
1134 respective immobilized wild-type molecule.

1135 **(B)** SPR binding curves for wild-type and *trans* mutant C-type cPcdh  $\gamma$ C5 flowed over  
1136 immobilized wild-type  $\gamma$ C5.

1137

1138 **Figure 2 —figure supplement 2: Mutagenesis experiments reveal role in *trans* specificity for**  
1139 **the five interfacial residue differences between close pair  $\beta$ <sub>6<sub>1-4</sub></sub> and  $\beta$ <sub>8<sub>1-4</sub></sub>**

1140 **A.** Structural superposition of the  $\beta$ <sub>6<sub>1-4</sub></sub> and  $\beta$ <sub>8<sub>1-4</sub></sub> *trans* dimer crystal structures (PDBs: 5DZX and  
1141 5DZY) shown in ribbon depiction above, with close-up views of the *trans* interfacial regions  
1142 containing the five interfacial residues that vary between  $\beta$ <sub>6<sub>1-4</sub></sub> and  $\beta$ <sub>8<sub>1-4</sub></sub> shown below. The two  
1143 protomers forming the  $\beta$ <sub>6<sub>1-4</sub></sub> dimer are colored green and pale green respectively. The  $\beta$ <sub>8<sub>1-4</sub></sub> dimer  
1144 is colored magenta/light pink. Bound calcium ions are shown as green spheres. Interfacial residue  
1145 side chains are shown in the close-up views. The five variable residues are labelled with the  $\beta$ <sub>6<sub>1-4</sub></sub>  
1146 amino acid given in green and the  $\beta$ <sub>8<sub>1-4</sub></sub> amino acid in magenta: R/N41 is in EC1; E/K369 and  
1147 Y/F371 are in EC4; S/I117 is in EC2 and self-interacts at the *trans* dimer center of symmetry; and  
1148 L/P125 is also in EC2.

1149 **B.** SPR binding profiles of b6 *trans* interface mutants converting  $\beta$ <sub>6<sub>1-4</sub></sub> to  $\beta$ <sub>8<sub>1-4</sub></sub> and the wild-type  
1150 molecules (shown in columns) were flowed over surfaces coated with wild-type  $\beta$ <sub>6<sub>1-4</sub></sub> or wild-type  
1151  $\beta$ <sub>8<sub>1-4</sub></sub> (rows).

1152 **C.** Results of the K562 co-aggregation assay where cells transfected with mCherry labeled  $\beta$ 6 and  
1153  $\beta$ 8 wild-types (WT) and the same *trans*-specificity mutants as in **(B)** were each mixed with cells  
1154 transfected with mVenus labeled  $\beta$ 6 and  $\beta$ 8 wild-types (WT). Experiments where the red and green  
1155 cells co-aggregate demonstrating interaction between the mCherry-labeled WT or mutant cPcdh  
1156 and the mVenus-labeled WT cPcdh are labeled “mixed” and highlighted with magenta boxes. Scale  
1157 bar, 100  $\mu$ M.

1158

1159

1160 **Figure 3—figure supplement 1:  $\gamma$ C4 *trans* dimer crystal structures and *trans* interface**  
1161 **analysis**

1162 (A) Our crystallization experiments with  $\gamma$ C4<sub>EC1-4</sub> yielded two distinct crystal forms the first of  
1163 which showed significant X-ray diffraction anisotropy. (i) UCLA Diffraction Anisotropy Server  
1164 (Strong et al., 2006) plot shows the F/sigma by resolution along the a\*, b\* and c\* axes. (ii)  
1165 Synthetic precession photographs of the X-ray diffraction in the k=0 plane (left) and the h=0 plane  
1166 (right) showing the comparatively stronger/weaker diffraction.

1167 (B) Close up views of the EC1:EC4 and EC2:EC3 interfacial regions from the first crystal form.  
1168 One protomer in the symmetric dimer is colored yellow the other orange. Interfacial residues are  
1169 labeled, side chains are shown in stick representation and dashed black lines depict potential  
1170 interfacial hydrogen bond interactions. The two charged residues, E78 and D290, we selected for  
1171 mutagenesis experiments to see whether they play a destabilizing role in the  $\gamma$ C4 *trans* interaction  
1172 are marked with red dashed boxes.

1173 (C) Representative plot of AUC data for the wild type (wt) and mutant  $\gamma$ C4 EC1-4 molecules. Raw  
1174 data are shown in black circles, and the non-linear fits to a monomer-to-dimer model are shown as  
1175 blue lines. The residuals between the data and fits are shown in the plot below. Table detailing the  
1176 oligomeric state and dissociation constants determined from the AUC data is shown in Figure 3.

1177

1178 **Figure 4—figure supplement 1: Calculation of *cis* interaction dissociation constants and the**  
1179 **impact of an  $\alpha$ -Pcdh EC5 on family-wide *cis* interactions**

1180 (A) Kinetic binding analysis of  $\gamma$ C3<sub>3-6</sub> analyte binding over a  $\beta$ 9<sub>3-6</sub> covered surface. Data is shown  
1181 in black, and the red traces represent the fit to an 1:1 binding model.

1182 (B) *Left*, SPR binding profiles from Figure 4 for the four monomeric *cis* fragment analytes over  
1183 all six *cis* fragment surfaces. *Right*, fit of the binding data for these four analytes to 1:1 binding  
1184 isotherms to calculate  $K_{D,s}$ .  $\gamma$ A4<sub>3-6</sub> and  $\gamma$ A9<sub>3-6</sub> are monomeric and they are not included in the  
1185 binding isotherms over their respective surface.

1186 (C) SPR binding profiles for  $\gamma$ C3<sub>3-6</sub> (from Figure 4) and an  $\alpha$ 7<sub>1-5</sub>/ $\gamma$ C3<sub>6</sub> chimera flowed over the  
1187 immobilized *cis* fragment surfaces. Binding profiles for each surface are individually scaled as in  
1188 Figure 4.

1189

1190 **Figure 4—figure supplement 2: Range of cPcdh *cis* and *trans* Dissociation constants,  $K_D$ s**

1191 Chart shows the cPcdh *trans* dimer, homophilic *cis* dimer, and heterophilic *cis* dimer interactions  
1192 for which we have determined binding affinities divided into four subgroups based on their  
1193 dissociation constant. The *trans* and homophilic *cis* dimer affinities were determined using AUC  
1194 (Figure 2—source data 1 and Figure 4—source data 1) and the heterophilic *cis* dimer affinities  
1195 were determined using SPR (Figure 4B). Of the interactions in the >50 mM group one *trans*  
1196 interaction and four homophilic *cis* interactions are monomeric in solution ( $> 500$  mM  $K_D$  in  
1197 AUC). Three of the 11 heterophilic *cis* interactions in the >50 mM group show no binding in our  
1198 SPR experiments based on a 40 RU binding threshold.

1199

1200 **Figure 4—figure supplement 3: Amino acid sequence alignment reveals conservation of *cis***  
1201 **interfacial residues within the alternate cPcdh subfamilies**

1202 **(A)** Amino acid sequence alignments of *cis* interfacial residues from the EC6-only and EC5–6  
1203 surfaces for all 58 mouse cPcdhs subdivided by subfamily. Completely conserved residues are  
1204 highlighted in red with white lettering. Residues 540 and 541 are included in the EC6-only  
1205 alignments since the crystal structure of  $\gamma$ A4 EC3–6 (PDB: 5SZQ) revealed a distinct EC6 A-  
1206 A'loop architecture to that observed in the  $\gamma$ B2, 4, and 7 (PDBs: 5SZR, 6E6B, and 5V5X) *cis*  
1207 fragment crystal structures that would place these residues in the EC6-only interface if maintained  
1208 in *cis* interactions.

1209 **(B)** Sequence logos based on the sequence alignment shown in **(A)** for the EC6-only *cis* interfacial  
1210 residues from each of the five cPcdh subfamilies highlighting the similarities and conserved  
1211 differences between the subfamilies. Residues 540 and 541 are included for all isoforms but greyed  
1212 out for the non-gA isoforms since their involvement may be gA-specific. NB: Previous studies  
1213 have shown that a-Pcdhs have an impaired EC6-only interface (Thu et al., 2014; Goodman et al.,  
1214 2017).

1215 **(C)** Sequence logos for the EC5–6 *cis* interfacial residues from each of the five cPcdh subfamilies.

1216

1217

1218

1219

1220

1221 **Figure 5—figure supplement 1: Structure-guided sequence analysis of  $\gamma$ A4 and  $\gamma$ C3 *cis***  
1222 **interactions**

1223 (A) (i) Schematic of the asymmetric  $\gamma$ B7<sub>EC3-6</sub> *cis* dimer crystal structure. (ii) Close-up view of the  
1224  $\gamma$ B7 *cis* interface: Interfacial residue side chains are shown in pink for the EC6-only protomer and  
1225 purple for the EC5-6 protomer. Bound calcium ions are shown as green spheres.

1226 (B) (i) Schematic of the  $\gamma$ A4<sub>EC6</sub>/ $\gamma$ C3<sub>EC5-6</sub> *cis* dimer. (ii) Model of the  $\gamma$ A4<sub>EC6</sub>/ $\gamma$ C3<sub>EC5-6</sub> *cis* dimer  
1227 interaction generated using structural alignment of EC6 from the monomeric  $\gamma$ A4 EC3-6 crystal  
1228 structure (PDB 5SZQ) to the  $\gamma$ B7 EC3-6 *cis* dimer structure for the EC6-only side and  
1229 computational mutagenesis of  $\gamma$ B7 to  $\gamma$ C3 selecting the best-fit rotamer (without energy  
1230 minimization) for the EC5-6 side. The model suggests that this will be the preferred orientation  
1231 for the  $\gamma$ A4/ $\gamma$ C3 *cis* dimer interaction. Favorable residue differences between  $\gamma$ B7 from (A) and  
1232  $\gamma$ A4/ $\gamma$ C3 in this orientation are noted in green. Please note the model shown here is only used for  
1233 hypothesis generation, since it is unlikely to be completely accurate.

1234 (C) (i) Schematic of the  $\gamma$ C3<sub>EC6</sub>/ $\gamma$ A4<sub>EC5-6</sub> *cis* dimer. (ii) Model of the  $\gamma$ C3<sub>EC6</sub>/ $\gamma$ A4<sub>EC5-6</sub> *cis* dimer  
1235 generated using computational mutagenesis of  $\gamma$ B7 to  $\gamma$ C3 selecting the best-fit rotamer (without  
1236 energy minimization) for the EC6-only side and structural alignment of EC5-6 from the  $\gamma$ A4 EC3-  
1237 6 crystal structure to the  $\gamma$ B7 EC3-6 *cis* dimer structure for the EC5-6 side. The model suggests  
1238 that this orientation for the  $\gamma$ A4/ $\gamma$ C3 *cis* dimer interaction will be disfavored. Unfavorable residue  
1239 differences between  $\gamma$ B7 and  $\gamma$ A4/ $\gamma$ C3 in this orientation are noted in red. Please note the model  
1240 shown here is unlikely to be completely accurate and is simply for hypothesis generation.

1241  
1242 **Figure 5—figure supplement 2:  $\gamma$ A4 and  $\gamma$ C3 *cis*-fragments behave as monomers in SEC-**  
1243 **MALS and mutating  $\gamma$ A4 to make it more like  $\gamma$ C3 prevents  $\gamma$ A4/ $\gamma$ C3 *cis*-heterodimerization**

1244 (A) SEC-MALS data for wild-type  $\gamma$ A4<sub>3-6</sub>, wild-type  $\gamma$ C3<sub>3-6</sub>, and  $\gamma$ C3<sub>3-6</sub> V560R showing all three  
1245 molecules are monomeric in SEC-MALS, consistent with their behavior in sedimentation  
1246 equilibrium AUC. Plots show size exclusion absorbance at 280 nm trace in blue (left axis),  
1247 molecular weight of the eluant peak in black (right axis), and the monomer molecular weight of  
1248  $\gamma$ A4<sub>3-6</sub> or  $\gamma$ C3<sub>3-6</sub> measured by mass spectrometry – 54.5 kDa and 56.5 kDa respectively – as dashed  
1249 grey lines. Average molecular weight of the molecules in the eluant peaks are labeled.

1250 **(B)** SPR binding profiles for  $\gamma A_{3-6}$  wild type and  $\gamma A_{3-6}$  with  $\gamma C3$ -like *cis* interface mutation  
1251 K558R flowed over immobilized wild-type  $\gamma C3_{3-6}$ . Loss of  $\gamma C3_{3-6}$  interaction in the presence of  
1252 the K558R mutation is consistent with the SEC-MALS results shown in Figure 5.  
1253  
1254

| Protein                                      | Oligomeric State          | Dissociation Constant, $K_D$ ( $\mu\text{M}$ ) |
|----------------------------------------------|---------------------------|------------------------------------------------|
| <b><i>Trans-interacting fragments</i></b>    |                           |                                                |
| $\alpha 4_{1-5}$                             | Dimer                     | $5.0 \pm 0.80$                                 |
| $\alpha 7^*_{1-5}$                           | Dimer                     | $2.91 \pm 0.55$                                |
| $\alpha 12_{1-5}$                            | Dimer                     | $34 \pm 2.8$                                   |
| $\beta 6^*_{1-4}$                            | Dimer                     | $16.3 \pm 2.1$                                 |
| $\beta 8^*_{1-4}$                            | Dimer                     | $24.0 \pm 0.43$                                |
| $\gamma A1^*_{1-4}$                          | Dimer                     | $13.3 \pm 0.93$                                |
| $\gamma A4^*_{1-4}$                          | Dimer                     | $45.3 \pm 1.52$                                |
| $\gamma A8^*_{1-4}$                          | Dimer                     | $30 \pm 1.5$                                   |
| $\gamma A9^*_{1-5}$                          | Dimer                     | $8.61 \pm 0.35$                                |
| $\gamma B2^*_{1-5}$                          | Dimer                     | $21.8 \pm 0.21$                                |
| $\gamma B4_{1-5}$                            | Dimer                     | $38 \pm 0.33$                                  |
| $\gamma B5^*_{1-4}$                          | Dimer                     | $79.1 \pm 4.3$                                 |
| $\gamma B5_{1-4}$ -AVI                       | Dimer                     | $50 \pm 0.4$                                   |
| $\alpha C2^*_{1-4}$                          | Dimer                     | $20.6 \pm 1.19$                                |
| $\gamma C3^*_{1-4}$                          | Dimer                     | $115 \pm 1.49$ ( $K_i/K_D = 1.57$ )            |
| $\gamma C4_{1-4}$                            | Monomer / Very weak dimer | $> 500^\dagger$                                |
| $\gamma C5^*_{1-5}$                          | Dimer                     | $100 \pm 4.33$                                 |
| <b><i>Trans mutants</i></b>                  |                           |                                                |
| $\alpha 7_{1-5}$ L301R                       | Weakly dimeric            | $490 \pm 57$                                   |
| $\gamma A8_{1-4}$ I116R*                     | Monomer                   | N/A                                            |
| $\alpha C2^*_{1-3}$                          | Dimer                     | $242 \pm 0.1$ ( $K_i/K_D = 1.48$ )             |
| $\beta 1_{1-4}$ R41N                         | Dimer                     | $160 \pm 0.38$                                 |
| $\beta 1_{1-4}$ S117I                        | Dimer                     | $72 \pm 34$                                    |
| $\beta 1_{1-4}$ L125P                        | Dimer                     | $150 \pm 20$                                   |
| $\beta 1_{1-4}$ E369K                        | Dimer                     | $23 \pm 2.8$                                   |
| $\beta 1_{1-4}$ Y371F                        | Dimer                     | $39 \pm 5.6$                                   |
| $\beta 1_{1-4}$ R41N/S117I                   | Precipitate               | N/A                                            |
| $\beta 1_{1-4}$ R41N/E369K                   | Dimer                     | $41 \pm 0.69$                                  |
| $\beta 1_{1-4}$ S117I/L125P                  | Dimer                     | $68 \pm 5.1$                                   |
| $\beta 1_{1-4}$ R41N/S117I/L125P             | Weak dimer                | $350 \pm 11$                                   |
| $\beta 1_{1-4}$ R41N/S117I/E369K             | Dimer                     | $32 \pm 0.95$                                  |
| $\beta 1_{1-4}$ R41N/S117I/Y371F             | Dimer                     | $18 \pm 0.11$                                  |
| $\beta 1_{1-4}$ R41N/S117I/L125P/E369K/Y371F | Dimer                     | $63 \pm 11$                                    |

**Figure 2—source data 1. Sedimentation equilibrium analytical ultracentrifugation data for *trans* SPR reagents**

\* Previously published data (Rubinstein et al., 2015; Goodman et al., 2016a; Goodman et al., 2016b)

† Dissociation constants larger than 500  $\mu\text{M}$  cannot be accurately determined.

|                                                      | cPcdh $\gamma$ C4 <sub>EC1-4</sub><br>crystal form 1 | cPcdh $\gamma$ C4 <sub>EC1-4</sub><br>crystal form 2 |
|------------------------------------------------------|------------------------------------------------------|------------------------------------------------------|
| <b>Data collection</b>                               |                                                      |                                                      |
| Date                                                 | 02/07/2017                                           | 03/04/2017                                           |
| Beamline                                             | APS 24-ID-E                                          | APS 24-ID-E                                          |
| Wavelength (Å)                                       | 0.97918                                              | 0.97918                                              |
| Space group                                          | I2 <sub>1</sub> 2 <sub>1</sub>                       | P2 <sub>1</sub> 2 <sub>1</sub>                       |
| <i>Cell dimensions</i>                               |                                                      |                                                      |
| a, b, c (Å)                                          | 75.220, 115.680, 194.480                             | 51.944, 103.948, 200.592                             |
| $\alpha$ , $\beta$ , $\gamma$ (°)                    | 90, 90, 90                                           | 90, 90, 90                                           |
|                                                      | <u>Spherical resolution limits</u>                   | <u>Ellipsoidal resolution limits</u>                 |
| Resolution (Å)                                       | 40.00–3.50 (3.83–3.50)                               | 40–4.6/3.9/3.5 (3.84–3.51)                           |
| No. of reflections                                   | 79877 (19206)                                        | 53652 (2402)                                         |
| Unique reflections                                   | 11071 (2608)                                         | 7545 (340)                                           |
| R <sub>merge</sub>                                   | 0.381 (3.459)                                        | 0.215 (0.830)                                        |
| R <sub>meas</sub>                                    | 0.411 (3.722)                                        | 0.232 (0.896)                                        |
| R <sub>pim</sub>                                     | 0.152 (1.366)                                        | 0.086 (0.335)                                        |
| CC(1/2)                                              | 0.995 (0.533)                                        | 0.997 (0.829)                                        |
| I/ $\sigma$                                          | 5.7 (0.8)                                            | 8.3 (2.9)                                            |
| Spherical completeness (%)                           | 99.9 (100.0)                                         | 67.6 (12.5)                                          |
| Ellipsoidal completeness (%)                         | N/A                                                  | 96.8                                                 |
| Redundancy                                           | 7.2 (7.4)                                            | 7.1 (7.1)                                            |
| <b>Refinement</b>                                    |                                                      |                                                      |
| Resolution (Å)                                       | 40–4.6/3.9/3.5                                       | 40.00–2.40                                           |
| Unique reflections                                   | 7545                                                 | 42815                                                |
| Completeness in diffracting sphere or ellipsoid* (%) | 96.8*                                                | 98.5                                                 |
| R <sub>work</sub> / R <sub>free</sub> (%)            | 22.3 / 27.1                                          | 19.6 / 24.1                                          |
| Molecules in A.S.U.                                  | 1                                                    | 2                                                    |
| <i>Number of atoms</i>                               |                                                      |                                                      |
| Protein                                              | 3242                                                 | 6736                                                 |
| Ligand/Ion                                           | 122                                                  | 284                                                  |
| Water                                                | 0                                                    | 125                                                  |
| <i>B-factors</i>                                     |                                                      |                                                      |
| Protein                                              | 101.24                                               | 73.39                                                |
| Ligand/Ion                                           | 101.03                                               | 72.99                                                |
| Water                                                | 106.73                                               | 88.54                                                |
|                                                      | N/A                                                  | 59.26                                                |
| <i>R.m.s. deviations</i>                             |                                                      |                                                      |
| Bond lengths (Å)                                     | 0.004                                                | 0.003                                                |
| Bond angles (°)                                      | 0.889                                                | 0.653                                                |
| <i>Ramachandran</i>                                  |                                                      |                                                      |
| Favored (%)                                          | 98.80                                                | 98.92                                                |
| Allowed (%)                                          | 1.20                                                 | 1.08                                                 |
| Outliers (%)                                         | 0.00                                                 | 0.00                                                 |
| Rotamer outliers (%)                                 | 0.29                                                 | 0.57                                                 |
| Wilson B                                             | 77.57                                                | 51.79                                                |
| PDB ID                                               | 7JGZ                                                 | 7RGF                                                 |

**Figure 3—source data 1. X-ray crystallography data collection and refinement statistics**

Values in parentheses are for the outer shell. APS, Advanced Photon Source, Argonne National Lab; A.S.U., asymmetric unit; R.m.s., Root mean square. See Figure 4—figure supplement 1 and Methods for further details on the ellipsoidal resolution limits.



| RMSDs over <i>trans</i> dimers and individual interacting domains | $\gamma$ C4 crystal form 1 (intact interface) |                     |                     |
|-------------------------------------------------------------------|-----------------------------------------------|---------------------|---------------------|
|                                                                   | EC1-4:EC1-4 (834 atoms)                       | EC1:EC4 (196 atoms) | EC2:EC3 (209 atoms) |
| $\gamma$ C4 crystal form 2 chain A:chain B                        | 2.9 Å (734 atoms)                             | 1.3 Å (196 atoms)   | 0.9 Å (198 atoms)   |
| $\gamma$ C4 crystal form 2 chain B:chain A                        | 2.9 Å (734 atoms)                             | 1.9 Å (194 atoms)   | 1.3 Å (207 atoms)   |
| <u>Alternate clustered Pcdhs:</u>                                 |                                               |                     |                     |
| $\alpha$ 7 dimer                                                  | 3.3 Å (801 atoms)                             | 2.0 Å (189 atoms)   | 1.7 Å (196 atoms)   |
| $\beta$ 6 dimer                                                   | 4.5 Å (769 atoms)                             | 2.5 Å (180 atoms)   | 3.8 Å (200 atoms)   |
| $\gamma$ A1 dimer                                                 | 3.5 Å (794 atoms)                             | 3.2 Å (191 atoms)   | 2.2 Å (182 atoms)   |
| $\gamma$ B2 dimer                                                 | 4.3 Å (802 atoms)                             | 1.5 Å (187 atoms)   | 1.8 Å (196 atoms)   |
| <u>Non-clustered <math>\delta</math>1 Pcdhs:</u>                  |                                               |                     |                     |
| Human ncPcdh1 dimer                                               | 7.0 Å (784 atoms)                             | 1.5 Å (139 atoms)   | 2.9 Å (185 atoms)   |
| <u>Non-clustered <math>\delta</math>2 Pcdhs:</u>                  |                                               |                     |                     |
| Xenopus ncPcdh8.1 dimer                                           | 3.4 Å (756 atoms)                             | 3.0 Å (174 atoms)   | 2.4 Å (206 atoms)   |
| Human ncPcdh10 dimer                                              | 2.4 Å (785 atoms)                             | 2.1 Å (189 atoms)   | 1.3 Å (195 atoms)   |
| Human ncPcdh18 dimer                                              | 3.1 Å (786 atoms)                             | 1.7 Å (157 atoms)   | 2.4 Å (207 atoms)   |
| Human ncPcdh19 dimer                                              | 3.3 Å (780 atoms)                             | 2.0 Å (155 atoms)   | 1.2 Å (187 atoms)   |
| Zebrafish ncPcdh19 dimer                                          | 2.4 Å (778 atoms)                             | 1.9 Å (165 atoms)   | 1.2 Å (198 atoms)   |

**Figure 3—source data 2. Overall structural similarity between  $\gamma$ C4, alternate cPcdhs, and non-clustered Pcdhs *trans* dimer structures**

Table lists the pairwise root mean square deviations over aligned  $C\alpha$ 's (RMSDs) between the intact  $\gamma$ C4<sub>EC1-4</sub> *trans* dimer (crystal form 1) and a representative selection of available cPcdh and ncPcdh *trans* dimer structures. RMSDs between the complete EC1-4:EC1-4 *trans* dimers are given in column 2. RMSDs between individual interacting EC1:EC4 and EC2:EC3 regions of Pcdh *trans*-dimer structures are given in columns 3 and 4. The number of aligned  $C\alpha$ 's for each pairwise alignment is given in parentheses. The PDB codes for the aligned crystal structures are as follows:  $\alpha$ 7<sub>EC1-5</sub>, 5DZV;  $\beta$ 6<sub>EC1-4</sub>, 5DZX;  $\beta$ 8<sub>EC1-4</sub>, 5SZL;  $\gamma$ B2<sub>EC1-5</sub>, 5T9T;  $\alpha$ C2<sub>EC1-3</sub>, 4ZPM;  $\gamma$ C3<sub>EC1-3</sub>, 4ZI8;  $\gamma$ C5<sub>EC1-3</sub>, 4ZPO; ncPcdh1<sub>EC1-4</sub>, 6MGA; ncPcdh8.1<sub>EC1-6</sub>, 6VG1; ncPcdh10<sub>EC1-4</sub>, 6VFW; ncPcdh18<sub>EC1-4</sub>, 6VFR; ncPcdh19<sub>EC1-4</sub>, 6VFU; and zebrafish ncPcdh19<sub>EC1-4</sub>, 5IU9 (Goodman et al., 2016a; Goodman et al., 2016b; Rubinstein et al., 2015; Nicoludis et al., 2015; Modak and Sotomayor, 2019; Harrison et al., 2020; Cooper et al., 2016)

| <b>Protein</b>                            | <b>Oligomeric State</b> | <b>Dissociation Constant, <math>K_D</math> (<math>\mu\text{M}</math>)</b> |
|-------------------------------------------|-------------------------|---------------------------------------------------------------------------|
| <b><i>Cis-interacting fragments</i></b>   |                         |                                                                           |
| $\beta 1_{3-6}$                           | Monomer                 | N/A                                                                       |
| $\beta 6_{1-6}$                           | Tetramer                | 1.7 / 12.1 <sup>†</sup>                                                   |
| $\beta 9_{3-6}$                           | Dimer                   | 35 $\pm$ 3.1                                                              |
| $\gamma A3_{3-6}$                         | Dimer                   | 110 $\pm$ 7.3                                                             |
| $\gamma A4^*_{3-6}$                       | Monomer                 | N/A                                                                       |
| $\gamma A9_{3-6}$                         | Monomer                 | N/A                                                                       |
| $\gamma B2^*_{3-6}$                       | Dimer                   | 80.1 $\pm$ 12.8                                                           |
| $\gamma B5^*_{3-6}$                       | Dimer                   | 32.6 $\pm$ 4.6                                                            |
| $\gamma B7^*_{3-6}$                       | Dimer                   | 59.0 $\pm$ 3.4                                                            |
| $\alpha C2_{3-6}$ -AVI                    | Dimer                   | 7.2 $\pm$ 1.2                                                             |
| $\alpha C2^*_{2-6}$                       | Dimer                   | 8.92 $\pm$ 0.28                                                           |
| $\alpha 7_{1-5}$ / $\gamma C3_6$ chimera* | Tetramer                | 3.0 / 3.9 <sup>†</sup>                                                    |
| $\gamma C3^*_{3-6}$                       | Monomer                 | N/A                                                                       |
| $\gamma C5_{2-6}$                         | Dimer                   | 18.4 $\pm$ 0.24                                                           |
| <b><i>Cis mutants</i></b>                 |                         |                                                                           |
| $\gamma B7_{3-6}$ Y532G*                  | Monomer                 | N/A                                                                       |
| $\gamma B7_{3-6}$ A570R                   | Monomer                 | N/A                                                                       |

**Figure 4—source data 1. Sedimentation equilibrium analytical ultracentrifugation data for *cis* SPR reagents**

\* Previously published data (Rubinstein et al., 2015; Goodman et al., 2016b; Goodman et al., 2017)

<sup>†</sup>  $K_{DS}$  of monomer-to-dimer / dimer-to-tetramer transitions from fitting the data to a tetramer model.

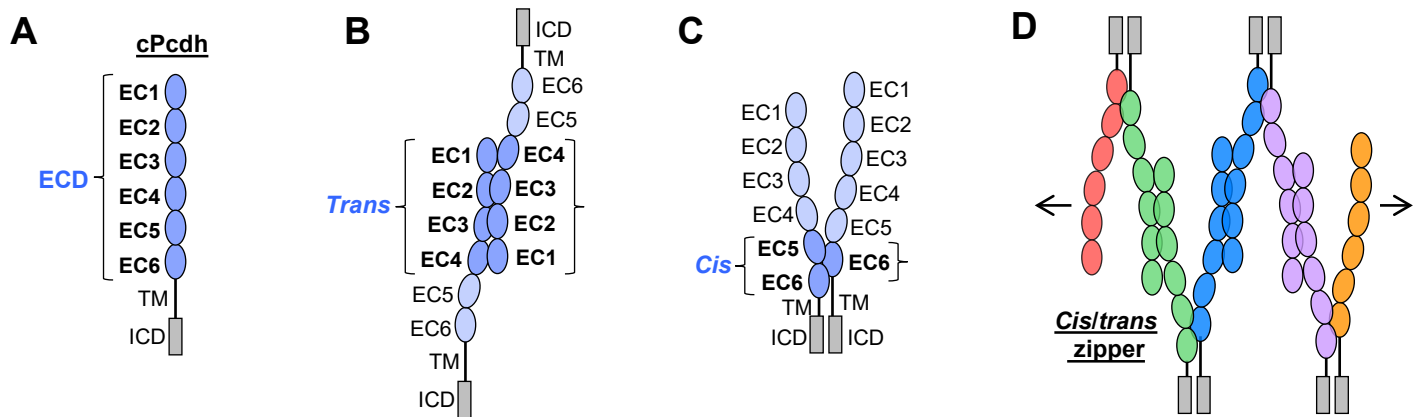

**Figure 1: cPcdh domain organization and extracellular interactions**

(A) Schematic depicting the domain organization of cPcdhs. EC, extracellular cadherin domain; TM, transmembrane domain; ECD, ectodomain; ICD, intracellular domain.

(B) Schematic of two cPcdhs interacting via the EC1–4 *trans* interface.

(C) Schematic of two cPcdhs interacting via the EC5–6/EC6 *cis* interface.

(D) Schematic depiction of the *cis/trans* cPcdh zipper comprising multiple cPcdh isoforms (various colors) engaged in homophilic *trans* interactions and promiscuous *cis* interactions as required for the proposed “isoform-mismatch chain-termination model” of cPcdh-mediated neuronal self-recognition and self-avoidance.

Figure 2

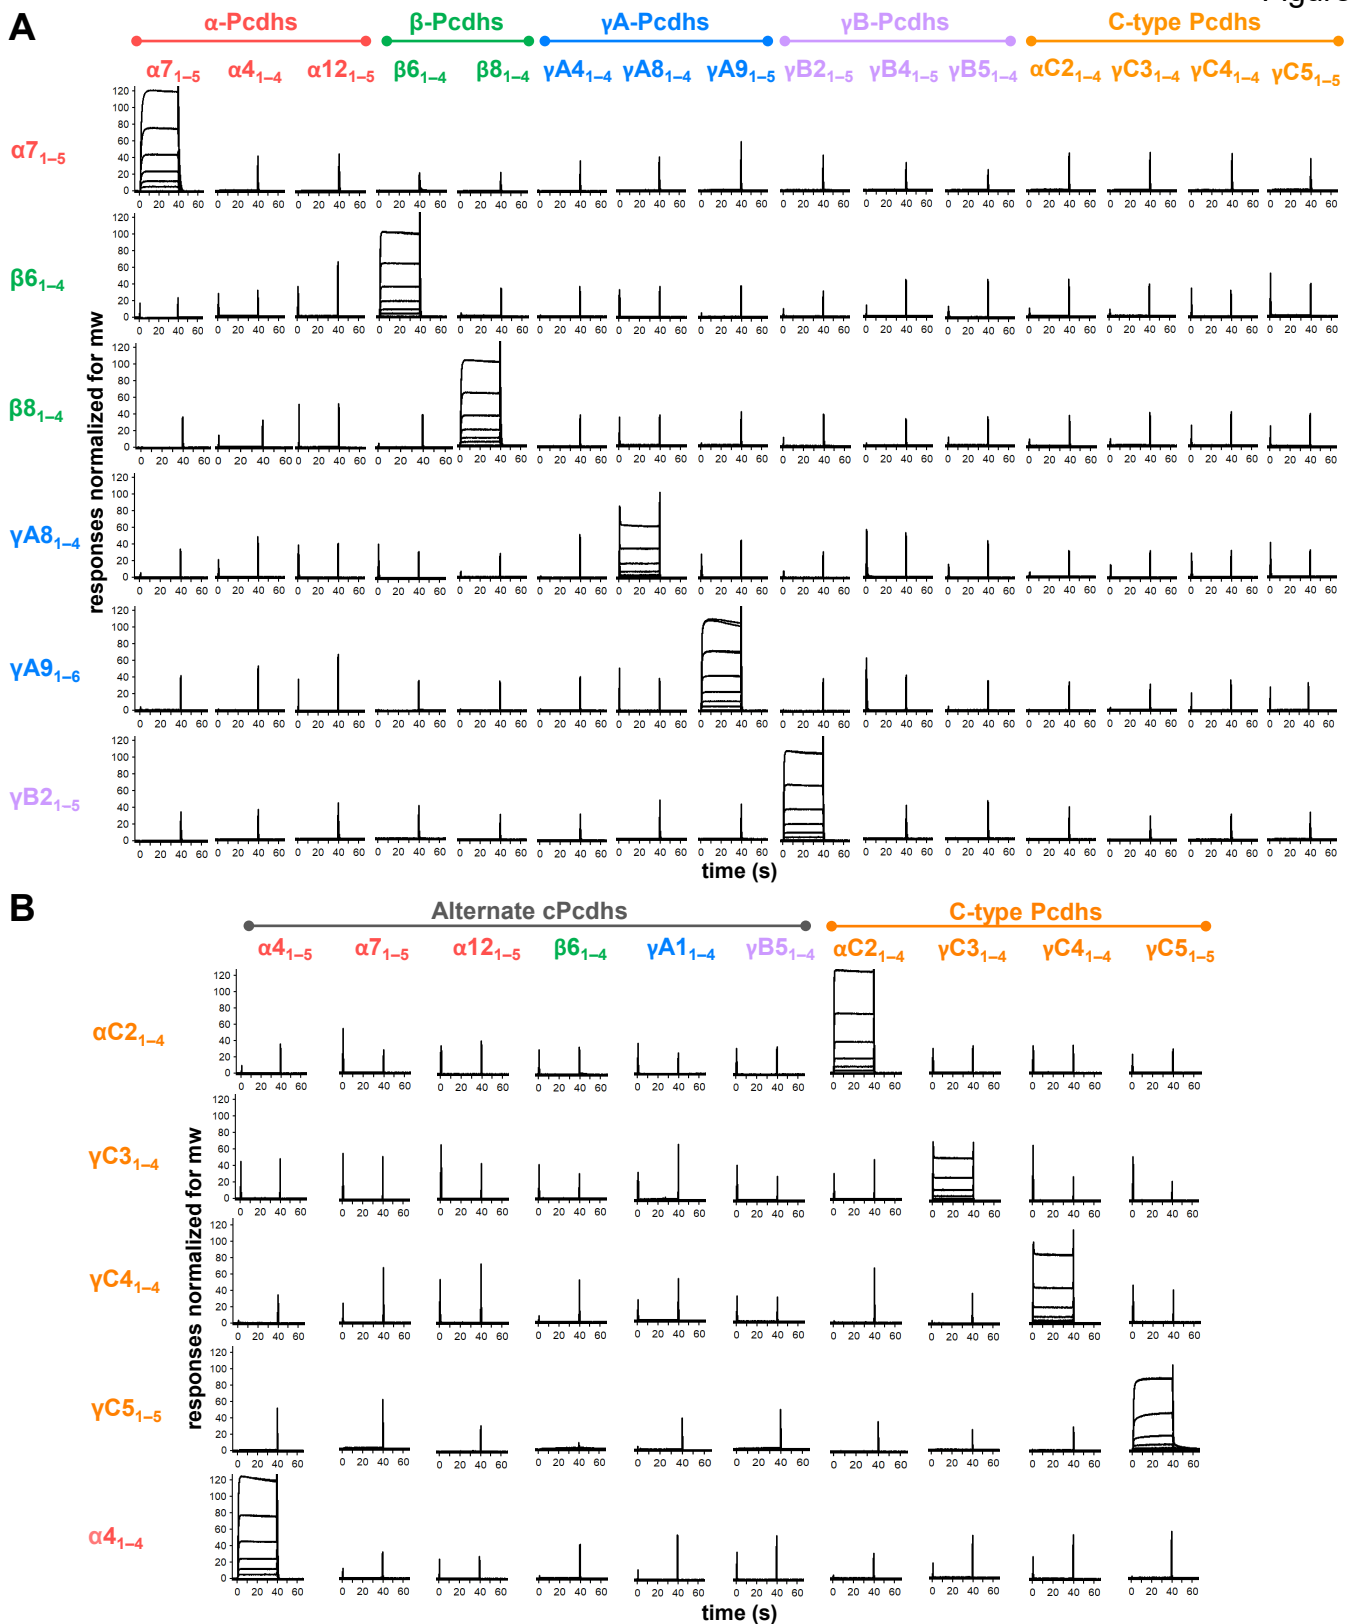

**Figure 2: cPcdhs show strict homophilic specificity in their *trans* interactions**

**(A)** SPR binding profiles of cPcdh *trans* fragment analytes from all cPcdh subfamilies (denoted in the top row) flowed over six surfaces coated with alternate cPcdh *trans* fragments (rows). Responses over all surfaces are drawn on the same scale and normalized for molecular weight.

**(B)** SPR binding profiles of cPcdh *trans* fragment analytes from all cPcdh subfamilies (shown in columns) flowed over individual surfaces coated with C-type and  $\alpha 4$  cPcdh *trans* fragments (rows). Responses over all surfaces are drawn on the same scale and normalized for molecular weight.

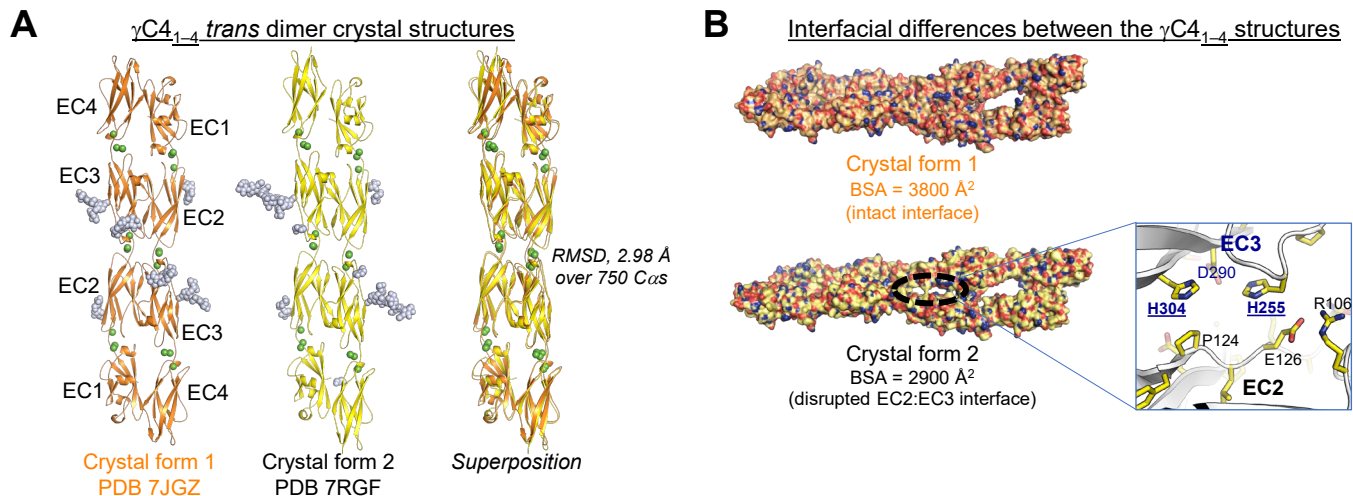

**C** Comparison between specific regions of the  $\gamma$ C4 and  $\gamma$ B2 *trans* dimer interfaces

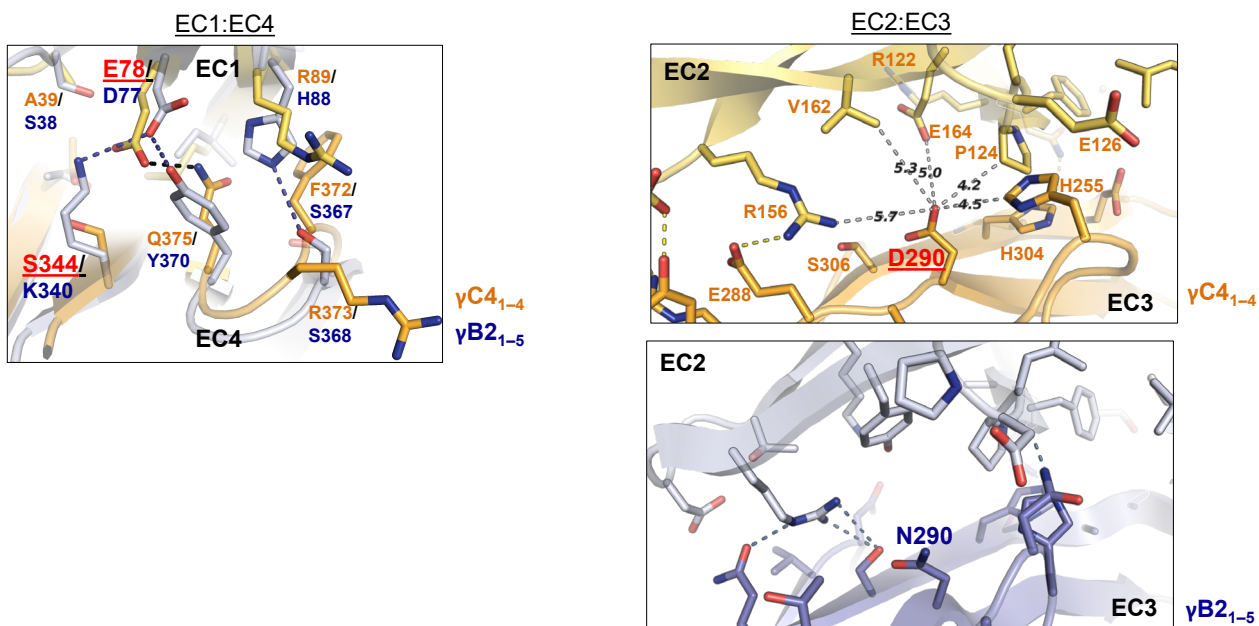

**D**

| Protein                          | Oligomeric State          | Dissociation Constant, K <sub>D</sub> (μM) |
|----------------------------------|---------------------------|--------------------------------------------|
| $\gamma$ C4 <sub>1-4</sub> wt    | Monomer / Very weak dimer | > 500                                      |
| $\gamma$ C4 <sub>1-4</sub> E78A  | Dimer                     | 58 ± 0.60                                  |
| $\gamma$ C4 <sub>1-4</sub> E78Q  | Dimer                     | 83 ± 2.6                                   |
| $\gamma$ C4 <sub>1-4</sub> S344R | Dimer                     | 112 ± 14                                   |
| $\gamma$ C4 <sub>1-4</sub> D290A | Monomer                   | N/A                                        |
| $\gamma$ C4 <sub>1-4</sub> D290N | Monomer                   | N/A                                        |

**Figure 3: C-type cPcdh  $\gamma$ C4 adopts an EC1–4-mediated head-to-tail *trans* dimer like alternate cPcdhs with a comparatively weak dimer affinity**

(A) Ribbon diagrams of the  $\gamma$ C4<sub>EC1–4</sub> *trans* dimer crystal structures obtained from two different crystal forms. Bound calcium ions are shown as green spheres and glycans are shown in pale blue spheres.

(B) The two crystal structures have a markedly different *trans* interface buried surface area (BSA). *Left*, Surface views of the two *trans* dimer crystal structures highlight the difference, with a gap apparent in the EC2:EC3 region of the interface in crystal form 2 that is absent from crystal form 1. Surfaces are colored by atom type with the carbons colored orange for crystal form 1 and yellow for crystal form 2. *Right*, Close up view of the gap region in the crystal form 2 dimer with the side chains depicted as sticks. The intact crystal form 1  $\gamma$ C4 dimer is similar overall to those of the published intact alternate  $\alpha$ ,  $\beta$ ,  $\gamma$ A, and  $\gamma$ B cPcdhs and the published  $\delta$ 2 non-clustered (nc) Pcdh *trans* dimers (root mean square deviation over aligned C $\alpha$ s (RMSD) 2.4–4.5 Å; Figure 3—source data 2). The published crystal structures of  $\gamma$ A8,  $\gamma$ A1, and  $\gamma$ B3 also show partially disrupted *trans* interfaces though in differing regions of the interface (Goodman et al., 2016b, Nicoludis et al., 2016).

(C) Comparison between the (i) EC1:EC4 and (ii) EC2:EC3 regions of the  $\gamma$ C4 (orange) and  $\gamma$ B2 (blue, PDB 5T9T) *trans* dimer interfaces. (i) Structural alignment of the EC1:EC4 portion of the  $\gamma$ C4 and  $\gamma$ B2 *trans* dimers highlights a possible destabilizing role for  $\gamma$ C4 residue E78 since unlike its counterpart in  $\gamma$ B2 (D77) it is not juxtaposed with a basic residue. (ii) Similarly, an additional negatively charged residue (D290) which occupies a central position in the  $\gamma$ C4 EC2:EC3 interface may also contribute to  $\gamma$ C4's comparatively weak *trans* dimer interaction. Distances between the D290 side chain and its nearest contacts are shown as dashed grey lines with distances given in Angstroms.

(D) Sedimentation equilibrium AUC experiments were conducted on  $\gamma$ C4 EC1–4 wild type (wt) and interface mutants to assess whether E78 and D290 negatively impact *trans* dimerization. Table details the oligomeric state and dissociation constants for each protein tested.

Figure 4

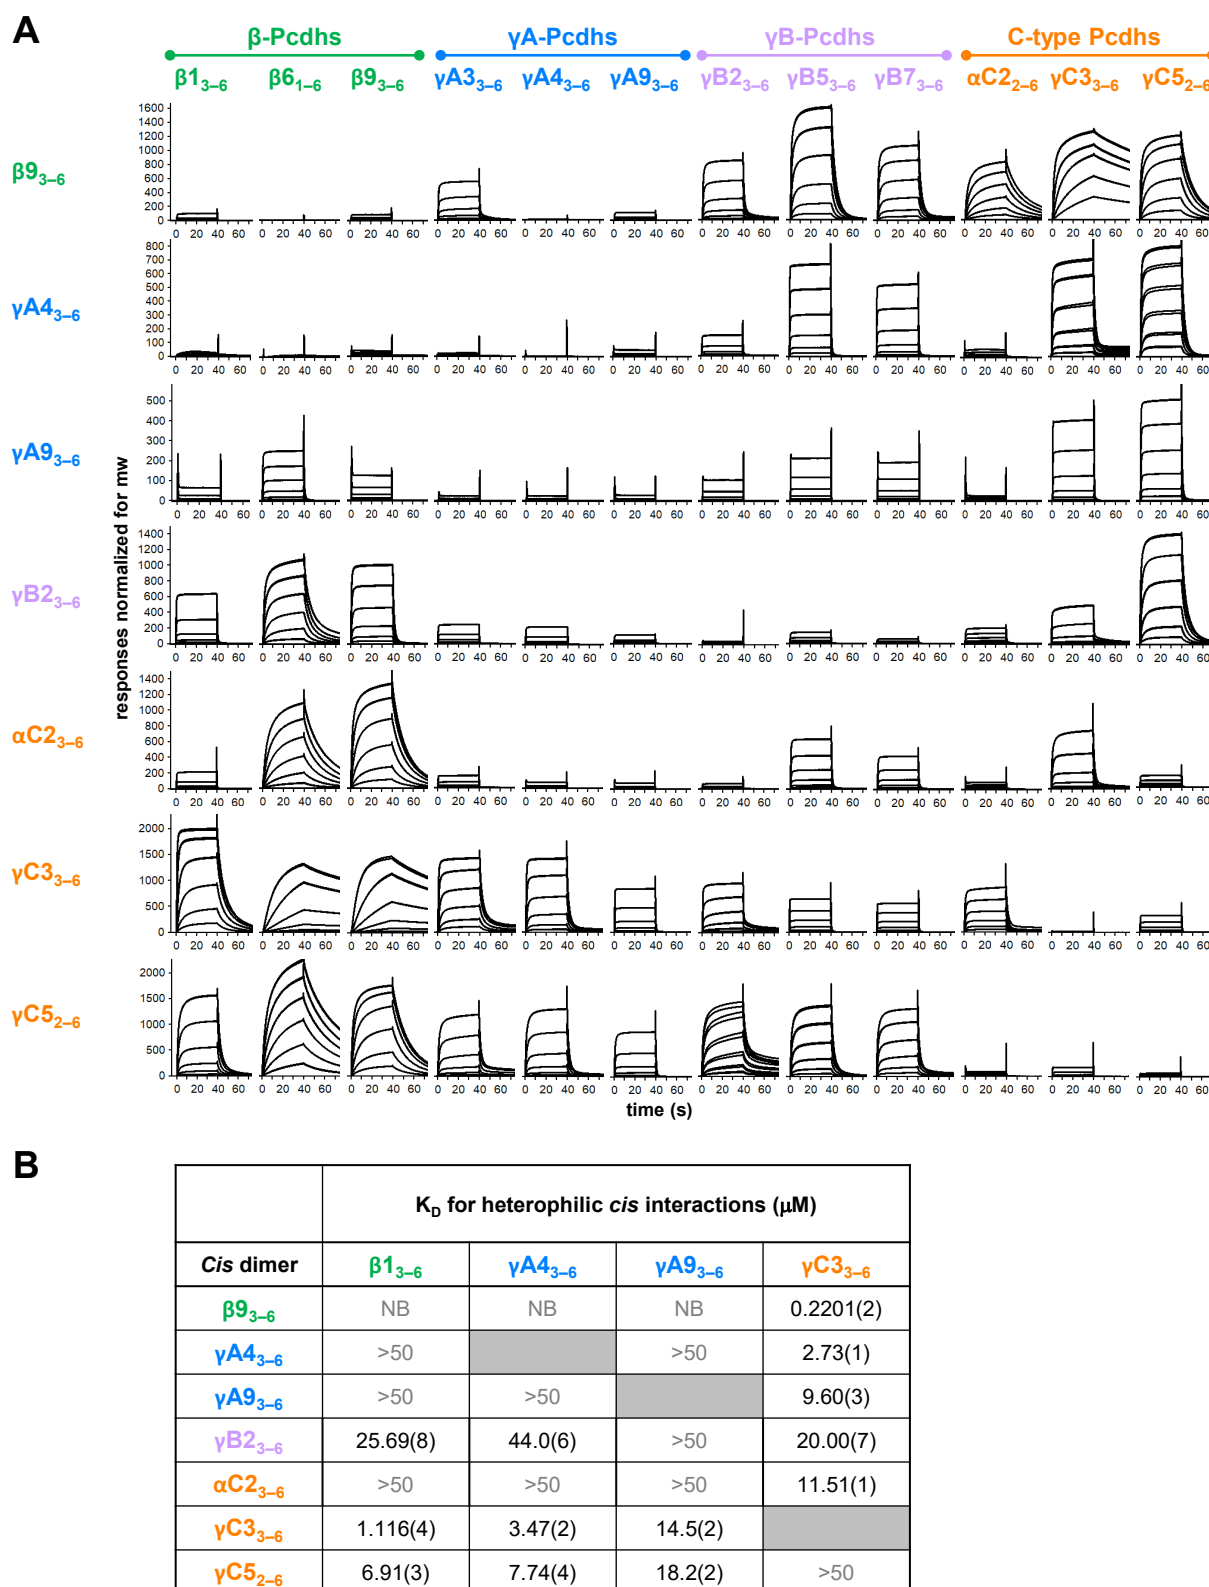

**Figure 4: cPcdh *cis* interactions are promiscuous with a preference for interfamily heterodimers**

(A) SPR binding profiles of cPcdh *cis* fragment analytes from all cPcdh subfamilies except alphas (shown in columns) flowed over individual surfaces coated with cPcdh *cis* fragments. Binding profiles for each surface are individually scaled and responses are normalized for molecular weight.

(B) Table of dissociation constants calculated from the SPR data for the four monomeric analytes. The number in brackets represents the error of the fit based on analysis of duplicate responses. Binding signals were not detected for interactions labeled NB, while >50, represents interactions with  $K_{D,S} > 50 \mu\text{M}$ , where an accurate  $K_D$  cannot be determined.

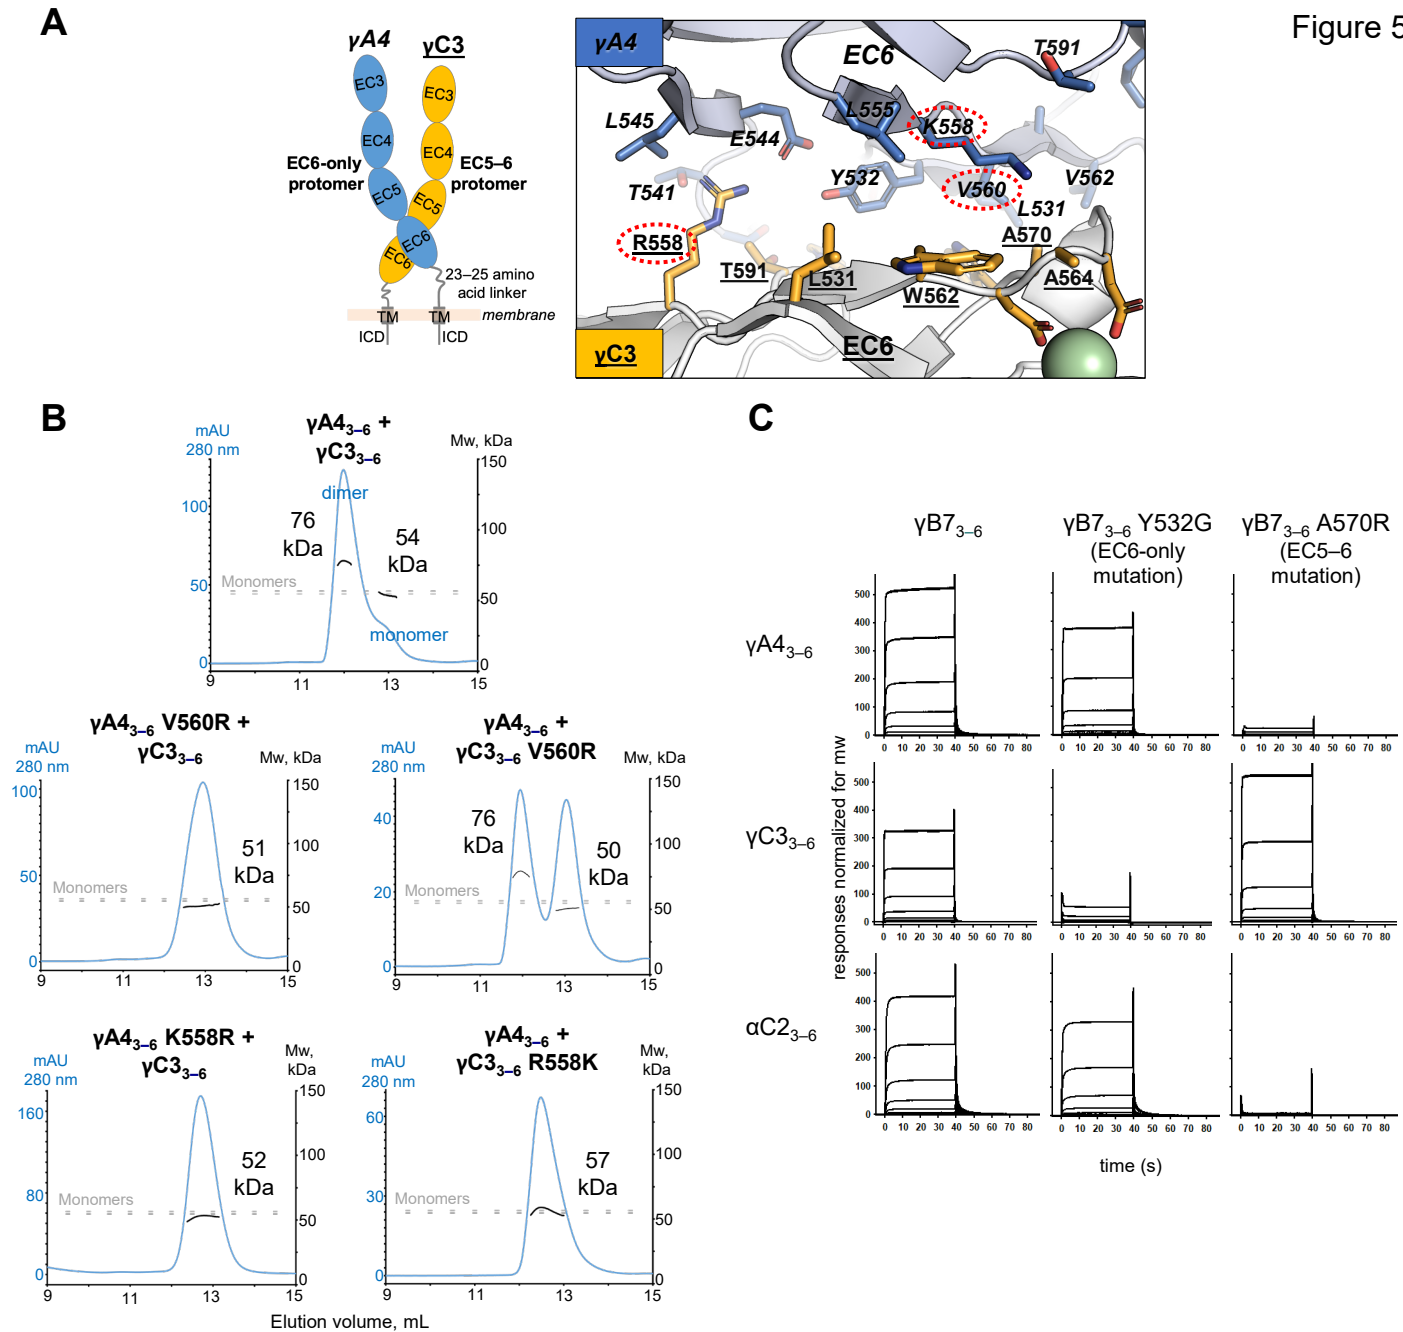

**Figure 5:  $\gamma$ A4 preferentially forms the EC6-only side and  $\gamma$ C3 the EC5–6 side in *cis* dimers**

(A) Structural model of  $\gamma$ A4/ $\gamma$ C3 *cis* dimer based on  $\gamma$ B7<sub>EC3–6</sub> *cis* dimer and  $\gamma$ A4<sub>EC3–6</sub> crystal structures (PDBs: 5V5X and 5SZQ).  $\gamma$ A4 is shown adopting the EC6-only side (blue protomer) and  $\gamma$ C3 is shown adopting the EC5–6 side (yellow protomer). Left, schematic of the  $\gamma$ A4/ $\gamma$ C3 EC3–6 *cis* dimer. Right, close-up view of the EC6:EC6 interface from the modeled *cis* dimer showing interfacial residue side chains. Bound calcium ions are shown as green spheres. Residues which were mutated in the panel B are circled in red.  $\gamma$ B7 crystal structure numbering is used for both  $\gamma$ A4 and  $\gamma$ C3 residues. See methods for  $\gamma$ A4 and  $\gamma$ C3 alignment. Please note the model shown here is solely for hypothesis generation, since it is unlikely to be completely accurate. See methods for further details of structural modeling.

(B) *Top*, SEC-MALS data for an equimolar mixture of wild-type  $\gamma$ A4<sub>EC3–6</sub> and  $\gamma$ C3<sub>EC3–6</sub> showing dimer formation. Plot shows size exclusion absorbance at 280 nm trace (left axis), molecular weight of the eluant peaks (right axis), and the monomer molecular weights of  $\gamma$ A4<sub>EC3–6</sub> and  $\gamma$ C3<sub>EC3–6</sub> measured by mass spectrometry – 54.5 kDa and 56.5 kDa respectively – as dashed grey lines. Average molecular weight of the molecules in the dimer and monomer eluant peaks are labeled. *Middle*, SEC-MALS data for V560R mutants, which target the EC6-only side of the interface. *Bottom*, SEC-MALS data for residue 558 mutants. The  $\gamma$ C3-like K558R mutation in  $\gamma$ A4 inhibits heterodimer formation with wild-type  $\gamma$ C3. Similarly, the  $\gamma$ A4-like R558K in  $\gamma$ C3 inhibits dimerization with wild-type  $\gamma$ A4.

(C) SPR binding profiles for  $\gamma$ B7<sub>EC3–6</sub> wild type and *cis* interface mutants flowed over three individual wild-type *cis* fragment surfaces. The two mutations specifically target one side of the *cis* interface.



Figure 2—figure supplement 1

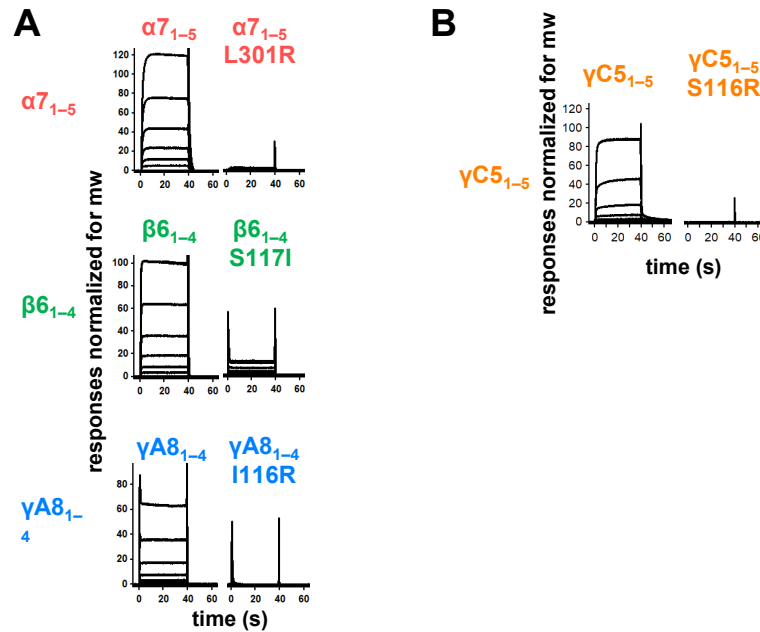

**Figure 2—figure supplement 1: *Trans* interface mutants demonstrate homophilic interactions observed in SPR are mediated by the *trans* dimer interface**

**(A)** SPR binding curves for wild-type and *trans* mutant alternate cPcdhs flowed over their respective immobilized wild-type molecule.

**(B)** SPR binding curves for wild-type and *trans* mutant C-type cPcdh  $\gamma C 5$  flowed over immobilized wild-type  $\gamma C 5$ .

Figure 2—figure supplement 2

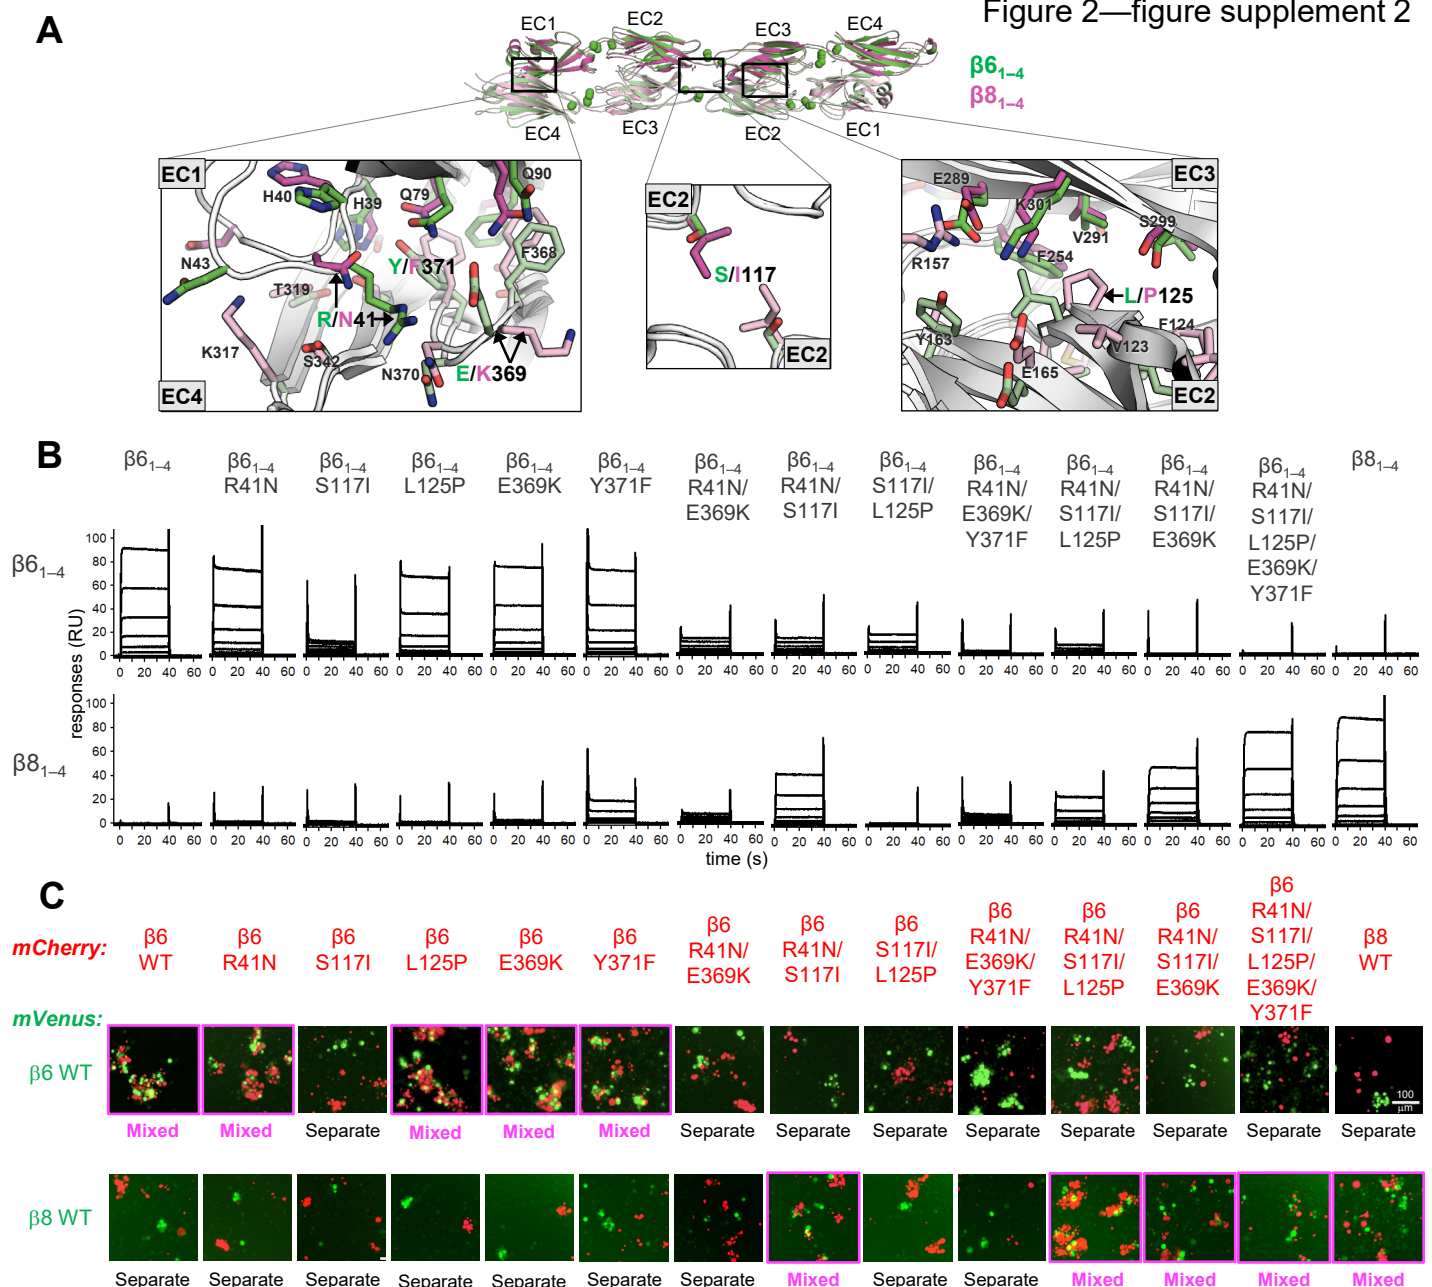

**Figure 2 —figure supplement 2: Mutagenesis experiments reveal role in *trans* specificity for the five interfacial residue differences between close pair  $\beta_{6_{1-4}}$  and  $\beta_{8_{1-4}}$**

**A.** Structural superposition of the  $\beta_{6_{1-4}}$  and  $\beta_{8_{1-4}}$  *trans* dimer crystal structures (PDBs: 5DZX and 5DZY) shown in ribbon depiction above, with close-up views of the *trans* interfacial regions containing the five interfacial residues that vary between  $\beta_{6_{1-4}}$  and  $\beta_{8_{1-4}}$  shown below. The two protomers forming the  $\beta_{6_{1-4}}$  dimer are colored green and pale green respectively. The  $\beta_{8_{1-4}}$  dimer is colored magenta/light pink. Bound calcium ions are shown as green spheres. Interfacial residue side chains are shown in the close-up views. The five variable residues are labelled with the  $\beta_{6_{1-4}}$  amino acid given in green and the  $\beta_{8_{1-4}}$  amino acid in magenta: R/N41 is in EC1; E/K369 and Y/F371 are in EC4; S/I117 is in EC2 and self-interacts at the *trans* dimer center of symmetry; and L/P125 is also in EC2.

**B.** SPR binding profiles of  $\beta_6$  *trans* interface mutants converting  $\beta_{6_{1-4}}$  to  $\beta_{8_{1-4}}$  and the wild-type molecules (shown in columns) were flowed over surfaces coated with wild-type  $\beta_{6_{1-4}}$  or wild-type  $\beta_{8_{1-4}}$  (rows).

**C.** Results of the K562 co-aggregation assay where cells transfected with mCherry labeled  $\beta_6$  and  $\beta_8$  wild-types (WT) and the same *trans*-specificity mutants as in (B) were each mixed with cells transfected with mVenus labeled  $\beta_6$  and  $\beta_8$  wild-types (WT). Experiments where the red and green cells co-aggregate demonstrating interaction between the mCherry-labeled WT or mutant cPcdh and the mVenus-labeled WT cPcdh are labeled “mixed” and highlighted with magenta boxes. Scale bar, 100  $\mu$ M.

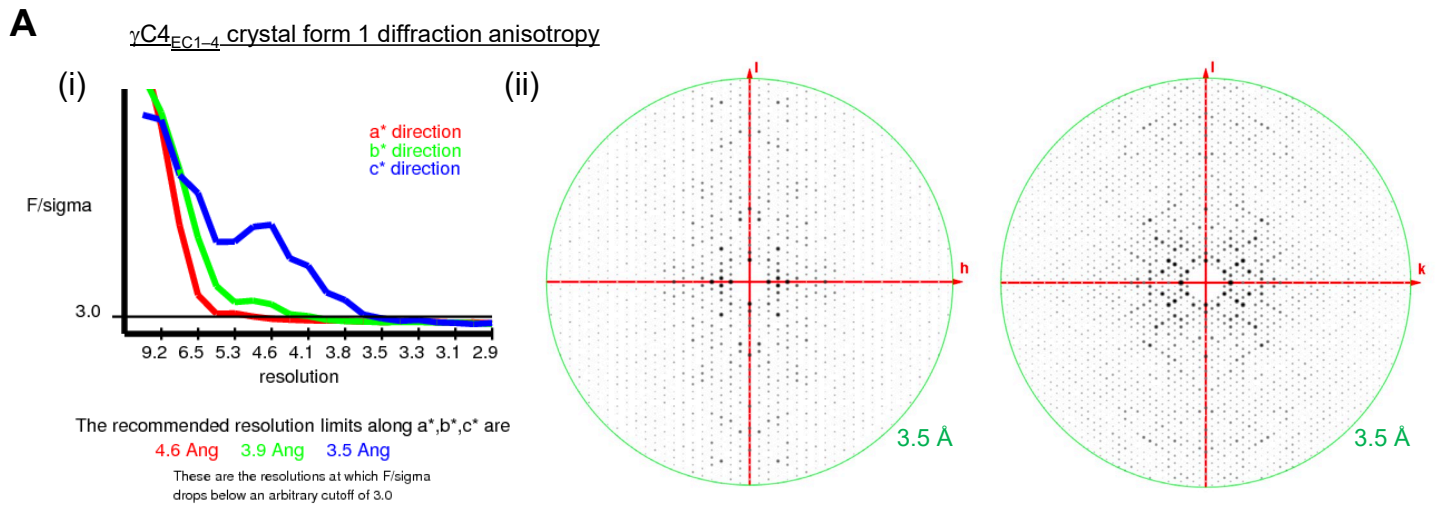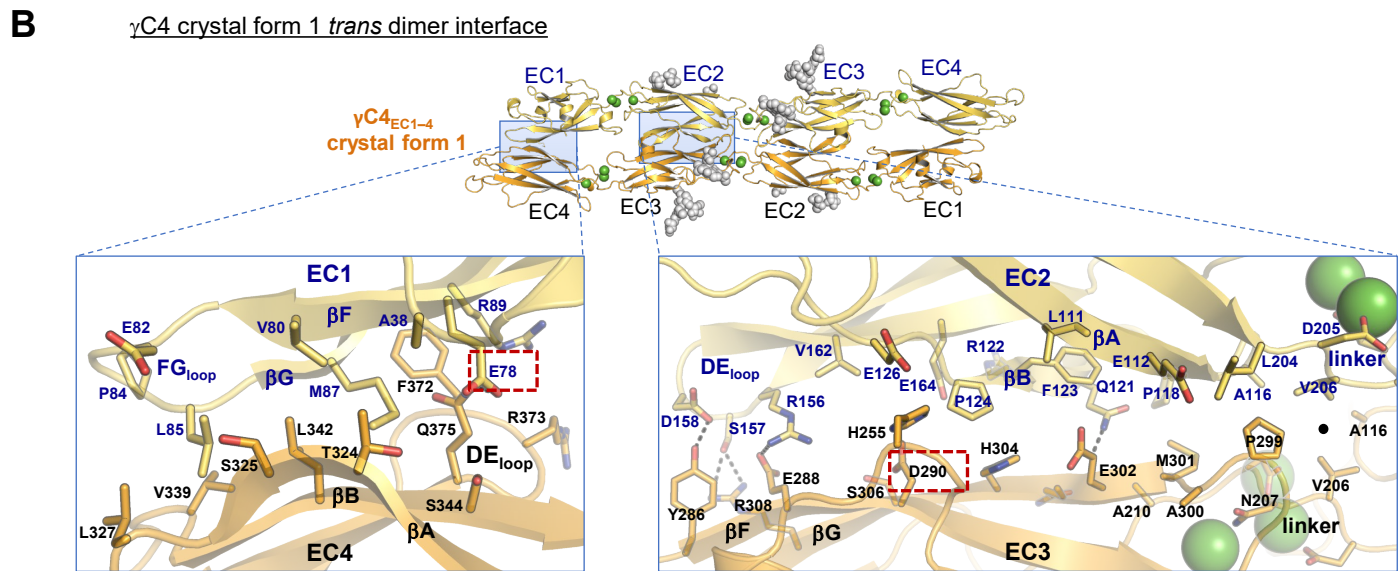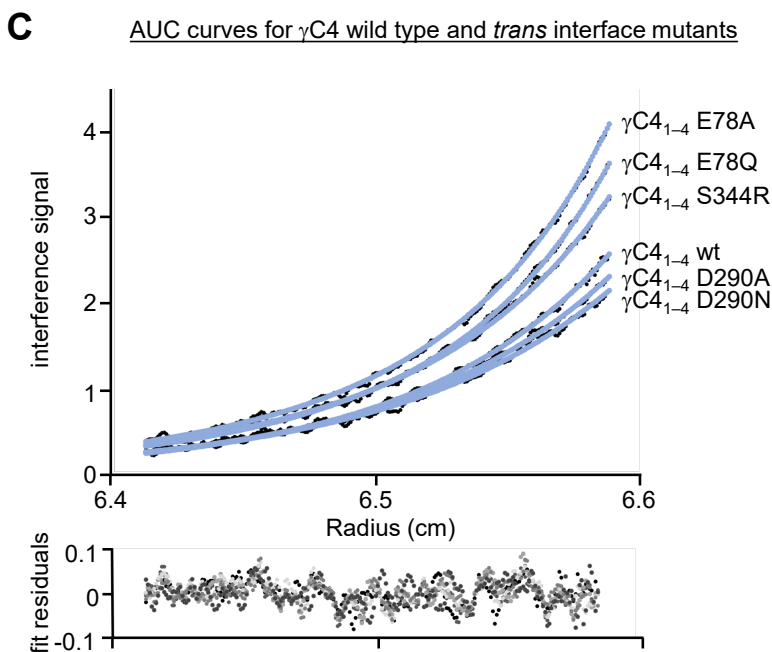

**Figure 3—figure supplement 1:  $\gamma C4$  *trans* dimer crystal structures and *trans* interface analysis**

(A) Our crystallization experiments with  $\gamma C4_{EC1-4}$  yielded two distinct crystal forms the first of which showed significant X-ray diffraction anisotropy. (i) UCLA Diffraction Anisotropy Server (Strong et al., 2006) plot shows the F/sigma by resolution along the a\*, b\* and c\* axes. (ii) Synthetic precession photographs of the X-ray diffraction in the k=0 plane (left) and the h=0 plane (right) showing the comparatively stronger/weaker diffraction.

(B) Close up views of the EC1:EC4 and EC2:EC3 interfacial regions from the first crystal form. One protomer in the symmetric dimer is colored yellow the other orange. Interfacial residues are labeled, side chains are shown in stick representation and dashed black lines depict potential interfacial hydrogen bond interactions. The two charged residues, E78 and D290, we selected for mutagenesis experiments to see whether they play a destabilizing role in the  $\gamma C4$  *trans* interaction are marked with red dashed boxes.

(C) Representative plot of AUC data for the wild type (wt) and mutant  $\gamma C4$  EC1–4 molecules. Raw data are shown in black circles, and the non-linear fits to a monomer-to-dimer model are shown as blue lines. The residuals between the data and fits are shown in the plot below. Table detailing the oligomeric state and dissociation constants determined from the AUC data is shown in Figure 3.

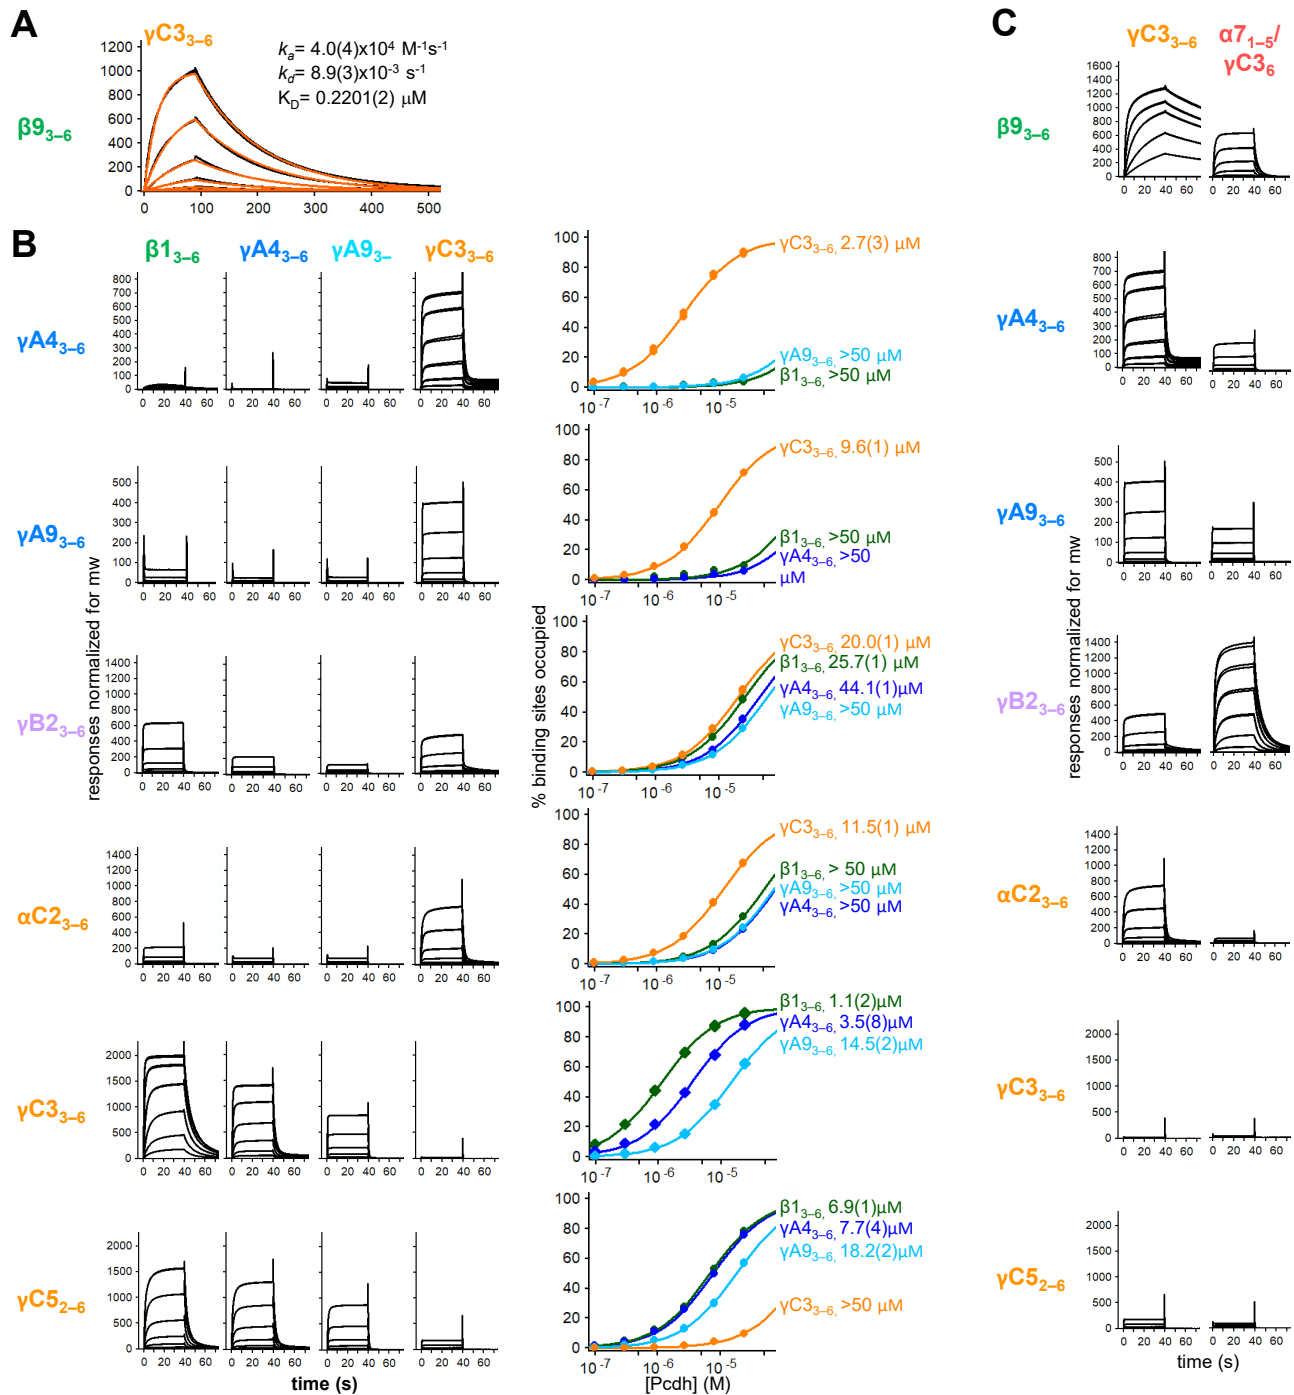

**Figure 4—figure supplement 1: Calculation of *cis* interaction dissociation constants and the impact of an  $\alpha$ -Pcdh EC5 on family-wide *cis* interactions**

(A) Kinetic binding analysis of  $\gamma C_{3-6}$  analyte binding over a  $\beta 9_{3-6}$  covered surface. Data is shown in black, and the red traces represent the fit to an 1:1 binding model.

(B) *Left*, SPR binding profiles from Figure 4 for the four monomeric *cis* fragment analytes over all six *cis* fragment surfaces. *Right*, fit of the binding data for these four analytes to 1:1 binding isotherms to calculate  $K_D$ s.  $\gamma A_{4-6}$  and  $\gamma A_{9-6}$  are monomeric and they are not included in the binding isotherms over their respective surface.

(C) SPR binding profiles for  $\gamma C_{3-6}$  (from Figure 4) and an  $\alpha 7_{1-5} / \gamma C_6$  chimera flowed over the immobilized *cis* fragment surfaces. Binding profiles for each surface are individually scaled as in Figure 4.

Figure 4—figure supplement 2

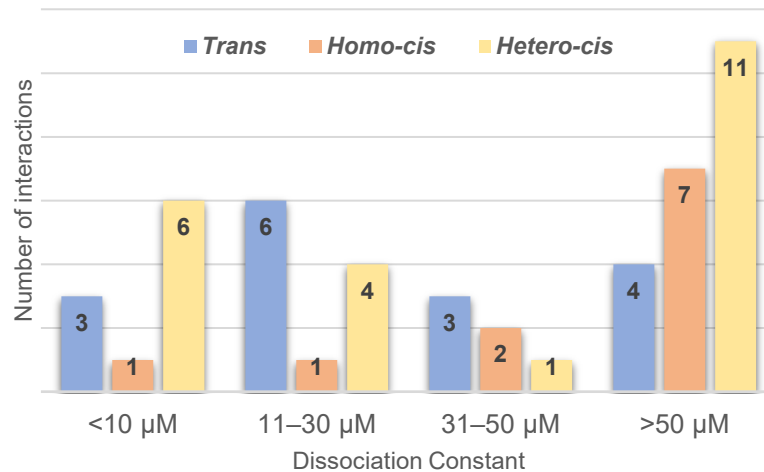

**Figure 4—figure supplement 2: Range of cPcdh *cis* and *trans* Dissociation constants, K<sub>D</sub>s**

Chart shows the cPcdh *trans* dimer, homophilic *cis* dimer, and heterophilic *cis* dimer interactions for which we have determined binding affinities divided into four subgroups based on their dissociation constant. The *trans* and homophilic *cis* dimer affinities were determined using AUC (Figure 2—source data 1 and Figure 4—source data 1) and the heterophilic *cis* dimer affinities were determined using SPR (Figure 4B). Of the interactions in the >50 μM group one *trans* interaction and four homophilic *cis* interactions are monomeric in solution (> 500 μM K<sub>D</sub> in AUC). Three of the 11 heterophilic *cis* interactions in the >50 μM group show no binding in our SPR experiments based on a 40 RU binding threshold.

Figure 4—figure supplement 3

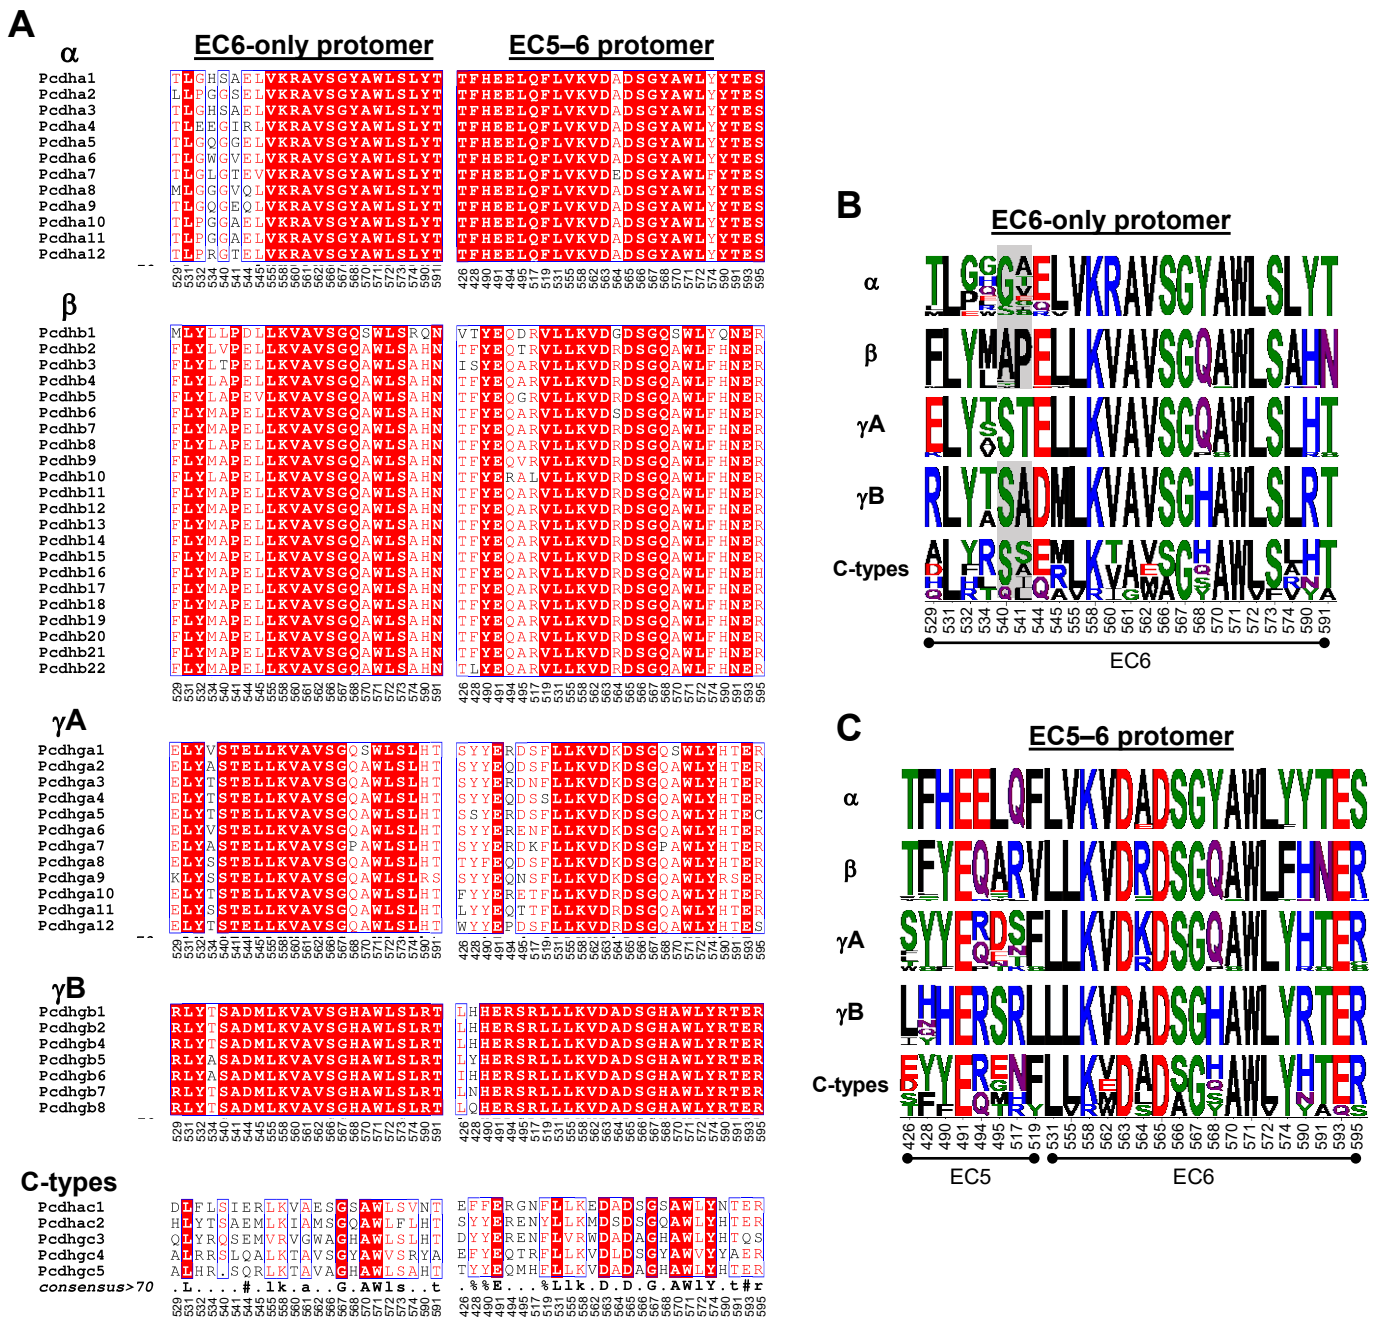

**Figure 4—figure supplement 3: Amino acid sequence alignment reveals conservation of *cis* interfacial residues within the alternate cPcdh subfamilies**

(A) Amino acid sequence alignments of *cis* interfacial residues from the EC6-only and EC5–6 surfaces for all 58 mouse cPcdhs subdivided by subfamily. Completely conserved residues are highlighted in red with white lettering. Residues 540 and 541 are included in the EC6-only alignments since the crystal structure of  $\gamma$ A4 EC3–6 (PDB: 5SZQ) revealed a distinct EC6 A-A'loop architecture to that observed in the  $\gamma$ B2, 4, and 7 (PDBs: 5SZR, 6E6B, and 5V5X) *cis* fragment crystal structures that would place these residues in the EC6-only interface if maintained in *cis* interactions.

(B) Sequence logos based on the sequence alignment shown in (A) for the EC6-only *cis* interfacial residues from each of the five cPcdh subfamilies highlighting the similarities and conserved differences between the subfamilies. Residues 540 and 541 are included for all isoforms but greyed out for the non- $\gamma$ A isoforms since their involvement may be  $\gamma$ A-specific. NB: Previous studies have shown that  $\alpha$ -Pcdhs have an impaired EC6-only interface (Thu et al., 2014; Goodman et al., 2017).

(C) Sequence logos for the EC5–6 *cis* interfacial residues from each of the five cPcdh subfamilies

### A $\gamma$ B7 *cis* dimer interface

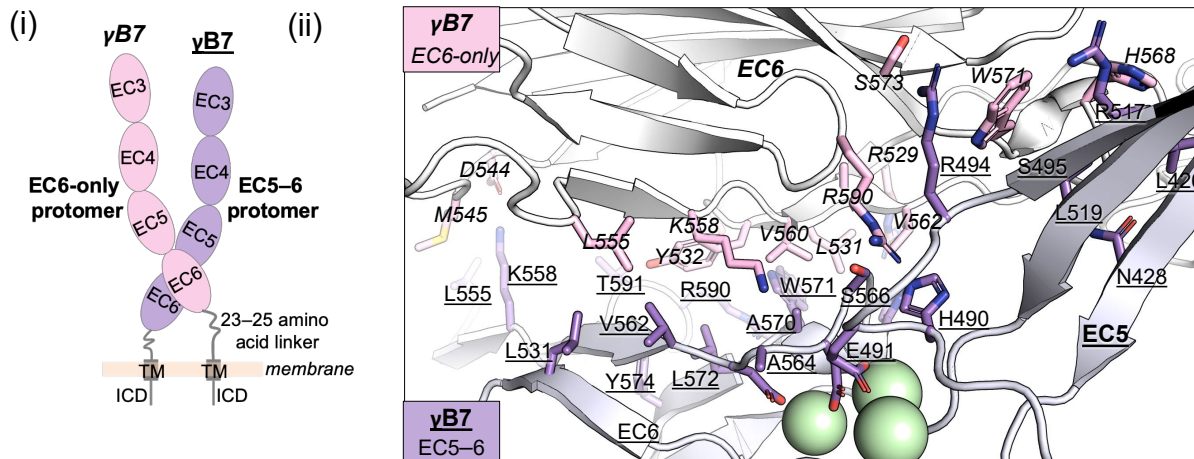

### B Modeled $\gamma$ A4<sub>EC6</sub>/ $\gamma$ C3<sub>EC5-6</sub> *cis* dimer interface

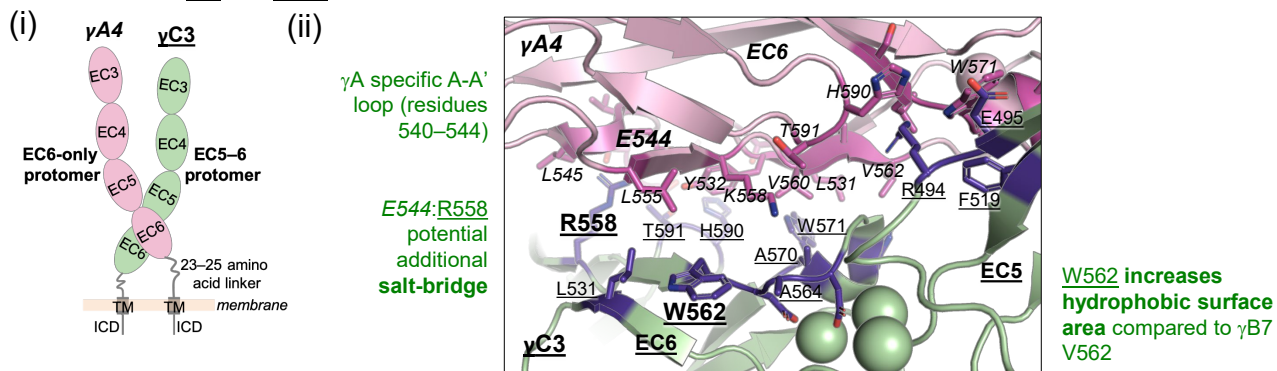

### C Modeled $\gamma$ C3<sub>EC6</sub>/ $\gamma$ A4<sub>EC5-6</sub> *cis* dimer interface

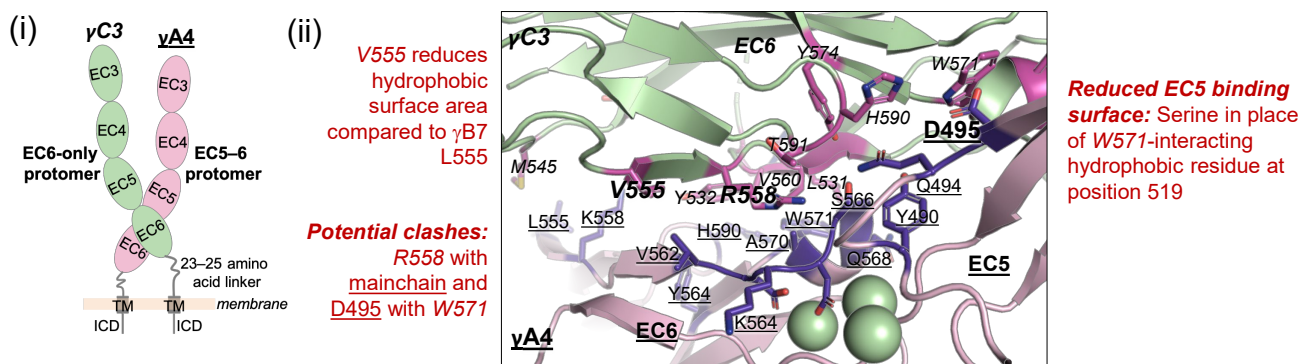

## Figure 5—figure supplement 1: Structure-guided sequence analysis of $\gamma$ A4 and $\gamma$ C3 *cis* interactions

(A) (i) Schematic of the asymmetric  $\gamma$ B7<sub>EC3-6</sub> *cis* dimer crystal structure. (ii) Close-up view of the  $\gamma$ B7 *cis* interface: Interfacial residue side chains are shown in pink for the EC6-only protomer and purple for the EC5–6 protomer. Bound calcium ions are shown as green spheres.

(B) (i) Schematic of the  $\gamma$ A4<sub>EC6</sub>/ $\gamma$ C3<sub>EC5-6</sub> *cis* dimer. (ii) Model of the  $\gamma$ A4<sub>EC6</sub>/ $\gamma$ C3<sub>EC5-6</sub> *cis* dimer interaction generated using structural alignment of EC6 from the monomeric  $\gamma$ A4 EC3–6 crystal structure (PDB 5SZQ) to the  $\gamma$ B7 EC3–6 *cis* dimer structure for the EC6-only side and computational mutagenesis of  $\gamma$ B7 to  $\gamma$ C3 selecting the best-fit rotamer (without energy minimization) for the EC5–6 side. The model suggests that this will be the preferred orientation for the  $\gamma$ A4/ $\gamma$ C3 *cis* dimer interaction. Favorable residue differences between  $\gamma$ B7 from (A) and  $\gamma$ A4/ $\gamma$ C3 in this orientation are noted in green. Please note the model shown here is only used for hypothesis generation, since it is unlikely to be completely accurate.

(C) (i) Schematic of the  $\gamma$ C3<sub>EC6</sub>/ $\gamma$ A4<sub>EC5-6</sub> *cis* dimer. (ii) Model of the  $\gamma$ C3<sub>EC6</sub>/ $\gamma$ A4<sub>EC5-6</sub> *cis* dimer generated using computational mutagenesis of  $\gamma$ B7 to  $\gamma$ C3 selecting the best-fit rotamer (without energy minimization) for the EC6-only side and structural alignment of EC5–6 from the  $\gamma$ A4 EC3–6 crystal structure to the  $\gamma$ B7 EC3–6 *cis* dimer structure for the EC5–6 side. The model suggests that this orientation for the  $\gamma$ A4/ $\gamma$ C3 *cis* dimer interaction will be disfavored. Unfavorable residue differences between  $\gamma$ B7 and  $\gamma$ A4/ $\gamma$ C3 in this orientation are noted in red. Please note the model shown here is unlikely to be completely accurate and is simply for hypothesis generation.

Figure 5—figure supplement 2

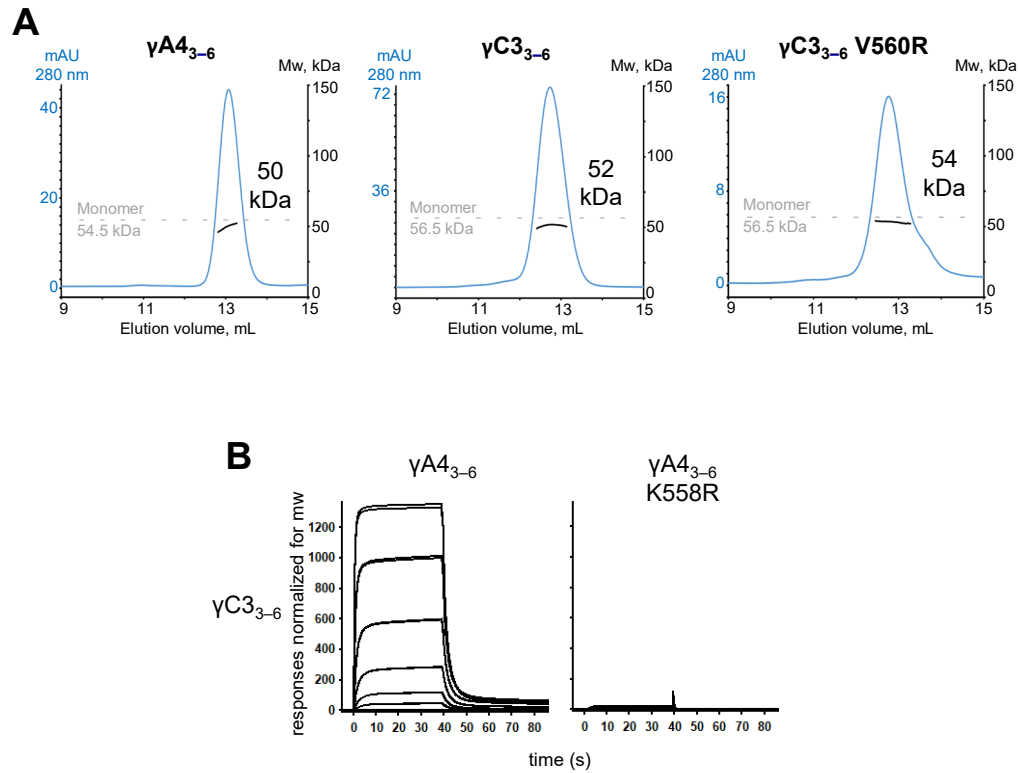

**Figure 5—figure supplement 2:  $\gamma A4$  and  $\gamma C3$  *cis*-fragments behave as monomers in SEC-MALS and mutating  $\gamma A4$  to make it more like  $\gamma C3$  prevents  $\gamma A4/\gamma C3$  *cis*-heterodimerization**

(A) SEC-MALS data for wild-type  $\gamma A4_{3-6}$ , wild-type  $\gamma C3_{3-6}$ , and  $\gamma C3_{3-6}$  V560R showing all three molecules are monomeric in SEC-MALS, consistent with their behavior in sedimentation equilibrium AUC. Plots show size exclusion absorbance at 280 nm trace in blue (left axis), molecular weight of the eluant peak in black (right axis), and the monomer molecular weight of  $\gamma A4_{3-6}$  or  $\gamma C3_{3-6}$  measured by mass spectrometry – 54.5 kDa and 56.5 kDa respectively – as dashed grey lines. Average molecular weight of the molecules in the eluant peaks are labeled.

(B) SPR binding profiles for  $\gamma A4_{3-6}$  wild type and  $\gamma A4_{3-6}$  with  $\gamma C3$ -like *cis* interface mutation K558R flowed over immobilized wild-type  $\gamma C3_{3-6}$ . Loss of  $\gamma C3_{3-6}$  interaction in the presence of the K558R mutation is consistent with the SEC-MALS results shown in Figure 5.
